# Supplementary material for: Marine biodiversity from zero to a thousand meters at Clipperton Atoll (Île de La Passion), Tropical Eastern Pacific
Source: PeerJ. 2019 Jul 16;7:e7279. doi: 10.7717/peerj.7279 (PMC6640628; doi:10.7717/peerj.7279)
Supplement: Supplemental Information 1 [file peerj-07-7279-s006.xlsx]

## Sheet: Data
Method	Method_Dive	Dive	Date	Lat	Long	Depth_range	Depth_m	Phylum	Class	Order	Family	Genus species	abundance_num_m^2	Common name	Percent cover
Drop cam	Drop cam_10	10	2016-03-17	10.3549	-109.213	501_1000m	776	Chordata	Actinopterygii	Gadiformes	Macrouridae	Bathygadus sp	9	Grenadiers	NA
Drop cam	Drop cam_10	10	2016-03-17	10.3549	-109.213	501_1000m	776	Arthropoda	Malacostraca	Decapoda	Galatheidae	Munida hispida	40	Squat lobsters	NA
Drop cam	Drop cam_10	10	2016-03-17	10.3549	-109.213	501_1000m	776	Cnidaria	Hydrozoa	Hydrozoa	NA	NA	1		NA
Drop cam	Drop cam_11	11	2016-03-18	10.2399	-109.217	1001_1500m	1367	Chordata	Chondrichthyes	Squaliformes	Etmopteridae	Centroscyllium nigrum	2	Combtooth dogfish	NA
Drop cam	Drop cam_11	11	2016-03-18	10.2399	-109.217	1001_1500m	1367	Arthropoda	Malacostraca	Decapoda	Aristeidae	NA	6	Gamba shrimps	NA
Drop cam	Drop cam_11	11	2016-03-18	10.2399	-109.217	1001_1500m	1367	Arthropoda	Malacostraca	Decapoda	Aristeidae	NA	20	White shrimp	NA
Drop cam	Drop cam_11	11	2016-03-18	10.2399	-109.217	1001_1500m	1367	Chordata	Chondrichthyes	Chimaeriformes	Chimaeridae	Hydrolagus sp.	5	Purple chimaera	NA
Drop cam	Drop cam_11	11	2016-03-18	10.2399	-109.217	1001_1500m	1367	Cnidaria	Crinoidea	Comatulida	Charitometridae	Glyptometra lateralis	30		NA
Drop cam	Drop cam_12	12	2016-03-18	10.2643	-109.187	1001_1500m	1197	Chordata	Chondrichthyes	Chimaeriformes	Chimaeridae	Hydrolagus sp.	1	Purple chimaera	NA
Drop cam	Drop cam_12	12	2016-03-18	10.2643	-109.187	1001_1500m	1197	Echinodermata	Asteroidea	Paxillosida	Astropectinidae	NA	1	Star fish	NA
Drop cam	Drop cam_12	12	2016-03-18	10.2643	-109.187	1001_1500m	1197	Chordata	Actinopterygii	Gadiformes	Macrouridae	Bathygadus sp	1	Grenadiers	NA
Drop cam	Drop cam_12	12	2016-03-18	10.2643	-109.187	1001_1500m	1197	Chordata	Actinopterygii	Gadiformes	Moridae	Guttigadus sp	1	Grenadiers	NA
Drop cam	Drop cam_12	12	2016-03-18	10.2643	-109.187	1001_1500m	1197	Arthropoda	Malacostraca	Decapoda	Aristeidae	NA	50		NA
Drop cam	Drop cam_12	12	2016-03-18	10.2643	-109.187	1001_1500m	1197	Arthropoda	Malacostraca	Decapoda	Aristeidae	NA	30		NA
Drop cam	Drop cam_13	13	2016-03-19	10.2585	-109.278	1001_1500m	1497	Chordata	Chondrichthyes	Chimaeriformes	Chimaeridae	Hydrolagus sp.	1	Purple chimaera	NA
Drop cam	Drop cam_13	13	2016-03-19	10.2585	-109.278	1001_1500m	1497	Chordata	Actinopterygii	Gadiformes	Moridae	Antimora microlepis	1	Morid cod	NA
Drop cam	Drop cam_13	13	2016-03-19	10.2585	-109.278	1001_1500m	1497	Cnidaria	Anthozoa	Alcyonacea	Coralliidae	Corallium laauense	3	Gorgonian	NA
Drop cam	Drop cam_13	13	2016-03-19	10.2585	-109.278	1001_1500m	1497	Arthropoda	Malacostraca	Decapoda	Aristeidae	NA	10	White shrimp	NA
Drop cam	Drop cam_13	13	2016-03-19	10.2585	-109.278	1001_1500m	1497	Chordata	Actinopterygii	Gadiformes	Moridae	Antimora rostrata	1	Morid cod	NA
Drop cam	Drop cam_13	13	2016-03-19	10.2585	-109.278	1001_1500m	1497	Cnidaria	Anthozoa	Octocorallia	Acanthogorgiidae	Acanthogorgia	3	Gorgonian	NA
Drop cam	Drop cam_13	13	2016-03-19	10.2585	-109.278	1001_1500m	1497	Echinodermata	Asteroidea	Paxillosida	Astropectinidae	NA	1	Star fish	NA
Drop cam	Drop cam_14	14	2016-03-20	10.335	-109.276	0_250m	230	Chordata	Actinopterygii	Scorpaeniformes	Scorpaenidae	Pontinus spp	5	Scorpion fish	NA
Drop cam	Drop cam_14	14	2016-03-20	10.335	-109.276	0_250m	230	Chordata	Chondrichthyes	Carcharhiniformes	Sphyrnidae	Sphyrna lewini	1	scalloped hammerhead	NA
Drop cam	Drop cam_14	14	2016-03-20	10.335	-109.276	0_250m	230	Mollusca	Gastropoda	Gastropoda	NA	NA	80	Snail	NA
Drop cam	Drop cam_14	14	2016-03-20	10.335	-109.276	0_250m	230	Arthropoda	Malacostraca	Decapoda	Aristeidae	NA	30	White shrimp	NA
Drop cam	Drop cam_14	14	2016-03-20	10.335	-109.276	0_250m	230	Porifera	Porifera	Porifera	NA	NA	4	Sponge	NA
Drop cam	Drop cam_14	14	2016-03-20	10.335	-109.276	0_250m	230	Cnidaria	Anthozoa	Alcyonacea	Gorgoniidae	Leptogorgia styx	60	Gorgonian	NA
Drop cam	Drop cam_14	14	2016-03-20	10.335	-109.276	0_250m	230	Chordata	Chondrichthyes	Squaliformes	Echinorhinidae	Echinorhinus cookei	1	Prickly shark	NA
Drop cam	Drop cam_2	2	2016-03-13	10.2641	-109.233	501_1000m	754	Cnidaria	Anthozoa	Actiniaria	Liponematidae	Liponema brevicornis	1	Anemone	NA
Drop cam	Drop cam_2	2	2016-03-13	10.2641	-109.233	501_1000m	754	Cnidaria	Anthozoa	Antipatharia	Aphanipathidae	NA	17		NA
Drop cam	Drop cam_2	2	2016-03-13	10.2641	-109.233	501_1000m	754	Chordata	Actinopterygii	Perciformes	Percophidae	NA	1	NA	NA
Drop cam	Drop cam_2	2	2016-03-13	10.2641	-109.233	501_1000m	754	Chordata	Actinopterygii	Gadiformes	Macrouridae	Bathygadus sp	7	Grenadiers	NA
Drop cam	Drop cam_2	2	2016-03-13	10.2641	-109.233	501_1000m	754	Arthropoda	Malacostraca	Decapoda	Aristeidae	NA	2	Gamba shrimps	NA
Drop cam	Drop cam_2	2	2016-03-13	10.2641	-109.233	501_1000m	754	Echinodermata	Asteroidea	Paxillosida	Astropectinidae	NA	2	Star fish	NA
Drop cam	Drop cam_2	2	2016-03-13	10.2641	-109.233	501_1000m	754	Cnidaria	Anthozoa	Actiniaria	Boloceroididae	NA	1	Anemone	NA
Drop cam	Drop cam_2	2	2016-03-13	10.2641	-109.233	501_1000m	754	Chordata	Chondrichthyes	Carcharhiniformes	Scyliorhinidae	Apristurus spp	2	Catshark	NA
Drop cam	Drop cam_2	2	2016-03-13	10.2641	-109.233	501_1000m	754	Arthropoda	Malacostraca	Decapoda	Galatheidae	Munida hispida	100	Squat lobsters	NA
Drop cam	Drop cam_2	2	2016-03-13	10.2641	-109.233	501_1000m	754	Porifera	Hexactinellida	Hexactinosida	Farreidae	Farrea spp	1	Sponge	NA
Drop cam	Drop cam_3	3	2016-03-14	10.2955	-109.282	1001_1500m	1126	Chordata	Chondrichthyes	Chimaeriformes	Chimaeridae	Hydrolagus sp.	2	Purple chimaera	NA
Drop cam	Drop cam_3	3	2016-03-14	10.2955	-109.282	1001_1500m	1126	Chordata	Chondrichthyes	Carcharhiniformes	Scyliorhinidae	Apristurus spp	1	Catshark	NA
Drop cam	Drop cam_3	3	2016-03-14	10.2955	-109.282	1001_1500m	1126	Arthropoda	Malacostraca	Decapoda	Aristeidae	NA	12	White shrimp	NA
Drop cam	Drop cam_3	3	2016-03-14	10.2955	-109.282	1001_1500m	1126	Arthropoda	Malacostraca	Decapoda	Aristeidae	NA	5	Gamba shrimps	NA
Drop cam	Drop cam_3	3	2016-03-14	10.2955	-109.282	1001_1500m	1126	Arthropoda	Malacostraca	Decapoda	Galatheidae	Munida hispida	1	Squat lobsters	NA
Drop cam	Drop cam_3	3	2016-03-14	10.2955	-109.282	1001_1500m	1126	Chordata	Actinopterygii	Gadiformes	Macrouridae	Bathygadus sp	5	Grenadiers	NA
Drop cam	Drop cam_3	3	2016-03-14	10.2955	-109.282	1001_1500m	1126	Porifera	Hexactinellida	Hexactinellida	NA	NA	1	NA	NA
Drop cam	Drop cam_3	3	2016-03-14	10.2955	-109.282	1001_1500m	1126	Cnidaria	Anthozoa	Alcyonacea	Coralliidae	Corallium spp	2		NA
Drop cam	Drop cam_4	4	2016-03-14	10.2992	-109.271	501_1000m	925	Chordata	Actinopterygii	Gadiformes	Macrouridae	Bathygadus sp	2	Grenadiers	NA
Drop cam	Drop cam_4	4	2016-03-14	10.2992	-109.271	501_1000m	925	Arthropoda	Malacostraca	Decapoda	Aristeidae	NA	50	White shrimp	NA
Drop cam	Drop cam_4	4	2016-03-14	10.2992	-109.271	501_1000m	925	Arthropoda	Malacostraca	Decapoda	Lithodidae	Lithodes nintokuae	4	King crab	NA
Drop cam	Drop cam_5	5	2016-03-15	10.3497	-109.251	251_500m	411	Cnidaria	Scyphozoa	Scyphozoa	NA	NA	1	Sea floater	NA
Drop cam	Drop cam_5	5	2016-03-15	10.3497	-109.251	251_500m	411	Arthropoda	Malacostraca	Decapoda	Aristeidae	NA	25	White shrimp	NA
Drop cam	Drop cam_5	5	2016-03-15	10.3497	-109.251	251_500m	411	Chordata	Actinopterygii	Scorpaeniformes	Scorpaenidae	Scorpaenodes rubrivinctus	1	Scorpion fish	NA
Drop cam	Drop cam_5	5	2016-03-15	10.3497	-109.251	251_500m	411	Cnidaria	Scyphozoa	Scyphozoa	NA	NA	1	Jelly fish	NA
Drop cam	Drop cam_5	5	2016-03-15	10.3497	-109.251	251_500m	411	Arthropoda	Malacostraca	Decapoda	Calappidae	Platymera gaudichaudii	4	Armed box crab	NA
Drop cam	Drop cam_6	6	2016-03-15	10.3723	-109.265	501_1000m	696	Cnidaria	Scyphozoa	Scyphozoa	NA	NA	1	Jelly fish	NA
Drop cam	Drop cam_6	6	2016-03-15	10.3723	-109.265	501_1000m	696	Cnidaria	Scyphozoa	Scyphozoa	NA	NA	1	Jelly fish	NA
Drop cam	Drop cam_6	6	2016-03-15	10.3723	-109.265	501_1000m	696	Echinodermata	Asteroidea	Spinulosida	Echinasteridae		200	Star fish	NA
Drop cam	Drop cam_6	6	2016-03-15	10.3723	-109.265	501_1000m	696	Annelida	Polychaeta	Polychaeta	NA	NA	1	Sea worm	NA
Drop cam	Drop cam_7	7	2016-03-16	10.3072	-109.18	501_1000m	895	Arthropoda	Malacostraca	Decapoda	Lithodidae	Lithodes nintokuae	1	King crab	NA
Drop cam	Drop cam_7	7	2016-03-16	10.3072	-109.18	501_1000m	895	Arthropoda	Malacostraca	Decapoda	Galatheidae	Munida hispida	100	Squat lobsters	NA
Drop cam	Drop cam_7	7	2016-03-16	10.3072	-109.18	501_1000m	895	Chordata	Chondrichthyes	Squaliformes	Echinorhinidae	Echinorhinus cookei	1	Prickly shark	NA
Drop cam	Drop cam_7	7	2016-03-16	10.3072	-109.18	501_1000m	895	Porifera	Porifera	Porifera	NA	NA	1		NA
Drop cam	Drop cam_7	7	2016-03-16	10.3072	-109.18	501_1000m	895	Cnidaria	Anthozoa	Actiniaria	NA	NA	1		NA
Drop cam	Drop cam_7	7	2016-03-16	10.3072	-109.18	501_1000m	895	Arthropoda	Malacostraca	Decapoda	Aristeidae	NA	100	Gamba shrimps	NA
Drop cam	Drop cam_7	7	2016-03-16	10.3072	-109.18	501_1000m	895	Chordata	Chondrichthyes	Squaliformes	Echinorhinidae	Echinorhinus cookei	1	Prickly shark	NA
Drop cam	Drop cam_7	7	2016-03-16	10.3072	-109.18	501_1000m	895	Echinodermata	Asteroidea	Paxillosida	Astropectinidae		1		NA
Drop cam	Drop cam_8	8	2016-03-16	10.3077	-109.176	501_1000m	967	Arthropoda	Malacostraca	Decapoda	Aristeidae	NA	5		NA
Drop cam	Drop cam_8	8	2016-03-16	10.3077	-109.176	501_1000m	967	Cnidaria	Anthozoa	Antipatharia	Antipathidae	Stichopathes sp	2		NA
Drop cam	Drop cam_8	8	2016-03-16	10.3077	-109.176	501_1000m	967	Chordata	Actinopterygii	Ophidiiformes	Ophidiidae	Lamprogrammus cf. niger	1	Cusk eel	NA
Drop cam	Drop cam_8	8	2016-03-16	10.3077	-109.176	501_1000m	967	Arthropoda	Malacostraca	Decapoda	Lithodidae	Lithodes nintokuae	8	King crab	NA
Sub	Sub_2428	2428	2016-03-13	10.2953	-109.231	0_250m	166	Cnidaria	Anthozoa	Scleractinia	Caryophylliidae	NA	2	cup coral	NA
Sub	Sub_2428	2428	2016-03-13	10.2953	-109.231	251_500m	252	Annelida	Polychaeta	Polychaeta	NA	NA	2	polychaeta	NA
Sub	Sub_2428	2428	2016-03-13	10.2953	-109.231	0_250m	105	Cnidaria	Cnidaria	Cnidaria	NA	NA	1	jellyfish	NA
Sub	Sub_2428	2428	2016-03-13	10.2953	-109.231	0_250m	240	Cnidaria	Anthozoa	Alcyonacea	Acanthogorgiidae	NA	20	gorgonians	NA
Sub	Sub_2428	2428	2016-03-13	10.2953	-109.231	0_250m	1	Chordata	Actinopterygii	Perciformes	Carangidae	Elagatis bipinnulata	14	rainbow runner	NA
Sub	Sub_2428	2428	2016-03-13	10.2953	-109.231	251_500m	252	Porifera	Porifera	Porifera	NA	NA	12	sponge	NA
Sub	Sub_2428	2428	2016-03-13	10.2953	-109.231	251_500m	261	Chordata	Chondrichthyes	Carcharhiniformes	Carcharhinidae	Galeocerdo cuvier	1	tiger shark	NA
Sub	Sub_2428	2428	2016-03-13	10.2953	-109.231	0_250m	136	Chordata	Actinopterygii	Perciformes	Carangidae	Caranx lugubris	2	blackjack	NA
Sub	Sub_2428	2428	2016-03-13	10.2953	-109.231	0_250m	237	Chordata	Actinopterygii	Scorpaeniformes	Scorpaenidae	Pontinus vaughani	9	scorpion fish	NA
Sub	Sub_2428	2428	2016-03-13	10.2953	-109.231	0_250m	219	Arthropoda	Malacostraca	Decapoda	Calappidae	NA	1	crab	NA
Sub	Sub_2428	2428	2016-03-13	10.2953	-109.231	0_250m	248	Arthropoda	Malacostraca	Decapoda	Calappidae	Platymera gaudichaudii	2	crab	NA
Sub	Sub_2428	2428	2016-03-13	10.2953	-109.231	0_250m	145	Chordata	Chondrichthyes	Carcharhiniformes	Carcharhinidae	Carcharhinus albimarginatus	3	silvertip shark	NA
Sub	Sub_2428	2428	2016-03-13	10.2953	-109.231	0_250m	174	Arthropoda	Malacostraca	Decapoda	Calappidae	NA	1	painted crab	NA
Sub	Sub_2429	2429	2016-03-14	10.295	-109.233	0_250m	180	Chordata	Actinopterygii	Scorpaeniformes	Scorpaenidae	Pontinus vaughani	5	Pontinus vaughani	NA
Sub	Sub_2429	2429	2016-03-14	10.295	-109.233	0_250m	167	Chordata	Anguilliformes	Muraenidae	Muraeninae	Gymnothorax spp	1	moray eel	NA
Sub	Sub_2429	2429	2016-03-14	10.295	-109.233	0_250m	182	Annelida	Polychaeta	Polychaeta	NA	NA	1	Polychaet	NA
Sub	Sub_2429	2429	2016-03-14	10.295	-109.233	0_250m	167	Cnidaria	Anthozoa	Scleractinia	Caryophylliidae	NA	1	cup coral	NA
Sub	Sub_2429	2429	2016-03-14	10.295	-109.233	0_250m	55	Chordata	Chondrichthyes	Carcharhiniformes	Carcharhinidae	Carcharhinus falciformis	10	silky shark	NA
Sub	Sub_2429	2429	2016-03-14	10.295	-109.233	0_250m	180	Chordata	Actinopterygii	Perciformes	Carangidae	NA	2	jack	NA
Sub	Sub_2429	2429	2016-03-14	10.295	-109.233	0_250m	180	Cnidaria	Anthozoa	Alcyonacea	Acanthogorgiidae	NA	50	gorgonians	NA
Sub	Sub_2429	2429	2016-03-14	10.295	-109.233	0_250m	180	Chordata	Actinopterygii	Perciformes	Scorpaenidae	NA	15	scorpion fish	NA
Sub	Sub_2429	2429	2016-03-14	10.295	-109.233	0_250m	115	Chordata	Actinopterygii	Perciformes	Carangidae	Elagatis bipinnulata	2	rainbow runner	NA
Sub	Sub_2429	2429	2016-03-14	10.295	-109.233	0_250m	35	Chordata	Actinopterygii	Perciformes	Scombridae	Scomber japonicus	1	mackerel	NA
Sub	Sub_2429	2429	2016-03-14	10.295	-109.233	0_250m	186	Arthropoda	Malacostraca	Decapoda	Calappidae	NA	1	crab	NA
Sub	Sub_2429	2429	2016-03-14	10.295	-109.233	0_250m	115	Chordata	Actinopterygii	Perciformes	Scombridae	Thunnus albacares	1	yellowfin tuna	NA
Sub	Sub_2429	2429	2016-03-14	10.295	-109.233	0_250m	88	Cnidaria	Cnidaria	Cnidaria	NA	NA	1	jellyfish	NA
Sub	Sub_2429	2429	2016-03-14	10.295	-109.233	0_250m	182	Porifera	Porifera	Porifera	NA	NA	32	sponge	NA
Sub	Sub_2429	2429	2016-03-14	10.295	-109.233	0_250m	182	Cnidaria	Hydrozoa	Hydrozoa	NA	NA	116	hydrozoan	NA
Sub	Sub_2430	2430	2016-03-14	10.2926	-109.23	0_250m	100	Chordata	Actinopterygii	Perciformes	Epinephelidae	Dermatolepis dermatolepis	6	leather bass	NA
Sub	Sub_2430	2430	2016-03-14	10.2926	-109.23	0_250m	100	Arthropoda	Malacostraca	Decapoda	Calappidae	Platymera gaudichaudii	1	crab	NA
Sub	Sub_2430	2430	2016-03-14	10.2926	-109.23	0_250m	92	Chordata	Actinopterygii	Anguilliformes	Muraenidae	NA	1	Moray	NA
Sub	Sub_2430	2430	2016-03-14	10.2926	-109.23	0_250m	124	Chordata	Actinopterygii	Beryciformes	Holocentridae	Myripristis spp	1	soldierfish	NA
Sub	Sub_2430	2430	2016-03-14	10.2926	-109.23	0_250m	100	Cnidaria	Anthozoa	Alcyonacea	Gorgoniidae	Leptogorgia styx	18	gorgonians	NA
Sub	Sub_2430	2430	2016-03-14	10.2926	-109.23	0_250m	117	Chordata	Chondrichthyes	Carcharhiniformes	Sphyrnidae	Sphyrna lewini	1	hammerhead	NA
Sub	Sub_2430	2430	2016-03-14	10.2926	-109.23	0_250m	79	Chordata	Chondrichthyes	Carcharhiniformes	Carcharhinidae	Carcharhinus falciformis	4	silky shark	NA
Sub	Sub_2430	2430	2016-03-14	10.2926	-109.23	0_250m	100	Chordata	Actinopterygii	Syngnathiformes	Aulostomidae	Aulostomus chinensis	1	trumpetfish	NA
Sub	Sub_2430	2430	2016-03-14	10.2926	-109.23	0_250m	87	Chordata	Actinopterygii	Perciformes	Serranidae	Paranthias colonus	50	creole fish	NA
Sub	Sub_2430	2430	2016-03-14	10.2926	-109.23	0_250m	158	Chordata	Actinopterygii	Perciformes	Epinephelidae	Epinephelus cifuentesi	6	olive grouper	NA
Sub	Sub_2430	2430	2016-03-14	10.2926	-109.23	0_250m	103	Chordata	Actinopterygii	Perciformes	Scombridae	Thunnus albacares	1	yellowfin tuna	NA
Sub	Sub_2430	2430	2016-03-14	10.2926	-109.23	0_250m	100	Chordata	Actinopterygii	Perciformes	Pomacentridae	Chromis spp	6	cup coral	NA
Sub	Sub_2430	2430	2016-03-14	10.2926	-109.23	0_250m	84	Chordata	Actinopterygii	Perciformes	Kyphosidae	Kyphosus spp	1	chopa	NA
Sub	Sub_2430	2430	2016-03-14	10.2926	-109.23	0_250m	84	Chordata	Actinopterygii	Perciformes	Carangidae	Seriola rivioliana	10	amberjack	NA
Sub	Sub_2430	2430	2016-03-14	10.2926	-109.23	0_250m	100	Chordata	Actinopterygii	Perciformes	Labridae	Bodianus diplotaenia	1	mexican hogfish	NA
Sub	Sub_2430	2430	2016-03-14	10.2926	-109.23	0_250m	103	Chordata	Actinopterygii	Perciformes	Carangidae	Caranx melampygus	5	bluefin trevally	NA
Sub	Sub_2430	2430	2016-03-14	10.2926	-109.23	0_250m	103	Chordata	Actinopterygii	Perciformes	Carangidae	Caranx lugubris	2	blackjack	NA
Sub	Sub_2430	2430	2016-03-14	10.2926	-109.23	0_250m	100	Chordata	Actinopterygii	Perciformes	Pomacanthidae	Holacanthus limbaughi	3	clipperton angel fish	NA
Sub	Sub_2430	2430	2016-03-14	10.2926	-109.23	0_250m	215	Chordata	Actinopterygii	Scorpaeniformes	Scorpaenidae	Pontinus vaughani	2	scorpion fish	NA
Sub	Sub_2431	2431	2016-03-15	10.2929	-109.23	0_250m	117	Cnidaria	Cnidaria	Cnidaria	NA	NA	1	jellyfish	NA
Sub	Sub_2431	2431	2016-03-15	10.2929	-109.23	0_250m	184	Cnidaria	Anthozoa	Alcyonacea	Gorgoniidae	Leptogorgia styx	10	gorgonians	NA
Sub	Sub_2431	2431	2016-03-15	10.2929	-109.23	0_250m	111	Chordata	Chondrichthyes	Carcharhiniformes	Carcharhinidae	Carcharhinus albimarginatus	1	silvertip shark	NA
Sub	Sub_2431	2431	2016-03-15	10.2929	-109.23	0_250m	159	Bryozoa	Bryozoa	Bryozoa	NA	NA	110	bryozoan	NA
Sub	Sub_2431	2431	2016-03-15	10.2929	-109.23	0_250m	0	Chordata	Actinopterygii	Perciformes	Scombridae	Acanthocybium solandri	1	wahoo	NA
Sub	Sub_2431	2431	2016-03-15	10.2929	-109.23	0_250m	78	Chordata	Actinopterygii	Perciformes	Carangidae	Caranx melampygus	1	bluefin trevally	NA
Sub	Sub_2431	2431	2016-03-15	10.2929	-109.23	0_250m	120	Chordata	Actinopterygii	Perciformes	Pomacentridae	Chromis alta	5	damselfish	NA
Sub	Sub_2431	2431	2016-03-15	10.2929	-109.23	0_250m	159	Cnidaria	Anthozoa	Scleractinia	Caryophylliidae	Coenosmilia inordinata	5	cup coral	NA
Sub	Sub_2431	2431	2016-03-15	10.2929	-109.23	0_250m	80	Chordata	Actinopterygii	Perciformes	Labridae	Bodianus diplotaenia	2	mexican hogfish	NA
Sub	Sub_2431	2431	2016-03-15	10.2929	-109.23	0_250m	150	Chordata	Actinopterygii	Scorpaeniformes	Sebastidae	Sebastolobus altivelis	1	jack	NA
Sub	Sub_2431	2431	2016-03-15	10.2929	-109.23	0_250m	117	Chordata	Actinopterygii	Scorpaeniformes	Scorpaenidae	Pontinus vaughani	13	scorpion fish	NA
Sub	Sub_2431	2431	2016-03-15	10.2929	-109.23	0_250m	120	Chordata	Actinopterygii	Perciformes	Serranidae	NA	3	grouper	NA
Sub	Sub_2431	2431	2016-03-15	10.2929	-109.23	0_250m	80	Chordata	Actinopterygii	Perciformes	Epinephelidae	Epinephelus cifuentesi	14	olive grouper	NA
Sub	Sub_2431	2431	2016-03-15	10.2929	-109.23	0_250m	0	Chordata	Actinopterygii	Perciformes	Carangidae	Caranx lugubris	2	blackjack	NA
Sub	Sub_2431	2431	2016-03-15	10.2929	-109.23	0_250m	184	Arthropoda	Malacostraca	Decapoda	Calappidae	Platymera gaudichaudii	1	crab	NA
Sub	Sub_2431	2431	2016-03-15	10.2929	-109.23	0_250m	78	Chordata	Chondrichthyes	Carcharhiniformes	Sphyrnidae	Sphyrna lewini	2	hammerhead	NA
Sub	Sub_2431	2431	2016-03-15	10.2929	-109.23	0_250m	132	Chordata	Actinopterygii	Perciformes	Scombridae	Thunnus albacares	1000	yellowfin tuna	NA
Sub	Sub_2431	2431	2016-03-15	10.2929	-109.23	0_250m	120	Chordata	Actinopterygii	Anguilliformes	Muraenidae	NA	3	Moray	NA
Sub	Sub_2431	2431	2016-03-15	10.2929	-109.23	0_250m	80	Chordata	Actinopterygii	Perciformes	Pomacanthidae	Holacanthus clarionensis	1	clarion angelfish	NA
Sub	Sub_2431	2431	2016-03-15	10.2929	-109.23	0_250m	159	Chordata	Actinopterygii	Ophidiiformes	Bythitidae	NA	1	Brotula	NA
Sub	Sub_2431	2431	2016-03-15	10.2929	-109.23	0_250m	120	Chordata	Actinopterygii	Perciformes	Carangidae	Caranx dumerili	1	Seriola	NA
Sub	Sub_2431	2431	2016-03-15	10.2929	-109.23	0_250m	159	Arthropoda	Malacostraca	Decapoda	Epialtidae	Stenocionops sp	3	crab	NA
Sub	Sub_2431	2431	2016-03-15	10.2929	-109.23	0_250m	80	Chordata	Actinopterygii	Perciformes	Serranidae	Paranthias colonus	1	creole fish	NA
Sub	Sub_2431	2431	2016-03-15	10.2929	-109.23	0_250m	150	Porifera	Porifera	Porifera	NA	NA	2	sponge	NA
Sub	Sub_2431	2431	2016-03-15	10.2929	-109.23	0_250m	78	Chordata	Actinopterygii	Perciformes	Carangidae	Seriola rivioliana	1	amberjack	NA
Sub	Sub_2431	2431	2016-03-15	10.2929	-109.23	0_250m	120	Chordata	Actinopterygii	Perciformes	Epinephelidae	Dermatolepis dermatolepis	2	leather bass	NA
Sub	Sub_2431	2431	2016-03-15	10.2929	-109.23	0_250m	0	Chordata	Actinopterygii	Perciformes	Carangidae	Elagatis bipinnulata	1	rainbow runner	NA
Sub	Sub_2431	2431	2016-03-15	10.2929	-109.23	0_250m	45	Chordata	Chondrichthyes	Carcharhiniformes	Carcharhinidae	Carcharhinus galapagensis	2	galapagos shark	NA
Sub	Sub_2432	2432	2016-03-15	10.2903	-109.229	251_500m	300	Arthropoda	Malacostraca	Decapoda	Calappidae	NA	1	crab	NA
Sub	Sub_2432	2432	2016-03-15	10.2903	-109.229	251_500m	285	Arthropoda	Malacostraca	Decapoda	Calappidae	Platymera gaudichaudii	2	crab	NA
Sub	Sub_2432	2432	2016-03-15	10.2903	-109.229	0_250m	95	Chordata	Actinopterygii	Perciformes	Carangidae	Caranx lugubris	1	blackjack	NA
Sub	Sub_2432	2432	2016-03-15	10.2903	-109.229	251_500m	275	Chordata	Actinopterygii	Scorpaeniformes	Scorpaenidae	Pontinus vaughani	4	scorpion fish	NA
Sub	Sub_2432	2432	2016-03-15	10.2903	-109.229	251_500m	270	Cnidaria	Anthozoa	Alcyonacea	NA	NA	1	seafan	NA
Sub	Sub_2432	2432	2016-03-15	10.2903	-109.229	251_500m	287	Cnidaria	Hydrozoa	Hydrozoa	NA	NA	10	hydrozoan	NA
Sub	Sub_2432	2432	2016-03-15	10.2903	-109.229	0_250m	110	Chordata	Actinopterygii	Perciformes	Carangidae	Elagatis bipinnulata	26	rainbow runner	NA
Sub	Sub_2432	2432	2016-03-15	10.2903	-109.229	251_500m	284	Cnidaria	Anthozoa	Alcyonacea	Acanthogorgiidae	Acanthogorgia sp	2	gorgonians	NA
Sub	Sub_2432	2432	2016-03-15	10.2903	-109.229	0_250m	250	Porifera	Demospongiae	Agelasida	Agelasidae	NA	1	ear sponges	NA
Sub	Sub_2432	2432	2016-03-15	10.2903	-109.229	251_500m	270	Porifera	Porifera	Porifera	NA	NA	1	sponge	NA
Sub	Sub_2432	2432	2016-03-15	10.2903	-109.229	0_250m	95	Chordata	Actinopterygii	Perciformes	Carangidae	Caranx sexfasciatus	1	bigeye jack	NA
Sub	Sub_2432	2432	2016-03-15	10.2903	-109.229	0_250m	40	Chordata	Chondrichthyes	Carcharhiniformes	Carcharhinidae	Carcharhinus galapagensis	1	galapagos shark	NA
Sub	Sub_2432	2432	2016-03-15	10.2903	-109.229	251_500m	287	Echinodermata	Ophiuroidea	Ophiurida	Amphiuridae	Ophiothrix galapagensis	40	brittlestar	NA
Sub	Sub_2432	2432	2016-03-15	10.2903	-109.229	0_250m	250	Cnidaria	Anthozoa	Alcyonacea	Gorgoniidae	Leptogorgia styx	10	gorgonians	NA
Sub	Sub_2433	2433	2016-03-16	10.2837	-109.225	0_250m	199	Cnidaria	Anthozoa	Scleractinia	Caryophylliidae	Coenosmilia inordinata	10	cup coral	NA
Sub	Sub_2433	2433	2016-03-16	10.2837	-109.225	251_500m	290	Arthropoda	Malacostraca	Decapoda	Calappidae	Platymera gaudichaudii	1	crab	NA
Sub	Sub_2433	2433	2016-03-16	10.2837	-109.225	0_250m	180	Chordata	Actinopterygii	Perciformes	Epinephelidae	Epinephelus cifuentesi	10	olive grouper	NA
Sub	Sub_2433	2433	2016-03-16	10.2837	-109.225	251_500m	288	Chordata	Actinopterygii	Scorpaeniformes	Scorpaenidae	Pontinus vaughani	3	scorpion fish	NA
Sub	Sub_2433	2433	2016-03-16	10.2837	-109.225	0_250m	36	Chordata	Actinopterygii	Perciformes	Carangidae	Elagatis bipinnulata	1	rainbow runner	NA
Sub	Sub_2433	2433	2016-03-16	10.2837	-109.225	251_500m	259	Arthropoda	Malacostraca	Decapoda	Galatheidae	NA	1	squat lobster	NA
Sub	Sub_2433	2433	2016-03-16	10.2837	-109.225	0_250m	201	Arthropoda	Arthropoda	Arthropoda	NA	NA	1	crustacean	NA
Sub	Sub_2433	2433	2016-03-16	10.2837	-109.225	0_250m	246	Cnidaria	Anthozoa	Alcyonacea	Gorgoniidae	Leptogorgia styx	10	gorgonians	NA
Sub	Sub_2433	2433	2016-03-16	10.2837	-109.225	0_250m	159	Chordata	Chondrichthyes	Carcharhiniformes	Sphyrnidae	Sphyrna lewini	1	hammerhead	NA
Sub	Sub_2433	2433	2016-03-16	10.2837	-109.225	0_250m	166	Chordata	Chondrichthyes	Myliobatiformes	Myliobatidae	NA	10	mobula	NA
Sub	Sub_2433	2433	2016-03-16	10.2837	-109.225	251_500m	263	Porifera	Porifera	Porifera	NA	NA	22	sponge	NA
Sub	Sub_2433	2433	2016-03-16	10.2837	-109.225	0_250m	107	Chordata	Chondrichthyes	Carcharhiniformes	Carcharhinidae	Carcharhinus falciformis	2	silky shark	NA
Sub	Sub_2433	2433	2016-03-16	10.2837	-109.225	0_250m	246	Cnidaria	Anthozoa	Alcyonacea	Acanthogorgiidae	NA	1	gorgonians	NA
Sub	Sub_2433	2433	2016-03-16	10.2837	-109.225	251_500m	286	Cnidaria	Scyphozoa	Semaeostomeae	Ulmaridae	Aurelia aurita	1	jellyfish	NA
Sub	Sub_2433	2433	2016-03-16	10.2837	-109.225	0_250m	136	Chordata	Chondrichthyes	Carcharhiniformes	Carcharhinidae	Carcharhinus albimarginatus	1	silvertip shark	NA
Sub	Sub_2433	2433	2016-03-16	10.2837	-109.225	251_500m	280	Arthropoda	Malacostraca	Decapoda	Calappidae	NA	4	crab	NA
Sub	Sub_2433	2433	2016-03-16	10.2837	-109.225	251_500m	280	Echinodermata	Ophiuroidea	Ophiurida	Amphiuridae	Ophiothrix galapagensis	5	brittlestar	NA
Sub	Sub_2433	2433	2016-03-16	10.2837	-109.225	0_250m	150	Chordata	Actinopterygii	Perciformes	Scombridae	NA	1	tuna	NA
Sub	Sub_2433	2433	2016-03-16	10.2837	-109.225	0_250m	153	Chordata	Actinopterygii	Perciformes	Carangidae	Caranx lugubris	1	blackjack	NA
Sub	Sub_2433	2433	2016-03-16	10.2837	-109.225	0_250m	230	Cnidaria	Hydrozoa	Siphonophorae	NA	NA	3	siphonophora	NA
Sub	Sub_2434	2434	2016-03-16	10.2858	-109.226	251_500m	270	Cnidaria	Anthozoa	Alcyonacea	Gorgoniidae	Leptogorgia styx	60	gorgonians	NA
Sub	Sub_2434	2434	2016-03-16	10.2858	-109.226	0_250m	100	Chordata	Actinopterygii	Perciformes	Epinephelidae	Dermatolepis dermatolepis	1	leather bass	NA
Sub	Sub_2434	2434	2016-03-16	10.2858	-109.226	0_250m	150	Chordata	Chondrichthyes	Carcharhiniformes	Carcharhinidae	Carcharhinus galapagensis	1	galapagos shark	NA
Sub	Sub_2434	2434	2016-03-16	10.2858	-109.226	0_250m	110	Chordata	Actinopterygii	Perciformes	Labridae	Bodianus diplotaenia	1	mexican hogfish	NA
Sub	Sub_2434	2434	2016-03-16	10.2858	-109.226	0_250m	38	Chordata	Chondrichthyes	Carcharhiniformes	Carcharhinidae	Carcharhinus falciformis	3	silky shark	NA
Sub	Sub_2434	2434	2016-03-16	10.2858	-109.226	0_250m	100	Chordata	Chondrichthyes	Carcharhiniformes	Carcharhinidae	Carcharhinus albimarginatus	2	silvertip shark	NA
Sub	Sub_2434	2434	2016-03-16	10.2858	-109.226	0_250m	245	Cnidaria	Anthozoa	Alcyonacea	Acanthogorgiidae	NA	20	gorgonians	NA
Sub	Sub_2434	2434	2016-03-16	10.2858	-109.226	0_250m	152	Chordata	Actinopterygii	Scorpaeniformes	Scorpaenidae	Pontinus vaughani	2	scorpion fish	NA
Sub	Sub_2434	2434	2016-03-16	10.2858	-109.226	0_250m	150	Chordata	Actinopterygii	Perciformes	Carangidae	Caranx lugubris	1	blackjack	NA
Sub	Sub_2434	2434	2016-03-16	10.2858	-109.226	0_250m	100	Chordata	Actinopterygii	Perciformes	Carangidae	Caranx sexfasciatus	1	bigeye jack	NA
Sub	Sub_2434	2434	2016-03-16	10.2858	-109.226	0_250m	195	Cnidaria	Anthozoa	Anthozoa	NA	NA	10	coral	NA
Sub	Sub_2434	2434	2016-03-16	10.2858	-109.226	0_250m	195	Cnidaria	Anthozoa	Scleractinia	Caryophylliidae	Coenosmilia inordinata	25	cup coral	NA
Sub	Sub_2434	2434	2016-03-16	10.2858	-109.226	0_250m	110	Chordata	Actinopterygii	Perciformes	Pomacanthidae	Holacanthus clarionensis	100	clarion angelfish	NA
Sub	Sub_2434	2434	2016-03-16	10.2858	-109.226	251_500m	270	Echinodermata	Ophiuroidea	Ophiurida	Amphiuridae	Ophiothrix galapagensis	50	brittlestar	NA
Sub	Sub_2434	2434	2016-03-16	10.2858	-109.226	0_250m	110	Chordata	Actinopterygii	Perciformes	Serranidae	Paranthias colonus	100	creole fish	NA
Sub	Sub_2434	2434	2016-03-16	10.2858	-109.226	251_500m	270	Arthropoda	Malacostraca	Decapoda	Calappidae	NA	1	crab	NA
Sub	Sub_2434	2434	2016-03-16	10.2858	-109.226	0_250m	124	Chordata	Actinopterygii	Perciformes	Carangidae	Seriola rivioliana	2	almaco jack	NA
Sub	Sub_2434	2434	2016-03-16	10.2858	-109.226	0_250m	172	Chordata	Actinopterygii	Perciformes	Epinephelidae	Epinephelus cifuentesi	16	olive grouper	NA
Sub	Sub_2434	2434	2016-03-16	10.2858	-109.226	251_500m	270	Porifera	Porifera	Porifera	NA	NA	2	sponge	NA
Sub	Sub_2434	2434	2016-03-16	10.2858	-109.226	0_250m	13	Chordata	Actinopterygii	Perciformes	Carangidae	Elagatis bipinnulata	16	rainbow runner	NA
Sub	Sub_2435	2435	2016-03-17	10.2856	-109.224	0_250m	123	Chordata	Actinopterygii	Perciformes	Carangidae	Seriola dorsalis	1	jack	NA
Sub	Sub_2435	2435	2016-03-17	10.2856	-109.224	0_250m	82	Chordata	Actinopterygii	Perciformes	Carangidae	Caranx lugubris	3	blackjack	NA
Sub	Sub_2435	2435	2016-03-17	10.2856	-109.224	0_250m	78	Chordata	Chondrichthyes	Carcharhiniformes	Sphyrnidae	Sphyrna lewini	62	hammerhead	NA
Sub	Sub_2435	2435	2016-03-17	10.2856	-109.224	0_250m	67	Chordata	Actinopterygii	Perciformes	Scombridae	Acanthocybium solandri	2	wahoo	NA
Sub	Sub_2435	2435	2016-03-17	10.2856	-109.224	0_250m	82	Chordata	Actinopterygii	Perciformes	Scombridae	Thunnus albacares	1	yellowfin tuna	NA
Sub	Sub_2435	2435	2016-03-17	10.2856	-109.224	0_250m	214	Cnidaria	Anthozoa	Alcyonacea	Gorgoniidae	Leptogorgia styx	10	gorgonians	NA
Sub	Sub_2435	2435	2016-03-17	10.2856	-109.224	0_250m	123	Chordata	Actinopterygii	Perciformes	Lutjanidae	Lutjanid spp	2	snapper	NA
Sub	Sub_2435	2435	2016-03-17	10.2856	-109.224	0_250m	178	Arthropoda	Malacostraca	Decapoda	Calappidae	NA	2	crab	NA
Sub	Sub_2435	2435	2016-03-17	10.2856	-109.224	0_250m	211	Porifera	Porifera	Porifera	NA	NA	1	sponge	NA
Sub	Sub_2435	2435	2016-03-17	10.2856	-109.224	0_250m	102	Chordata	Chondrichthyes	Carcharhiniformes	Carcharhinidae	Carcharhinus albimarginatus	1	silvertip shark	NA
Sub	Sub_2435	2435	2016-03-17	10.2856	-109.224	0_250m	193	Cnidaria	Anthozoa	Alcyonacea	Acanthogorgiidae	NA	1	gorgonians	NA
Sub	Sub_2435	2435	2016-03-17	10.2856	-109.224	0_250m	82	Chordata	Actinopterygii	Perciformes	Scombridae	Euthynnus lineatus	200	bonito	NA
Sub	Sub_2435	2435	2016-03-17	10.2856	-109.224	0_250m	102	Chordata	Actinopterygii	Perciformes	Labridae	Bodianus diplotaenia	1	mexican hogfish	NA
Sub	Sub_2435	2435	2016-03-17	10.2856	-109.224	0_250m	102	Chordata	Actinopterygii	Tetraodontiformes	Monacanthidae	NA	1	filefish	NA
Sub	Sub_2435	2435	2016-03-17	10.2856	-109.224	0_250m	220	Chordata	Chondrichthyes	Myliobatiformes	Myliobatidae	NA	1	mobula	NA
Sub	Sub_2435	2435	2016-03-17	10.2856	-109.224	0_250m	222	Cnidaria	Hydrozoa	Siphonophorae		NA	1	siphonophora	NA
Sub	Sub_2435	2435	2016-03-17	10.2856	-109.224	0_250m	220	Chordata	Chondrichthyes	Chondrichthyes	Chondrichthyes	Chondrichthyes	3	shark	NA
Sub	Sub_2435	2435	2016-03-17	10.2856	-109.224	0_250m	66	Chordata	Actinopterygii	Perciformes	Carangidae	Caranx melampygus	5	bluefin trevally	NA
Sub	Sub_2435	2435	2016-03-17	10.2856	-109.224	0_250m	0	Chordata	Actinopterygii	Perciformes	Carangidae	Caranx sexfasciatus	2	bigeye jack	NA
Sub	Sub_2435	2435	2016-03-17	10.2856	-109.224	0_250m	197	Cnidaria	Anthozoa	Alcyonacea	NA	NA	10	soft corals	NA
Sub	Sub_2435	2435	2016-03-17	10.2856	-109.224	0_250m	82	Chordata	Actinopterygii	Perciformes	Carangidae	Elagatis bipinnulata	1	rainbow runner	NA
Sub	Sub_2435	2435	2016-03-17	10.2856	-109.224	0_250m	123	Chordata	Actinopterygii	Perciformes	Priacanthidae	Cookeolus japonicus	50	catalufa	NA
Sub	Sub_2435	2435	2016-03-17	10.2856	-109.224	0_250m	193	Chordata	Actinopterygii	Scorpaeniformes	Scorpaenidae	NA	3	scorpion fish	NA
Sub	Sub_2435	2435	2016-03-17	10.2856	-109.224	0_250m	221	Ctenophora	Ctenophora	Ctenophora	NA	NA	1	comb jelly	NA
Sub	Sub_2435	2435	2016-03-17	10.2856	-109.224	0_250m	123	Chordata	Actinopterygii	Perciformes	Pomacanthidae	Holacanthus limbaughi	1	clipperton angel fish	NA
Sub	Sub_2435	2435	2016-03-17	10.2856	-109.224	0_250m	102	Chordata	Chondrichthyes	Carcharhiniformes	Carcharhinidae	Carcharhinus galapagensis	2	galapagos shark	NA
Sub	Sub_2435	2435	2016-03-17	10.2856	-109.224	0_250m	214	Arthropoda	Malacostraca	Decapoda	Calappidae	Platymera gaudichaudii	1	crab	NA
Sub	Sub_2435	2435	2016-03-17	10.2856	-109.224	0_250m	214	Arthropoda	Malacostraca	Decapoda			1	spidercrab	NA
Sub	Sub_2435	2435	2016-03-17	10.2856	-109.224	0_250m	82	Chordata	Actinopterygii	Perciformes	Serranidae	Paranthias colonus	1000	creole fish	NA
Sub	Sub_2436	2436	2016-03-17	10.2843	-109.222	0_250m	100	Chordata	Actinopterygii	Perciformes	Scombridae	Katsuwonus pelamis	1	skipjack	NA
Sub	Sub_2436	2436	2016-03-17	10.2843	-109.222	0_250m	66	Chordata	Actinopterygii	Tetraodontiformes	Balistidae	Sufflamen spp	3	trigger fish	NA
Sub	Sub_2436	2436	2016-03-17	10.2843	-109.222	0_250m	113	Chordata	Actinopterygii	Perciformes	Pomacanthidae	NA	2	angelfish	NA
Sub	Sub_2436	2436	2016-03-17	10.2843	-109.222	0_250m	112	Echinodermata	Echinoidea	Diadematoida	Diadematidae	Echinothrix diadema	1	urchin	NA
Sub	Sub_2436	2436	2016-03-17	10.2843	-109.222	0_250m	97	Chordata	Actinopterygii	Perciformes	Scombridae	Thunnus albacares	1	yellowfin tuna	NA
Sub	Sub_2436	2436	2016-03-17	10.2843	-109.222	0_250m	68	Cnidaria	Anthozoa	Antipatharia	NA	NA	50	black coral	NA
Sub	Sub_2436	2436	2016-03-17	10.2843	-109.222	0_250m	62	Chordata	Chondrichthyes	Carcharhiniformes	Carcharhinidae	Carcharhinus galapagensis	3	galapagos shark	NA
Sub	Sub_2436	2436	2016-03-17	10.2843	-109.222	0_250m	35	Chordata	Chondrichthyes	Carcharhiniformes	Carcharhinidae	Carcharhinus falciformis	8	silky shark	NA
Sub	Sub_2436	2436	2016-03-17	10.2843	-109.222	0_250m	70	Chordata	Chondrichthyes	Carcharhiniformes	Carcharhinidae	Carcharhinus albimarginatus	1	silvertip shark	NA
Sub	Sub_2436	2436	2016-03-17	10.2843	-109.222	0_250m	129	Chordata	Actinopterygii	Perciformes	Labridae	Bodianus diplotaenia	1	mexican hogfish	NA
Sub	Sub_2436	2436	2016-03-17	10.2843	-109.222	0_250m	100	Chordata	Actinopterygii	Perciformes	Serranidae	Paranthias colonus	50	creole fish	NA
Sub	Sub_2436	2436	2016-03-17	10.2843	-109.222	0_250m	92	Chordata	Actinopterygii	Anguilliformes	Muraenidae	NA	3	Moray	NA
Sub	Sub_2436	2436	2016-03-17	10.2843	-109.222	0_250m	86	Chordata	Actinopterygii	Perciformes	Carangidae	Caranx sexfasciatus	1	bigeye jack	NA
Sub	Sub_2436	2436	2016-03-17	10.2843	-109.222	0_250m	129	Chordata	Actinopterygii	Perciformes	Carangidae	Seriola dorsalis	1	jack	NA
Sub	Sub_2436	2436	2016-03-17	10.2843	-109.222	0_250m	146	Chordata	Actinopterygii	Perciformes	Epinephelidae	Epinephelus cifuentesi	2	olive grouper	NA
Sub	Sub_2437	2437	2016-03-18	10.2837	-109.224	0_250m	60	Chordata	Chondrichthyes	Carcharhiniformes	Carcharhinidae	Carcharhinus falciformis	5	silky shark	NA
Sub	Sub_2437	2437	2016-03-18	10.2837	-109.224	0_250m	82	Chordata	Actinopterygii	Perciformes	Carangidae	NA	1	jack	NA
Sub	Sub_2437	2437	2016-03-18	10.2837	-109.224	0_250m	82	Chordata	Actinopterygii	Perciformes	Serranidae	Paranthias colonus	100	creole fish	NA
Sub	Sub_2437	2437	2016-03-18	10.2837	-109.224	0_250m	82	Chordata	Chondrichthyes	Carcharhiniformes	Carcharhinidae	Carcharhinus galapagensis	1	galapagos shark	NA
Sub	Sub_2437	2437	2016-03-18	10.2837	-109.224	0_250m	237	Cnidaria	Anthozoa	Alcyonacea	Acanthogorgiidae	NA	10	gorgonians	NA
Sub	Sub_2437	2437	2016-03-18	10.2837	-109.224	0_250m	82	Chordata	Actinopterygii	Tetraodontiformes	Balistidae	Sufflamen spp	2	trigger fish	NA
Sub	Sub_2437	2437	2016-03-18	10.2837	-109.224	0_250m	82	Chordata	Actinopterygii	Perciformes	Epinephelidae	Dermatolepis dermatolepis	1	leather bass	NA
Sub	Sub_2437	2437	2016-03-18	10.2837	-109.224	251_500m	252	Chordata	Actinopterygii	Scorpaeniformes	Scorpaenidae	Pontinus vaughani	2	scorpion fish	NA
Sub	Sub_2437	2437	2016-03-18	10.2837	-109.224	0_250m	237	Arthropoda	Malacostraca	Decapoda	Calappidae	Platymera gaudichaudii	1	crab	NA
Sub	Sub_2437	2437	2016-03-18	10.2837	-109.224	0_250m	82	Chordata	Chondrichthyes	Carcharhiniformes	Sphyrnidae	Sphyrna lewini	1	hammerhead	NA
Sub	Sub_2437	2437	2016-03-18	10.2837	-109.224	0_250m	82	Chordata	Actinopterygii	Perciformes	Carangidae	Seriola rivioliana	50	amberjack	NA
Sub	Sub_2437	2437	2016-03-18	10.2837	-109.224	0_250m	82	Chordata	Chondrichthyes	Carcharhiniformes	Carcharhinidae	Carcharhinus albimarginatus	1	silvertip shark	NA
Sub	Sub_2437	2437	2016-03-18	10.2837	-109.224	0_250m	82	Chordata	Actinopterygii	Perciformes	Kyphosidae	Kyphosus spp	50	chopa	NA
Sub	Sub_2437	2437	2016-03-18	10.2837	-109.224	251_500m	251	Porifera	Porifera	Porifera	NA	NA	2	sponge	NA
Sub	Sub_2437	2437	2016-03-18	10.2837	-109.224	0_250m	18	Chordata	Actinopterygii	Perciformes	Carangidae	Elagatis bipinnulata	1	rainbow runner	NA
Sub	Sub_2438	2438	2016-03-19	10.298	-109.22	0_250m	90	Chordata	Actinopterygii	Perciformes	Scombridae	Thunnus albacares	1	yellowfin tuna	NA
Sub	Sub_2438	2438	2016-03-19	10.298	-109.22	0_250m	3	Ctenophora	Ctenophora	Ctenophora	NA	NA	1	ctenophore	NA
Sub	Sub_2438	2438	2016-03-19	10.298	-109.22	0_250m	219	Cnidaria	Anthozoa	Anthozoa	NA	NA	100	octocorals	NA
Sub	Sub_2438	2438	2016-03-19	10.298	-109.22	0_250m	243	Porifera	Porifera	Porifera	NA	NA	1	sponge	NA
Sub	Sub_2438	2438	2016-03-19	10.298	-109.22	0_250m	227	Arthropoda	Malacostraca	Decapoda	Calappidae	NA	1	crab	NA
Sub	Sub_2438	2438	2016-03-19	10.298	-109.22	0_250m	229	Chordata	Actinopterygii	Perciformes	Carangidae	Caranx lugubris	3	blackjack	NA
Sub	Sub_2438	2438	2016-03-19	10.298	-109.22	0_250m	3	Cnidaria	Hydrozoa	Siphonophorae	NA	NA	1	siphonophora	NA
Sub	Sub_2438	2438	2016-03-19	10.298	-109.22	0_250m	104	Chordata	Actinopterygii	Perciformes	Pomacanthidae	Holacanthus limbaughi	1	clipperton angel fish	NA
Sub	Sub_2438	2438	2016-03-19	10.298	-109.22	0_250m	208	Cnidaria	Anthozoa	Antipatharia	NA	NA	50	black coral	NA
Sub	Sub_2438	2438	2016-03-19	10.298	-109.22	0_250m	239	Cnidaria	Cnidaria	Cnidaria	NA	NA	1	jellyfish	NA
Sub	Sub_2438	2438	2016-03-19	10.298	-109.22	0_250m	69	Chordata	Actinopterygii	Perciformes	Scombridae	Acanthocybium solandri	1	wahoo	NA
Sub	Sub_2438	2438	2016-03-19	10.298	-109.22	0_250m	194	Chordata	Actinopterygii	Perciformes	Epinephelidae	Epinephelus cifuentesi	1	olive grouper	NA
Sub	Sub_2438	2438	2016-03-19	10.298	-109.22	0_250m	90	Chordata	Actinopterygii	Perciformes	Carangidae	Seriola rivioliana	1	amberjack	NA
Sub	Sub_2438	2438	2016-03-19	10.298	-109.22	0_250m	34	Chordata	Actinopterygii	Perciformes	Carangidae	Elagatis bipinnulata	1	rainbow runner	NA
Sub	Sub_2438	2438	2016-03-19	10.298	-109.22	0_250m	234	Chordata	Actinopterygii	Scorpaeniformes	Scorpaenidae	Pontinus vaughani	2	scorpion fish	NA
Sub	Sub_2438	2438	2016-03-19	10.298	-109.22	0_250m	210	Arthropoda	Malacostraca	Mysidacea	NA	NA	1	mysid	NA
Sub	Sub_2438	2438	2016-03-19	10.298	-109.22	0_250m	208	Cnidaria	Anthozoa	Scleractinia	Caryophylliidae	NA	50	cup coral	NA
Sub	Sub_2438	2438	2016-03-19	10.298	-109.22	0_250m	224	Cnidaria	Hydrozoa	Hydrozoa	NA	NA	100	hydrozoan	NA
Sub	Sub_2438	2438	2016-03-19	10.298	-109.22	0_250m	90	Chordata	Chondrichthyes	Carcharhiniformes	Sphyrnidae	Sphyrna lewini	1	hammerhead	NA
Sub	Sub_2438	2438	2016-03-19	10.298	-109.22	0_250m	93	Chordata	Actinopterygii	Perciformes	Labridae	Bodianus diplotaenia	1	mexican hogfish	NA
Sub	Sub_2438	2438	2016-03-19	10.298	-109.22	0_250m	135	Chordata	Actinopterygii	Perciformes	Priacanthidae	Cookeolus japonicus	1	catalufa	NA
Sub	Sub_2438	2438	2016-03-19	10.298	-109.22	0_250m	34	Chordata	Chondrichthyes	Carcharhiniformes	Carcharhinidae	Carcharhinus falciformis	2	silky shark	NA
Sub	Sub_2438	2438	2016-03-19	10.298	-109.22	0_250m	93	Chordata	Actinopterygii	Tetraodontiformes	Balistidae	Sufflamen spp	1	trigger fish	NA
Sub	Sub_2438	2438	2016-03-19	10.298	-109.22	0_250m	90	Chordata	Actinopterygii	Perciformes	Epinephelidae	Dermatolepis dermatolepis	1	leather bass	NA
Sub	Sub_2438	2438	2016-03-19	10.298	-109.22	0_250m	194	Chordata	Actinopterygii	Perciformes	Carangidae	NA	1	jack	NA
Sub	Sub_2439	2439	2016-03-19	10.2851	-109.224	0_250m	200	Cnidaria	Anthozoa	Scleractinia	Caryophylliidae	NA	1	cup coral	NA
Sub	Sub_2439	2439	2016-03-19	10.2851	-109.224	0_250m	105	Chordata	Actinopterygii	Perciformes	Carangidae	Caranx lugubris	1	blackjack	NA
Sub	Sub_2439	2439	2016-03-19	10.2851	-109.224	0_250m	111	Chordata	Chondrichthyes	Carcharhiniformes	Carcharhinidae	Galeocerdo cuvier	1	tiger shark	NA
Sub	Sub_2439	2439	2016-03-19	10.2851	-109.224	0_250m	45	Cnidaria	Anthozoa	Scleractinia	NA	NA	50	coral	NA
Sub	Sub_2439	2439	2016-03-19	10.2851	-109.224	0_250m	230	Porifera	Porifera	Porifera	NA	NA	3	sponge	NA
Sub	Sub_2439	2439	2016-03-19	10.2851	-109.224	0_250m	128	Chordata	Actinopterygii	Perciformes	Carangidae	Seriola rivioliana	1	amberjack	NA
Sub	Sub_2439	2439	2016-03-19	10.2851	-109.224	0_250m	111	Chordata	Actinopterygii	Perciformes	Labridae	Bodianus diplotaenia	10	mexican hogfish	NA
Sub	Sub_2439	2439	2016-03-19	10.2851	-109.224	251_500m	300	Chordata	Actinopterygii	Scorpaeniformes	Scorpaenidae	Pontinus vaughani	4	scorpion fish	NA
Sub	Sub_2439	2439	2016-03-19	10.2851	-109.224	0_250m	56	Chordata	Actinopterygii	Perciformes	Scaridae	Scarus rubroviolaceus	1	bicolor parrot	NA
Sub	Sub_2439	2439	2016-03-19	10.2851	-109.224	0_250m	243	Cnidaria	Cnidaria	Cnidaria	NA	NA	4	jellyfish	NA
Sub	Sub_2439	2439	2016-03-19	10.2851	-109.224	251_500m	326	Chordata	Actinopterygii	Scorpaeniformes	Scorpaenidae	NA	11	scorpion fish	NA
Sub	Sub_2439	2439	2016-03-19	10.2851	-109.224	251_500m	329	Arthropoda	Malacostraca	Decapoda	Calappidae	Platymera gaudichaudii	2	crab	NA
Sub	Sub_2439	2439	2016-03-19	10.2851	-109.224	0_250m	121	Chordata	Actinopterygii	Perciformes	Serranidae	Paranthias colonus	50	creolefish	NA
Sub	Sub_2439	2439	2016-03-19	10.2851	-109.224	0_250m	105	Chordata	Actinopterygii	Perciformes	Epinephelidae	Dermatolepis dermatolepis	1	leather bass	NA
Sub	Sub_2439	2439	2016-03-19	10.2851	-109.224	0_250m	215	Cnidaria	Hydrozoa	Siphonophorae	NA	NA	1	siphonophora	NA
Sub	Sub_2439	2439	2016-03-19	10.2851	-109.224	0_250m	111	Chordata	Actinopterygii	Perciformes	Priacanthidae	NA	1	bigeye catalufa	NA
Sub	Sub_2439	2439	2016-03-19	10.2851	-109.224	0_250m	200	Chordata	Actinopterygii	Scorpaeniformes	Scorpaenidae	Pontinus vaughani	1	scorpion fish	NA
Sub	Sub_2439	2439	2016-03-19	10.2851	-109.224	0_250m	75	Chordata	Actinopterygii	Tetraodontiformes	Balistidae	Melichthys niger	1	black trigger	NA
Sub	Sub_2439	2439	2016-03-19	10.2851	-109.224	0_250m	172	Chordata	Actinopterygii	Perciformes	Serranidae	NA	75	grouper	NA
Sub	Sub_2439	2439	2016-03-19	10.2851	-109.224	0_250m	75	Chordata	Actinopterygii	Perciformes	Serranidae	Liopropoma fasciatum	1	rainbow basslet	NA
Sub	Sub_2439	2439	2016-03-19	10.2851	-109.224	0_250m	100	Chordata	Chondrichthyes	Carcharhiniformes	Carcharhinidae	Carcharhinus falciformis	6	silky shark	NA
Sub	Sub_2439	2439	2016-03-19	10.2851	-109.224	0_250m	75	Chordata	Actinopterygii	Tetraodontiformes	Balistidae	Sufflamen verres	1	trigger	NA
Sub	Sub_2439	2439	2016-03-19	10.2851	-109.224	0_250m	105	Chordata	Actinopterygii	Perciformes	Carangidae	Caranx melampygus	1	bluefin trevally	NA
Sub	Sub_2439	2439	2016-03-19	10.2851	-109.224	0_250m	115	Chordata	Actinopterygii	Perciformes	Pomacanthidae	Holacanthus limbaughi	2	Clipperton angelfish	NA
Sub	Sub_2439	2439	2016-03-19	10.2851	-109.224	0_250m	50	Cnidaria	Anthozoa	Alcyonacea	Acanthogorgiidae	NA	100	gorgonians	NA
Sub	Sub_2439	2439	2016-03-19	10.2851	-109.224	0_250m	105	Chordata	Actinopterygii	Perciformes	Mullidae	Mulloidichthys dentatus	1	mexican goatfish	NA
Sub	Sub_2439	2439	2016-03-19	10.2851	-109.224	0_250m	30	Chordata	Chondrichthyes	Carcharhiniformes	Carcharhinidae	Carcharhinus falciformis	4	silky shark	NA
Sub	Sub_2439	2439	2016-03-19	10.2851	-109.224	251_500m	301	Ctenophora	Ctenophora	Ctenophora	NA	NA	5	ctenophore	NA
Sub	Sub_2439	2439	2016-03-19	10.2851	-109.224	0_250m	204	Cnidaria	Hydrozoa	Hydrozoa	NA	NA	2	hydrozoan	NA
Sub	Sub_2439	2439	2016-03-19	10.2851	-109.224	0_250m	105	Chordata	Actinopterygii	Syngnathiformes	Aulostomidae	Aulostomus chinensis	1	trumpetfish	NA
Sub	Sub_2439	2439	2016-03-19	10.2851	-109.224	251_500m	280	Arthropoda	Malacostraca	Decapoda	Calappidae	NA	1	crab	NA
Sub	Sub_2439	2439	2016-03-19	10.2851	-109.224	0_250m	105	Chordata	Actinopterygii	Anguilliformes	Muraenidae	Gymnothorax dovii	1	moray eel	NA
Sub	Sub_2439	2439	2016-03-19	10.2851	-109.224	251_500m	298	Echinodermata	Ophiuroidea	Ophiurida	Amphiuridae	Ophiothrix galapagensis	5	brittlestar	NA
Sub	Sub_2440	2440	2016-03-20	10.2832	-109.22	0_250m	63	Chordata	Actinopterygii	Perciformes	Acanthuridae	Acanthurus nigricans	2	white cheek surgeonfish	NA
Sub	Sub_2440	2440	2016-03-20	10.2832	-109.22	0_250m	75	Chordata	Chondrichthyes	Carcharhiniformes	Carcharhinidae	Carcharhinus albimarginatus	1	silvertip shark	NA
Sub	Sub_2440	2440	2016-03-20	10.2832	-109.22	0_250m	126	Chordata	Actinopterygii	Perciformes	Chaetodontidae	Prognathodes falcifer	2	butterfly fish	NA
Sub	Sub_2440	2440	2016-03-20	10.2832	-109.22	0_250m	60	Chordata	Actinopterygii	Perciformes	Labridae	Bodianus diplotaenia	3	mexican hogfish	NA
Sub	Sub_2440	2440	2016-03-20	10.2832	-109.22	0_250m	67	Cnidaria	Anthozoa	Antipatharia	Antipathidae	Antipathes spp	2	black coral	NA
Sub	Sub_2440	2440	2016-03-20	10.2832	-109.22	0_250m	60	Chordata	Actinopterygii	Perciformes	Carangidae	Caranx lugubris	1	blackjack	NA
Sub	Sub_2440	2440	2016-03-20	10.2832	-109.22	0_250m	67	Chordata	Actinopterygii	Perciformes	Pomacentridae	Stegastes baldwini	1	clipperton gregory	NA
Sub	Sub_2440	2440	2016-03-20	10.2832	-109.22	0_250m	120	Chordata	Actinopterygii	Perciformes	Serranidae	NA	120	grouper	NA
Sub	Sub_2440	2440	2016-03-20	10.2832	-109.22	0_250m	160	Cnidaria	Anthozoa	Alcyonacea	Acanthogorgiidae	NA	1	gorgonians	NA
Sub	Sub_2440	2440	2016-03-20	10.2832	-109.22	0_250m	67	Chordata	Actinopterygii	Syngnathiformes	Fistulariidae	Fistularia commersonii	1	coronette fish	NA
Sub	Sub_2440	2440	2016-03-20	10.2832	-109.22	0_250m	75	Chordata	Actinopterygii	Perciformes	Carangidae	Caranx sexfasciatus	1	bigeye jack	NA
Sub	Sub_2440	2440	2016-03-20	10.2832	-109.22	0_250m	60	Chordata	Actinopterygii	Perciformes	Serranidae	Epinephelus labriformis	2	flag cabrilla	NA
Sub	Sub_2440	2440	2016-03-20	10.2832	-109.22	0_250m	100	Chordata	Actinopterygii	Perciformes	Pomacentridae	Chromis spp	2	damselfish	NA
Sub	Sub_2440	2440	2016-03-20	10.2832	-109.22	0_250m	67	Chordata	Actinopterygii	Tetraodontiformes	Diodontidae	Diodon holocanthus	2	pufferfish	NA
Sub	Sub_2440	2440	2016-03-20	10.2832	-109.22	0_250m	65	Chordata	Actinopterygii	Tetraodontiformes	Balistidae	Sufflamen verres	2	trigger	NA
Sub	Sub_2440	2440	2016-03-20	10.2832	-109.22	0_250m	60	Chordata	Actinopterygii	Perciformes	Kyphosidae	Kyphosus spp	1	chopa	NA
Sub	Sub_2440	2440	2016-03-20	10.2832	-109.22	0_250m	100	Chordata	Chondrichthyes	Carcharhiniformes	Sphyrnidae	Sphyrna lewini	12	hammerhead	NA
Sub	Sub_2440	2440	2016-03-20	10.2832	-109.22	0_250m	160	Porifera	Porifera	Porifera	NA	NA	1	sponge	NA
Sub	Sub_2440	2440	2016-03-20	10.2832	-109.22	0_250m	150	Chordata	Actinopterygii	Perciformes	Epinephelidae	Epinephelus cifuentesi	5	olive grouper	NA
Sub	Sub_2440	2440	2016-03-20	10.2832	-109.22	0_250m	60	Chordata	Actinopterygii	Perciformes	Labridae	Thalassoma robertsoni	1	wrasse	NA
Sub	Sub_2440	2440	2016-03-20	10.2832	-109.22	0_250m	60	Chordata	Actinopterygii	Perciformes	Lutjanidae	Lutjanus viridis	1	blueyellow snapper	NA
Sub	Sub_2440	2440	2016-03-20	10.2832	-109.22	0_250m	60	Chordata	Actinopterygii	Anguilliformes	Muraenidae	Gymnothorax dovii	3	moray eel	NA
Sub	Sub_2440	2440	2016-03-20	10.2832	-109.22	0_250m	160	Cnidaria	Anthozoa	Scleractinia	Caryophylliidae	Caryophyllia spp	1	hard coral	NA
Sub	Sub_2440	2440	2016-03-20	10.2832	-109.22	0_250m	60	Chordata	Actinopterygii	Perciformes	Zanclidae	NA	3	zanclid	NA
Sub	Sub_2440	2440	2016-03-20	10.2832	-109.22	0_250m	57	Cnidaria	Anthozoa	Scleractinia	NA	NA	10	coral	NA
Sub	Sub_2440	2440	2016-03-20	10.2832	-109.22	0_250m	160	Chordata	Actinopterygii	Scorpaeniformes	Scorpaenidae	Pontinus vaughani	1	scorpion fish	NA
Sub	Sub_2440	2440	2016-03-20	10.2832	-109.22	0_250m	100	Chordata	Actinopterygii	Perciformes	Epinephelidae	Dermatolepis dermatolepis	3	leather bass	NA
Sub	Sub_2440	2440	2016-03-20	10.2832	-109.22	0_250m	67	Echinodermata	Echinoidea	Diadematoida	Diadematidae	Echinothrix diadema	1	urchin	NA
Sub	Sub_2440	2440	2016-03-20	10.2832	-109.22	0_250m	67	Echinodermata	Echinoidea	Echinoidea	NA	NA	1	sea urchins	NA
Sub	Sub_2440	2440	2016-03-20	10.2832	-109.22	0_250m	67	Chordata	Actinopterygii	Perciformes	Epinephelidae	Epinephelus sp	2	grouper	NA
Sub	Sub_2440	2440	2016-03-20	10.2832	-109.22	0_250m	160	Cnidaria	Hydrozoa	Hydrozoa	NA	NA	1	hydrozoan	NA
Sub	Sub_2440	2440	2016-03-20	10.2832	-109.22	0_250m	100	Chordata	Actinopterygii	Perciformes	Serranidae	Paranthias colonus	67	creole fish	NA
Sub	Sub_2440	2440	2016-03-20	10.2832	-109.22	0_250m	60	Chordata	Actinopterygii	Perciformes	Chaetodontidae	Forcipiger flavissimus	1	long nose butterfly	NA
Sub	Sub_2440	2440	2016-03-20	10.2832	-109.22	0_250m	93	Chordata	Actinopterygii	Perciformes	Epinephelidae	Epinephelus clippertonensis	1	clipperton grouper	NA
Sub	Sub_2440	2440	2016-03-20	10.2832	-109.22	0_250m	67	Rhodophyta	Florideophyceae	Corallinales	NA	NA	100	crustose coralline algae	NA
Sub	Sub_2440	2440	2016-03-20	10.2832	-109.22	0_250m	60	Chordata	Actinopterygii	Perciformes	Acanthuridae	NA	1	loose spot surgeon fish	NA
Sub	Sub_2440	2440	2016-03-20	10.2832	-109.22	0_250m	145	Chordata	Actinopterygii	Perciformes	Carangidae	Caranx lugubris	2	blackjack	NA
Sub	Sub_2440	2440	2016-03-20	10.2832	-109.22	0_250m	120	Chordata	Actinopterygii	Perciformes	Scombridae	NA	2	tuna	NA
Sub	Sub_2440	2440	2016-03-20	10.2832	-109.22	0_250m	80	Chordata	Actinopterygii	Perciformes	Mullidae	Mulloidichthys dentatus	12	mexican goatfish	NA
Sub	Sub_2440	2440	2016-03-20	10.2832	-109.22	0_250m	67	Chordata	Actinopterygii	Tetraodontiformes	Tetraodontidae	Arothron meleagris	1	guineafowl puffer	NA
Sub	Sub_2440	2440	2016-03-20	10.2832	-109.22	0_250m	100	Chordata	Actinopterygii	Perciformes	Pomacanthidae	Holacanthus limbaughi	3	clipperton angel fish	NA
Sub	Sub_2440	2440	2016-03-20	10.2832	-109.22	0_250m	114	Chordata	Actinopterygii	Perciformes	Chaetodontidae	Johnrandallia nigrirostris	1	butterflyfish	NA
Sub	Sub_2441	2441	2016-03-20	10.2858	-109.227	0_250m	230	Cnidaria	Anthozoa	Alcyonacea	Acanthogorgiidae	NA	4	gorgonians	NA
Sub	Sub_2441	2441	2016-03-20	10.2858	-109.227	251_500m	275	Porifera	Porifera	Porifera	NA	NA	1	sponge	NA
Sub	Sub_2441	2441	2016-03-20	10.2858	-109.227	0_250m	125	Chordata	Chondrichthyes	Carcharhiniformes	Carcharhinidae	Carcharhinus falciformis	1	silky shark	NA
Sub	Sub_2441	2441	2016-03-20	10.2858	-109.227	251_500m	295	Echinodermata	Ophiuroidea	Ophiurida	Amphiuridae	Ophiothrix galapagensis	50	brittlestar	NA
Sub	Sub_2441	2441	2016-03-20	10.2858	-109.227	0_250m	120	Cnidaria	Cnidaria	Cnidaria	NA	NA	1	jellyfish	NA
Sub	Sub_2441	2441	2016-03-20	10.2858	-109.227	0_250m	250	Bryozoa	Bryozoa	Bryozoa	NA	NA	1	bryozoan	NA
Sub	Sub_2441	2441	2016-03-20	10.2858	-109.227	251_500m	299	Chordata	Actinopterygii	Scorpaeniformes	Scorpaenidae	Pontinus vaughani	1	scorpion fish	NA
Sub	Sub_2441	2441	2016-03-20	10.2858	-109.227	0_250m	71	Chordata	Actinopterygii	Perciformes	Carangidae	Elagatis bipinnulata	1	rainbow runner	NA
Sub	Sub_2442	2442	2016-03-21	10.2858	-109.226	0_250m	129	Chordata	Actinopterygii	Perciformes	Chaetodontidae	Prognathodes falcifer	9	butterfly fish	NA
Sub	Sub_2442	2442	2016-03-21	10.2858	-109.226	0_250m	85	Chordata	Actinopterygii	Perciformes	Carangidae	Caranx sexfasciatus	1	bigeye jack	NA
Sub	Sub_2442	2442	2016-03-21	10.2858	-109.226	0_250m	72	Chordata	Actinopterygii	Perciformes	Zanclidae	Zanclus cornutus	2	moorish idol	NA
Sub	Sub_2442	2442	2016-03-21	10.2858	-109.226	0_250m	100	Chordata	Chondrichthyes	Carcharhiniformes	Carcharhinidae	Carcharhinus galapagensis	2	galapagos shark	NA
Sub	Sub_2442	2442	2016-03-21	10.2858	-109.226	0_250m	25	Chordata	Actinopterygii	Perciformes	Carangidae	Elagatis bipinnulata	1	rainbow runner	NA
Sub	Sub_2442	2442	2016-03-21	10.2858	-109.226	0_250m	85	Chordata	Actinopterygii	Perciformes	Serranidae	Paranthias colonus	153	creole fish	NA
Sub	Sub_2442	2442	2016-03-21	10.2858	-109.226	251_500m	302	Chordata	Actinopterygii	Scorpaeniformes	Scorpaenidae	Pontinus vaughani	23	scorpion fish	NA
Sub	Sub_2442	2442	2016-03-21	10.2858	-109.226	0_250m	50	Chordata	Actinopterygii	Tetraodontiformes	Balistidae	Melichthys niger	1	black trigger	NA
Sub	Sub_2442	2442	2016-03-21	10.2858	-109.226	0_250m	72	Chordata	Actinopterygii	Perciformes	Pomacentridae	Stegastes spp	1	damselfish	NA
Sub	Sub_2442	2442	2016-03-21	10.2858	-109.226	0_250m	245	Annelida	Polychaeta	Polychaeta	NA	NA	1	polychaeta	NA
Sub	Sub_2442	2442	2016-03-21	10.2858	-109.226	0_250m	245	Porifera	Porifera	Porifera	NA	NA	1	sponge	NA
Sub	Sub_2442	2442	2016-03-21	10.2858	-109.226	0_250m	50	Chordata	Actinopterygii	Perciformes	Carangidae	Caranx melampygus	1	bluefin trevally	NA
Sub	Sub_2442	2442	2016-03-21	10.2858	-109.226	0_250m	85	Chordata	Chondrichthyes	Carcharhiniformes	Carcharhinidae	Carcharhinus albimarginatus	1	silvertip shark	NA
Sub	Sub_2442	2442	2016-03-21	10.2858	-109.226	0_250m	129	Chordata	Actinopterygii	Perciformes	Carangidae	Caranx lugubris	1	blackjack	NA
Sub	Sub_2442	2442	2016-03-21	10.2858	-109.226	0_250m	150	Chordata	Actinopterygii	Perciformes	Pomacanthidae	Holacanthus limbaughi	1	clipperton angel fish	NA
Sub	Sub_2442	2442	2016-03-21	10.2858	-109.226	251_500m	307	Echinodermata	Ophiuroidea	Ophiurida	Amphiuridae	Ophiothrix galapagensis	300	brittlestar	NA
Sub	Sub_2442	2442	2016-03-21	10.2858	-109.226	0_250m	72	Cnidaria	Anthozoa	Antipatharia	Antipathidae	Antipathes galapagensis	1	black coral	NA
Sub	Sub_2442	2442	2016-03-21	10.2858	-109.226	0_250m	72	Rhodophyta	Florideophyceae	Corallinales	NA	NA	1	crustose coralline algae	NA
Sub	Sub_2442	2442	2016-03-21	10.2858	-109.226	0_250m	58	Cnidaria	Anthozoa	Scleractinia	Agariciidae	Pavona varians	1	coral	NA
Sub	Sub_2442	2442	2016-03-21	10.2858	-109.226	251_500m	295	Cnidaria	Anthozoa	Alcyonacea	Acanthogorgiidae	Acanthogorgia sp	12	gorgonians	NA
Sub	Sub_2442	2442	2016-03-21	10.2858	-109.226	0_250m	85	Chordata	Actinopterygii	Anguilliformes	Muraenidae	Gymnothorax dovii	2	moray eel	NA
Sub	Sub_2442	2442	2016-03-21	10.2858	-109.226	0_250m	85	Chordata	Actinopterygii	Perciformes	Epinephelidae	Dermatolepis dermatolepis	1	leather bass	NA
Sub	Sub_2442	2442	2016-03-21	10.2858	-109.226	0_250m	58	Cnidaria	Anthozoa	Scleractinia	Agariciidae	Leptoseris incrustans	2	coral	NA
Sub	Sub_2442	2442	2016-03-21	10.2858	-109.226	0_250m	137	Chordata	Chondrichthyes	Chondrichthyes	Chondrichthyes	Chondrichthyes	1	shark	NA
Sub	Sub_2442	2442	2016-03-21	10.2858	-109.226	0_250m	58	Cnidaria	Anthozoa	Antipatharia	NA	NA	1	coral	NA
Sub	Sub_2442	2442	2016-03-21	10.2858	-109.226	0_250m	85	Echinodermata	Echinoidea	Diadematoida	Diadematidae	Echinothrix diadema	1	urchin	NA
Sub	Sub_2442	2442	2016-03-21	10.2858	-109.226	0_250m	129	Chordata	Actinopterygii	Beryciformes	Holocentridae	Myripristis spp	1	soldierfish	NA
Sub	Sub_2442	2442	2016-03-21	10.2858	-109.226	0_250m	72	Chordata	Actinopterygii	Perciformes	Acanthuridae	Acanthurus nigricans	1	white cheek surgeonfish	NA
Sub	Sub_2442	2442	2016-03-21	10.2858	-109.226	251_500m	307	Arthropoda	Malacostraca	Decapoda	Calappidae	Platymera gaudichaudii	1	crab	NA
Sub	Sub_2442	2442	2016-03-21	10.2858	-109.226	0_250m	129	Chordata	Actinopterygii	Perciformes	Epinephelidae	Epinephelus clippertonensis	1	clipperton grouper	NA
Sub	Sub_2442	2442	2016-03-21	10.2858	-109.226	251_500m	310	Cnidaria	Hydrozoa	Siphonophorae	NA	NA	1	siphonophora	NA
Sub	Sub_2442	2442	2016-03-21	10.2858	-109.226	0_250m	150	Chordata	Chondrichthyes	Carcharhiniformes	Sphyrnidae	Sphyrna lewini	48	hammerhead	NA
Sub	Sub_2442	2442	2016-03-21	10.2858	-109.226	0_250m	72	Chordata	Actinopterygii	Perciformes	Labridae	Bodianus diplotaenia	3	mexican hogfish	NA
Sub	Sub_2443	2443	2016-03-21	10.2874	-109.228	251_500m	290	Arthropoda	Malacostraca	Decapoda	Epialtidae	Stenocionops sp	2	crab	NA
Sub	Sub_2443	2443	2016-03-21	10.2874	-109.228	0_250m	80	Chordata	Actinopterygii	Perciformes	Scombridae	Thunnus albacares	1	yellowfin tuna	NA
Sub	Sub_2443	2443	2016-03-21	10.2874	-109.228	251_500m	292	Porifera	Porifera	Porifera	NA	NA	2	sponge	NA
Sub	Sub_2443	2443	2016-03-21	10.2874	-109.228	251_500m	302	Cnidaria	Anthozoa	Scleractinia	NA	NA	1	coral	NA
Sub	Sub_2443	2443	2016-03-21	10.2874	-109.228	251_500m	290	Arthropoda	Malacostraca	Decapoda	Calappidae	NA	1	crab	NA
Sub	Sub_2443	2443	2016-03-21	10.2874	-109.228	251_500m	302	Echinodermata	Ophiuroidea	Ophiurida	Amphiuridae	Ophiothrix galapagensis	10	brittlestar	NA
Sub	Sub_2443	2443	2016-03-21	10.2874	-109.228	0_250m	65	Chordata	Actinopterygii	Perciformes	Carangidae	Elagatis bipinnulata	1	rainbow runner	NA
Sub	Sub_2443	2443	2016-03-21	10.2874	-109.228	251_500m	255	Cnidaria	Anthozoa	Alcyonacea	Gorgoniidae	Leptogorgia styx	10	gorgonians	NA
Sub	Sub_2443	2443	2016-03-21	10.2874	-109.228	0_250m	33	Chordata	Chondrichthyes	Carcharhiniformes	Carcharhinidae	Carcharhinus falciformis	1	silky shark	NA
Sub	Sub_2443	2443	2016-03-21	10.2874	-109.228	0_250m	61	Chordata	Actinopterygii	Perciformes	Blenniidae	NA	1	blenny	NA
Sub	Sub_2443	2443	2016-03-21	10.2874	-109.228	251_500m	292	Arthropoda	Malacostraca	Decapoda	NA	NA	2	spidercrab	NA
Sub	Sub_2443	2443	2016-03-21	10.2874	-109.228	251_500m	298	Cnidaria	Hydrozoa	Siphonophorae	NA	NA	1	siphonophora	NA
Sub	Sub_2443	2443	2016-03-21	10.2874	-109.228	0_250m	145	Chordata	Chondrichthyes	Myliobatiformes	Myliobatidae	NA	1	mobula	NA
Sub	Sub_2443	2443	2016-03-21	10.2874	-109.228	0_250m	120	Chordata	Chondrichthyes	Carcharhiniformes	Carcharhinidae	Carcharhinus falciformis	5	silky shark	NA
Sub	Sub_2443	2443	2016-03-21	10.2874	-109.228	251_500m	298	Mollusca	Cephalopoda	Octopoda	NA	NA	1	octopus	NA
Sub	Sub_2443	2443	2016-03-21	10.2874	-109.228	251_500m	297	Chordata	Actinopterygii	Scorpaeniformes	Scorpaenidae	NA	1	scorpion fish	NA
Sub	Sub_2443	2443	2016-03-21	10.2874	-109.228	251_500m	297	Cnidaria	Anthozoa	Alcyonacea	Acanthogorgiidae	NA	1	gorgonians	NA
Sub	Sub_2443	2443	2016-03-21	10.2874	-109.228	251_500m	302	Cnidaria	Anthozoa	Alcyonacea	Acanthogorgiidae	Acanthogorgia sp	4	gorgonians	NA
UVC	UVC_Site_1		2016-03-13	10.2923	-109.227	0_250m	10	Chordata	Actinopterygii	Tetraodontiformes	Tetraodontidae	Arothron meleagris	0.00333333	Golden puffer	NA
UVC	UVC_Site_1		2016-03-13	10.2923	-109.227	0_250m	20	Chordata	Actinopterygii	Perciformes	Kyphosidae	Kyphosus elegans	0.00666667	Cortez sea chub	NA
UVC	UVC_Site_1		2016-03-13	10.2923	-109.227	0_250m	20	Chordata	Actinopterygii	Perciformes	Chaetodontidae	Johnrandallia nigrirostris	0.04	Blacknosed butterflyfish	NA
UVC	UVC_Site_1		2016-03-13	10.2923	-109.227	0_250m	10	Chordata	Actinopterygii	Perciformes	Zanclidae	Zanclus cornutus	0.0266667	Moorish idol	NA
UVC	UVC_Site_1		2016-03-13	10.2923	-109.227	0_250m	10	Cnidaria	Anthozoa	Scleractinia	Agariciidae	Pavona explanulata	1	stary pavonaa	0.4
UVC	UVC_Site_1		2016-03-13	10.2923	-109.227	0_250m	20	Chordata	Actinopterygii	Tetraodontiformes	Tetraodontidae	Arothron meleagris	0.0566667	Golden puffer	NA
UVC	UVC_Site_1		2016-03-13	10.2923	-109.227	0_250m	20	Chordata	Actinopterygii	Perciformes	Zanclidae	Zanclus cornutus	0.0466667	Moorish idol	NA
UVC	UVC_Site_1		2016-03-13	10.2923	-109.227	0_250m	20	Chordata	Actinopterygii	Perciformes	Serranidae	Epinephelus labriformis	0.0966667	Starry grouper	NA
UVC	UVC_Site_1		2016-03-13	10.2923	-109.227	0_250m	10	Cnidaria	Anthozoa	Scleractinia	Agariciidae	Pavona varians	7	false brain coral	2.8
UVC	UVC_Site_1		2016-03-13	10.2923	-109.227	0_250m	10	Chordata	Actinopterygii	Perciformes	Labridae	Stethojulis bandanensis	0.0133333	Red shoulder wrasse	NA
UVC	UVC_Site_1		2016-03-13	10.2923	-109.227	0_250m	20	Cnidaria	Anthozoa	Scleractinia	Pocilloporidae	Pocillopora effusus	1	stony cauliflour coral	0.4
UVC	UVC_Site_1		2016-03-13	10.2923	-109.227	0_250m	20	Chordata	Actinopterygii	Perciformes	Labridae	Thalassoma grammaticum	0.06	Sunset wrasse	NA
UVC	UVC_Site_1		2016-03-13	10.2923	-109.227	0_250m	10	Chordata	Actinopterygii	Perciformes	Scaridae	Scarus rubroviolaceus	0.00666667	Redlip parrotfish	NA
UVC	UVC_Site_1		2016-03-13	10.2923	-109.227	0_250m	10	Chordata	Actinopterygii	Perciformes	Carangidae	Caranx melampygus	0.0266667	Bluefin trevally	NA
UVC	UVC_Site_1		2016-03-13	10.2923	-109.227	0_250m	10	Chordata	Actinopterygii	Perciformes	Blenniidae	Ophioblennius steindachneri	0.0133333	Large banded blenny	NA
UVC	UVC_Site_1		2016-03-13	10.2923	-109.227	0_250m	20	Cnidaria	Anthozoa	Scleractinia	Agariciidae	Pavona varians	29	false brain coral	11.6
UVC	UVC_Site_1		2016-03-13	10.2923	-109.227	0_250m	20	Chordata	Actinopterygii	Perciformes	Serranidae	Epinephelus clippertonensis	0.00333333	Clipperton grouper	NA
UVC	UVC_Site_1		2016-03-13	10.2923	-109.227	0_250m	20	Chordata	Actinopterygii	Perciformes	Carangidae	Caranx lugubris	0.0166667	Black jack	NA
UVC	UVC_Site_1		2016-03-13	10.2923	-109.227	0_250m	10	Chordata	Actinopterygii	Perciformes	Cirrhitidae	Cirrhitichthys oxycephalus	0.0133333	Coral hawkfish	NA
UVC	UVC_Site_1		2016-03-13	10.2923	-109.227	0_250m	10	Chordata	Actinopterygii	Tetraodontiformes	Balistidae	Sufflamen verres	0.00333333	Orangside triggerfish	NA
UVC	UVC_Site_1		2016-03-13	10.2923	-109.227	0_250m	10	Chordata	Actinopterygii	Perciformes	Balistidae	Melichthys niger	0.02	Black triggerfish	NA
UVC	UVC_Site_1		2016-03-13	10.2923	-109.227	0_250m	10	Cnidaria	Anthozoa	Scleractinia	Pocilloporidae	Pocillopora effusus	2	stony cauliflour coral	0.8
UVC	UVC_Site_1		2016-03-13	10.2923	-109.227	0_250m	20	Chordata	Actinopterygii	Tetraodontiformes	Balistidae	Sufflamen verres	0.01	Orangside triggerfish	NA
UVC	UVC_Site_1		2016-03-13	10.2923	-109.227	0_250m	20	Cnidaria	Anthozoa	Scleractinia	Agariciidae	Pavona maldivensis	1	maldives coral	0.4
UVC	UVC_Site_1		2016-03-13	10.2923	-109.227	0_250m	10	Chordata	Actinopterygii	Perciformes	Carangidae	Caranx lugubris	0.00666667	Black jack	NA
UVC	UVC_Site_1		2016-03-13	10.2923	-109.227	0_250m	20	Chordata	Actinopterygii	Perciformes	Kyphosidae	Kyphosus analogus	0.0133333	Blue-bronze sea chub	NA
UVC	UVC_Site_1		2016-03-13	10.2923	-109.227	0_250m	10	Chordata	Actinopterygii	Beryciformes	Holocentridae	Myripristis berndti	0.00666667	Blotcheye soldierfish	NA
UVC	UVC_Site_1		2016-03-13	10.2923	-109.227	0_250m	10	Chordata	Actinopterygii	Perciformes	Kyphosidae	Kyphosus elegans	0.00333333	Cortez sea chub	NA
UVC	UVC_Site_1		2016-03-13	10.2923	-109.227	0_250m	10	Chordata	Actinopterygii	Perciformes	Serranidae	Epinephelus labriformis	0.0133333	Starry grouper	NA
UVC	UVC_Site_1		2016-03-13	10.2923	-109.227	0_250m	10	Chordata	Actinopterygii	Perciformes	Chaetodontidae	Johnrandallia nigrirostris	0.0133333	Blacknosed butterflyfish	NA
UVC	UVC_Site_1		2016-03-13	10.2923	-109.227	0_250m	20	Chordata	Actinopterygii	Perciformes	Balistidae	Melichthys niger	0.36	Black triggerfish	NA
UVC	UVC_Site_1		2016-03-13	10.2923	-109.227	0_250m	20	Chordata	Actinopterygii	Anguilliformes	Muraenidae	Gymnothorax dovii	0.00666667	Speckled moray	NA
UVC	UVC_Site_1		2016-03-13	10.2923	-109.227	0_250m	20	Cnidaria	Anthozoa	Scleractinia	Agariciidae	Leptoseris scabra	1	rough coral	0.4
UVC	UVC_Site_1		2016-03-13	10.2923	-109.227	0_250m	20	Chordata	Actinopterygii	Perciformes	Acanthuridae	Ctenochaetus marginatus	0.0666667	Stripedfin surgeonfish	NA
UVC	UVC_Site_1		2016-03-13	10.2923	-109.227	0_250m	20	Cnidaria	Anthozoa	Scleractinia	Agariciidae	Leptoseris incrustans	4	crust coral	1.6
UVC	UVC_Site_1		2016-03-13	10.2923	-109.227	0_250m	10	Cnidaria	Anthozoa	Scleractinia	Poritidae	Porites lutea	2	hump coral	0.8
UVC	UVC_Site_1		2016-03-13	10.2923	-109.227	0_250m	20	Cnidaria	Anthozoa	Scleractinia	Poritidae	Porites lutea	11	hump coral	4.4
UVC	UVC_Site_1		2016-03-13	10.2923	-109.227	0_250m	10	Cnidaria	Anthozoa	Scleractinia	Poritidae	Porites arnaudi	5	Porites arnaudi	2
UVC	UVC_Site_1		2016-03-13	10.2923	-109.227	0_250m	20	Cnidaria	Anthozoa	Scleractinia	Poritidae	Porites arnaudi	55	Porites arnaudi	22
UVC	UVC_Site_1		2016-03-13	10.2923	-109.227	0_250m	20	Chordata	Actinopterygii	Beryciformes	Holocentridae	Myripristis berndti	0.0133333	Blotcheye soldierfish	NA
UVC	UVC_Site_1		2016-03-13	10.2923	-109.227	0_250m	20	Chordata	Actinopterygii	Perciformes	Serranidae	Dermatolepis dermatolepis	0.01	Leather bass	NA
UVC	UVC_Site_1		2016-03-13	10.2923	-109.227	0_250m	10	Cnidaria	Anthozoa	Scleractinia	Agariciidae	Pavona clavus	10	swollen coral	4
UVC	UVC_Site_1		2016-03-13	10.2923	-109.227	0_250m	20	Chordata	Actinopterygii	Perciformes	Pomacentridae	Stegastes beebei	0.113333	Galapagos ringtail damselfish	NA
UVC	UVC_Site_1		2016-03-13	10.2923	-109.227	0_250m	10	Chordata	Actinopterygii	Perciformes	Labridae	Bodianus diplotaenia	0.00333333	Mexican hogfish	NA
UVC	UVC_Site_1		2016-03-13	10.2923	-109.227	0_250m	10	Chordata	Actinopterygii	Perciformes	Acanthuridae	Acanthurus nigricans	0.243333	White cheek surgeonfish	NA
UVC	UVC_Site_1		2016-03-13	10.2923	-109.227	0_250m	20	Chordata	Actinopterygii	Perciformes	Acanthuridae	Acanthurus nigricans	0.206667	White cheek surgeonfish	NA
UVC	UVC_Site_1		2016-03-13	10.2923	-109.227	0_250m	10	Chordata	Actinopterygii	Perciformes	Pomacentridae	Stegastes beebei	0.433333	Galapagos ringtail damselfish	NA
UVC	UVC_Site_1		2016-03-13	10.2923	-109.227	0_250m	10	Cnidaria	Anthozoa	Scleractinia	Poritidae	Porites lobata	3	lobe coral	1.2
UVC	UVC_Site_1		2016-03-13	10.2923	-109.227	0_250m	20	Cnidaria	Anthozoa	Scleractinia	Poritidae	Porites lobata	56	lobe coral	22.4
UVC	UVC_Site_1		2016-03-13	10.2923	-109.227	0_250m	10	Chordata	Actinopterygii	Perciformes	Serranidae	Dermatolepis dermatolepis	0.0133333	Leather bass	NA
UVC	UVC_Site_1		2016-03-13	10.2923	-109.227	0_250m	20	Chordata	Actinopterygii	Perciformes	Chaetodontidae	Forcipiger flavissimus	0.02	Yellow longnose butterfly	NA
UVC	UVC_Site_1		2016-03-13	10.2923	-109.227	0_250m	20	Chordata	Actinopterygii	Syngnathiformes	Aulostomidae	Aulostomus chinensis	0.00333333	Chinese trumpetfish	NA
UVC	UVC_Site_1		2016-03-13	10.2923	-109.227	0_250m	10	Chordata	Actinopterygii	Perciformes	Labridae	Thalassoma virens	0.00333333	Emerald wrasse	NA
UVC	UVC_Site_1		2016-03-13	10.2923	-109.227	0_250m	10	Chordata	Actinopterygii	Perciformes	Carangidae	Elagatis bipinnulata	0.00333333	Rainbow runner	NA
UVC	UVC_Site_1		2016-03-13	10.2923	-109.227	0_250m	10	Chordata	Actinopterygii	Perciformes	Cirrhitidae	Cirrhitus rivulatus	0.00333333	Giant hawkfish	NA
UVC	UVC_Site_1		2016-03-13	10.2923	-109.227	0_250m	20	Chordata	Actinopterygii	Perciformes	Carangidae	Elagatis bipinnulata	0.00333333	Rainbow runner	NA
UVC	UVC_Site_1		2016-03-13	10.2923	-109.227	0_250m	20	Chordata	Actinopterygii	Perciformes	Scaridae	Scarus rubroviolaceus	0.02	Redlip parrotfish	NA
UVC	UVC_Site_1		2016-03-13	10.2923	-109.227	0_250m	20	Chordata	Actinopterygii	Perciformes	Carangidae	Caranx melampygus	0.0466667	Bluefin trevally	NA
UVC	UVC_Site_1		2016-03-13	10.2923	-109.227	0_250m	10	Chordata	Actinopterygii	Perciformes	Acanthuridae	Ctenochaetus marginatus	0.106667	Stripedfin surgeonfish	NA
UVC	UVC_Site_1		2016-03-13	10.2923	-109.227	0_250m	10	Chordata	Actinopterygii	Perciformes	Labridae	Thalassoma robertsoni	0.426667	Clipperton rainbow wrasse	NA
UVC	UVC_Site_1		2016-03-13	10.2923	-109.227	0_250m	20	Cnidaria	Anthozoa	Scleractinia	Pocilloporidae	Pocillopora meandrina	1	cauliflour coral	0.4
UVC	UVC_Site_1		2016-03-13	10.2923	-109.227	0_250m	10	Chordata	Actinopterygii	Perciformes	Acanthuridae	Acanthurus triostegus	0.00666667	Convict tang	NA
UVC	UVC_Site_1		2016-03-13	10.2923	-109.227	0_250m	10	Chordata	Actinopterygii	Perciformes	Pomacanthidae	Holacanthus clarionensis	0.00666667	Clarion angelfish	NA
UVC	UVC_Site_1		2016-03-13	10.2923	-109.227	0_250m	20	Chordata	Actinopterygii	Perciformes	Labridae	Thalassoma robertsoni	1.6	Clipperton rainbow wrasse	NA
UVC	UVC_Site_1		2016-03-13	10.2923	-109.227	0_250m	10	Chordata	Actinopterygii	Tetraodontiformes	Balistidae	Balistes polylepis	0.00333333	Finescale triggerfish	NA
UVC	UVC_Site_1		2016-03-13	10.2923	-109.227	0_250m	10	Chordata	Actinopterygii	Perciformes	Labridae	Thalassoma grammaticum	0.133333	Sunset wrasse	NA
UVC	UVC_Site_1		2016-03-13	10.2923	-109.227	0_250m	20	Chordata	Actinopterygii	Perciformes	Serranidae	Paranthias colonus	5.02667	Pacific creolefish	NA
UVC	UVC_Site_1		2016-03-13	10.2923	-109.227	0_250m	20	Chordata	Actinopterygii	Perciformes	Pomacanthidae	Holacanthus clarionensis	0.0666667	Clarion angelfish	NA
UVC	UVC_Site_1		2016-03-13	10.2923	-109.227	0_250m	10	Chordata	Actinopterygii	Perciformes	Serranidae	Paranthias colonus	2.29333	Pacific creolefish	NA
UVC	UVC_Site_1		2016-03-13	10.2923	-109.227	0_250m	20	Cnidaria	Anthozoa	Scleractinia	Agariciidae	Pavona clavus	15	swollen coral	6
UVC	UVC_Site_10		2016-03-17	10.3121	-109.203	0_250m	10	Chordata	Actinopterygii	Perciformes	Scaridae	Scarus rubroviolaceus	0.0166667	Redlip parrotfish	NA
UVC	UVC_Site_10		2016-03-17	10.3121	-109.203	0_250m	10	Chordata	Actinopterygii	Anguilliformes	Muraenidae	Gymnothorax dovii	0.00666667	Speckled moray	NA
UVC	UVC_Site_10		2016-03-17	10.3121	-109.203	0_250m	20	Chordata	Actinopterygii	Perciformes	Scaridae	Scarus rubroviolaceus	0.00666667	Redlip parrotfish	NA
UVC	UVC_Site_10		2016-03-17	10.3121	-109.203	0_250m	10	Cnidaria	Anthozoa	Scleractinia	Pocilloporidae	Pocillopora meandrina	1	cauliflour coral	0.4
UVC	UVC_Site_10		2016-03-17	10.3121	-109.203	0_250m	10	Cnidaria	Anthozoa	Scleractinia	Poritidae	Porites lobata	83	lobe coral	33.2
UVC	UVC_Site_10		2016-03-17	10.3121	-109.203	0_250m	10	Chordata	Actinopterygii	Perciformes	Pomacentridae	Stegastes beebei	1.65333	Galapagos ringtail damselfish	NA
UVC	UVC_Site_10		2016-03-17	10.3121	-109.203	0_250m	20	Chordata	Actinopterygii	Perciformes	Pomacentridae	Stegastes beebei	0.06	Galapagos ringtail damselfish	NA
UVC	UVC_Site_10		2016-03-17	10.3121	-109.203	0_250m	20	Cnidaria	Anthozoa	Scleractinia	Poritidae	Porites arnaudi	34	Porites arnaudi	13.6
UVC	UVC_Site_10		2016-03-17	10.3121	-109.203	0_250m	10	Cnidaria	Anthozoa	Scleractinia	Poritidae	Porites arnaudi	1	Porites arnaudi	0.4
UVC	UVC_Site_10		2016-03-17	10.3121	-109.203	0_250m	10	Chordata	Actinopterygii	Perciformes	Serranidae	Paranthias colonus	0.466667	Pacific creolefish	NA
UVC	UVC_Site_10		2016-03-17	10.3121	-109.203	0_250m	20	Chordata	Actinopterygii	Perciformes	Serranidae	Paranthias colonus	4.51	Pacific creolefish	NA
UVC	UVC_Site_10		2016-03-17	10.3121	-109.203	0_250m	20	Chordata	Actinopterygii	Perciformes	Chaetodontidae	Forcipiger flavissimus	0.0133333	Yellow longnose butterfly	NA
UVC	UVC_Site_10		2016-03-17	10.3121	-109.203	0_250m	20	Chordata	Actinopterygii	Perciformes	Serranidae	Epinephelus labriformis	0.0233333	Starry grouper	NA
UVC	UVC_Site_10		2016-03-17	10.3121	-109.203	0_250m	20	Chordata	Actinopterygii	Perciformes	Labridae	Thalassoma robertsoni	1.69333	Clipperton rainbow wrasse	NA
UVC	UVC_Site_10		2016-03-17	10.3121	-109.203	0_250m	10	Cnidaria	Anthozoa	Scleractinia	Pocilloporidae	Pocillopora effusus	19	stony cauliflour coral	7.6
UVC	UVC_Site_10		2016-03-17	10.3121	-109.203	0_250m	20	Chordata	Actinopterygii	Perciformes	Zanclidae	Zanclus cornutus	0.02	Moorish idol	NA
UVC	UVC_Site_10		2016-03-17	10.3121	-109.203	0_250m	10	Chordata	Actinopterygii	Perciformes	Serranidae	Epinephelus labriformis	0.0166667	Starry grouper	NA
UVC	UVC_Site_10		2016-03-17	10.3121	-109.203	0_250m	10	Chordata	Actinopterygii	Perciformes	Cirrhitidae	Cirrhitichthys oxycephalus	0.273333	Coral hawkfish	NA
UVC	UVC_Site_10		2016-03-17	10.3121	-109.203	0_250m	20	Chordata	Actinopterygii	Perciformes	Carangidae	Caranx melampygus	0.01	Bluefin trevally	NA
UVC	UVC_Site_10		2016-03-17	10.3121	-109.203	0_250m	10	Chordata	Actinopterygii	Perciformes	Carangidae	Caranx melampygus	0.0166667	Bluefin trevally	NA
UVC	UVC_Site_10		2016-03-17	10.3121	-109.203	0_250m	20	Cnidaria	Anthozoa	Scleractinia	Poritidae	Porites lobata	76	lobe coral	30.4
UVC	UVC_Site_10		2016-03-17	10.3121	-109.203	0_250m	20	Chordata	Actinopterygii	Perciformes	Cirrhitidae	Cirrhitichthys oxycephalus	0.0466667	Coral hawkfish	NA
UVC	UVC_Site_10		2016-03-17	10.3121	-109.203	0_250m	20	Chordata	Actinopterygii	Perciformes	Labridae	Thalassoma grammaticum	0.0333333	Sunset wrasse	NA
UVC	UVC_Site_10		2016-03-17	10.3121	-109.203	0_250m	10	Chordata	Actinopterygii	Perciformes	Labridae	Thalassoma grammaticum	0.14	Sunset wrasse	NA
UVC	UVC_Site_10		2016-03-17	10.3121	-109.203	0_250m	10	Chordata	Actinopterygii	Perciformes	Labridae	Thalassoma robertsoni	1.88	Clipperton rainbow wrasse	NA
UVC	UVC_Site_10		2016-03-17	10.3121	-109.203	0_250m	20	Chordata	Actinopterygii	Tetraodontiformes	Tetraodontidae	Canthigaster punctatissima	0.00666667	Spotted sharpmose puffer	NA
UVC	UVC_Site_10		2016-03-17	10.3121	-109.203	0_250m	20	Chordata	Actinopterygii	Perciformes	Lutjanidae	Lutjanus viridis	0.153333	Blue and gold snapper	NA
UVC	UVC_Site_10		2016-03-17	10.3121	-109.203	0_250m	20	Chordata	Actinopterygii	Perciformes	Labridae	Stethojulis bandanensis	0.00666667	Red shoulder wrasse	NA
UVC	UVC_Site_10		2016-03-17	10.3121	-109.203	0_250m	20	Cnidaria	Anthozoa	Scleractinia	Agariciidae	Pavona maldivensis	7	maldives coral	2.8
UVC	UVC_Site_10		2016-03-17	10.3121	-109.203	0_250m	10	Cnidaria	Anthozoa	Scleractinia	Agariciidae	Pavona gigantea	1	giant pavona	0.4
UVC	UVC_Site_10		2016-03-17	10.3121	-109.203	0_250m	10	Chordata	Actinopterygii	Tetraodontiformes	Tetraodontidae	Arothron meleagris	0.0133333	Golden puffer	NA
UVC	UVC_Site_10		2016-03-17	10.3121	-109.203	0_250m	20	Chordata	Actinopterygii	Tetraodontiformes	Tetraodontidae	Arothron meleagris	0.0333333	Golden puffer	NA
UVC	UVC_Site_10		2016-03-17	10.3121	-109.203	0_250m	20	Chordata	Actinopterygii	Beryciformes	Holocentridae	Myripristis berndti	0.216667	Blotcheye soldierfish	NA
UVC	UVC_Site_10		2016-03-17	10.3121	-109.203	0_250m	20	Chordata	Actinopterygii	Perciformes	Mullidae	Mulloidichthys dentatus	0.0466667	Mexican goatfish	NA
UVC	UVC_Site_10		2016-03-17	10.3121	-109.203	0_250m	20	Chordata	Actinopterygii	Perciformes	Acanthuridae	Ctenochaetus marginatus	0.226667	Stripedfin surgeonfish	NA
UVC	UVC_Site_10		2016-03-17	10.3121	-109.203	0_250m	10	Chordata	Actinopterygii	Perciformes	Balistidae	Melichthys niger	0.0266667	Black triggerfish	NA
UVC	UVC_Site_10		2016-03-17	10.3121	-109.203	0_250m	10	Chordata	Actinopterygii	Tetraodontiformes	Tetraodontidae	Canthigaster punctatissima	0.00666667	Spotted sharpmose puffer	NA
UVC	UVC_Site_10		2016-03-17	10.3121	-109.203	0_250m	20	Chordata	Actinopterygii	Perciformes	Chaetodontidae	Johnrandallia nigrirostris	0.14	Blacknosed butterflyfish	NA
UVC	UVC_Site_10		2016-03-17	10.3121	-109.203	0_250m	10	Cnidaria	Anthozoa	Scleractinia	Agariciidae	Pavona clavus	5	swollen coral	2
UVC	UVC_Site_10		2016-03-17	10.3121	-109.203	0_250m	20	Cnidaria	Anthozoa	Scleractinia	Agariciidae	Leptoseris incrustans	8	crust coral	3.2
UVC	UVC_Site_10		2016-03-17	10.3121	-109.203	0_250m	20	Chordata	Actinopterygii	Perciformes	Pomacanthidae	Holacanthus clarionensis	0.0133333	Clarion angelfish	NA
UVC	UVC_Site_10		2016-03-17	10.3121	-109.203	0_250m	10	Cnidaria	Anthozoa	Scleractinia	Poritidae	Porites lutea	14	hump coral	5.6
UVC	UVC_Site_10		2016-03-17	10.3121	-109.203	0_250m	20	Cnidaria	Anthozoa	Scleractinia	Poritidae	Porites lutea	8	hump coral	3.2
UVC	UVC_Site_10		2016-03-17	10.3121	-109.203	0_250m	20	Chordata	Actinopterygii	Perciformes	Serranidae	Dermatolepis dermatolepis	0.00333333	Leather bass	NA
UVC	UVC_Site_10		2016-03-17	10.3121	-109.203	0_250m	20	Chordata	Actinopterygii	Perciformes	Labridae	Bodianus diplotaenia	0.01	Mexican hogfish	NA
UVC	UVC_Site_10		2016-03-17	10.3121	-109.203	0_250m	10	Chordata	Actinopterygii	Perciformes	Acanthuridae	Acanthurus nigricans	0.246667	White cheek surgeonfish	NA
UVC	UVC_Site_10		2016-03-17	10.3121	-109.203	0_250m	20	Chordata	Actinopterygii	Perciformes	Acanthuridae	Acanthurus nigricans	0.416667	White cheek surgeonfish	NA
UVC	UVC_Site_10		2016-03-17	10.3121	-109.203	0_250m	10	Chordata	Actinopterygii	Perciformes	Acanthuridae	Ctenochaetus marginatus	0.0466667	Stripedfin surgeonfish	NA
UVC	UVC_Site_10		2016-03-17	10.3121	-109.203	0_250m	20	Chordata	Actinopterygii	Tetraodontiformes	Balistidae	Balistes polylepis	0.00333333	Finescale triggerfish	NA
UVC	UVC_Site_10		2016-03-17	10.3121	-109.203	0_250m	10	Cnidaria	Anthozoa	Scleractinia	Agariciidae	Pavona varians	4	false brain coral	1.6
UVC	UVC_Site_10		2016-03-17	10.3121	-109.203	0_250m	20	Cnidaria	Anthozoa	Scleractinia	Agariciidae	Pavona varians	28	false brain coral	11.2
UVC	UVC_Site_10		2016-03-17	10.3121	-109.203	0_250m	20	Chordata	Actinopterygii	Perciformes	Kyphosidae	Kyphosus elegans	0.00666667	Cortez sea chub	NA
UVC	UVC_Site_10		2016-03-17	10.3121	-109.203	0_250m	20	Chordata	Actinopterygii	Perciformes	Balistidae	Melichthys niger	0.02	Black triggerfish	NA
UVC	UVC_Site_10		2016-03-17	10.3121	-109.203	0_250m	20	Chordata	Actinopterygii	Tetraodontiformes	Balistidae	Sufflamen verres	0.0133333	Orangside triggerfish	NA
UVC	UVC_Site_10		2016-03-17	10.3121	-109.203	0_250m	10	Chordata	Actinopterygii	Tetraodontiformes	Balistidae	Sufflamen verres	0.02	Orangside triggerfish	NA
UVC	UVC_Site_11		2016-03-17	10.2993	-109.199	0_250m	20	Chordata	Actinopterygii	Perciformes	Acanthuridae	Ctenochaetus marginatus	0.103333	Stripedfin surgeonfish	NA
UVC	UVC_Site_11		2016-03-17	10.2993	-109.199	0_250m	20	Chordata	Actinopterygii	Perciformes	Carangidae	Elagatis bipinnulata	0.00666667	Rainbow runner	NA
UVC	UVC_Site_11		2016-03-17	10.2993	-109.199	0_250m	10	Chordata	Actinopterygii	Perciformes	Acanthuridae	Acanthurus triostegus	0.0666667	Convict tang	NA
UVC	UVC_Site_11		2016-03-17	10.2993	-109.199	0_250m	20	Chordata	Actinopterygii	Perciformes	Mullidae	Mulloidichthys dentatus	0.0133333	Mexican goatfish	NA
UVC	UVC_Site_11		2016-03-17	10.2993	-109.199	0_250m	20	Chordata	Actinopterygii	Perciformes	Chaetodontidae	Forcipiger flavissimus	0.00666667	Yellow longnose butterfly	NA
UVC	UVC_Site_11		2016-03-17	10.2993	-109.199	0_250m	10	Chordata	Actinopterygii	Perciformes	Serranidae	Epinephelus labriformis	0.0166667	Starry grouper	NA
UVC	UVC_Site_11		2016-03-17	10.2993	-109.199	0_250m	10	Chordata	Actinopterygii	Perciformes	Labridae	Thalassoma robertsoni	2.19333	Clipperton rainbow wrasse	NA
UVC	UVC_Site_11		2016-03-17	10.2993	-109.199	0_250m	10	Chordata	Actinopterygii	Perciformes	Acanthuridae	Ctenochaetus marginatus	0.0333333	Stripedfin surgeonfish	NA
UVC	UVC_Site_11		2016-03-17	10.2993	-109.199	0_250m	20	Chordata	Actinopterygii	Perciformes	Pomacentridae	Stegastes beebei	1.04	Galapagos ringtail damselfish	NA
UVC	UVC_Site_11		2016-03-17	10.2993	-109.199	0_250m	20	Chordata	Actinopterygii	Perciformes	Acanthuridae	Acanthurus nigricans	0.17	White cheek surgeonfish	NA
UVC	UVC_Site_11		2016-03-17	10.2993	-109.199	0_250m	20	Chordata	Actinopterygii	Perciformes	Serranidae	Dermatolepis dermatolepis	0.0166667	Leather bass	NA
UVC	UVC_Site_11		2016-03-17	10.2993	-109.199	0_250m	10	Cnidaria	Anthozoa	Scleractinia	Pocilloporidae	Pocillopora capitata	3	swollen cauliflour coral	1.2
UVC	UVC_Site_11		2016-03-17	10.2993	-109.199	0_250m	20	Cnidaria	Anthozoa	Scleractinia	Poritidae	Porites arnaudi	23	Porites arnaudi	9.2
UVC	UVC_Site_11		2016-03-17	10.2993	-109.199	0_250m	10	Cnidaria	Anthozoa	Scleractinia	Poritidae	Porites arnaudi	1	Porites arnaudi	0.4
UVC	UVC_Site_11		2016-03-17	10.2993	-109.199	0_250m	10	Chordata	Actinopterygii	Perciformes	Pomacentridae	Stegastes beebei	1.14	Galapagos ringtail damselfish	NA
UVC	UVC_Site_11		2016-03-17	10.2993	-109.199	0_250m	10	Cnidaria	Anthozoa	Scleractinia	Poritidae	Porites lutea	6	hump coral	2.4
UVC	UVC_Site_11		2016-03-17	10.2993	-109.199	0_250m	10	Chordata	Actinopterygii	Perciformes	Balistidae	Melichthys niger	0.0166667	Black triggerfish	NA
UVC	UVC_Site_11		2016-03-17	10.2993	-109.199	0_250m	20	Cnidaria	Anthozoa	Scleractinia	Agariciidae	Pavona clavus	1	swollen coral	0.4
UVC	UVC_Site_11		2016-03-17	10.2993	-109.199	0_250m	20	Cnidaria	Anthozoa	Scleractinia	Agariciidae	Leptoseris incrustans	7	crust coral	2.8
UVC	UVC_Site_11		2016-03-17	10.2993	-109.199	0_250m	20	Chordata	Actinopterygii	Perciformes	Labridae	Novaculichthys taeniourus	0.02	Rockmover wrasse	NA
UVC	UVC_Site_11		2016-03-17	10.2993	-109.199	0_250m	20	Chordata	Actinopterygii	Tetraodontiformes	Tetraodontidae	Canthigaster punctatissima	0.0133333	Spotted sharpmose puffer	NA
UVC	UVC_Site_11		2016-03-17	10.2993	-109.199	0_250m	10	Chordata	Actinopterygii	Perciformes	Labridae	Bodianus diplotaenia	0.00333333	Mexican hogfish	NA
UVC	UVC_Site_11		2016-03-17	10.2993	-109.199	0_250m	10	Chordata	Actinopterygii	Perciformes	Serranidae	Paranthias colonus	2.17333	Pacific creolefish	NA
UVC	UVC_Site_11		2016-03-17	10.2993	-109.199	0_250m	20	Chordata	Actinopterygii	Perciformes	Serranidae	Paranthias colonus	5.00667	Pacific creolefish	NA
UVC	UVC_Site_11		2016-03-17	10.2993	-109.199	0_250m	20	Chordata	Actinopterygii	Beryciformes	Holocentridae	Myripristis berndti	0.00333333	Blotcheye soldierfish	NA
UVC	UVC_Site_11		2016-03-17	10.2993	-109.199	0_250m	10	Cnidaria	Anthozoa	Scleractinia	Agariciidae	Pavona clavus	6	swollen coral	2.4
UVC	UVC_Site_11		2016-03-17	10.2993	-109.199	0_250m	20	Chordata	Actinopterygii	Perciformes	Balistidae	Melichthys niger	0.0133333	Black triggerfish	NA
UVC	UVC_Site_11		2016-03-17	10.2993	-109.199	0_250m	20	Chordata	Actinopterygii	Perciformes	Carangidae	Caranx melampygus	0.01	Bluefin trevally	NA
UVC	UVC_Site_11		2016-03-17	10.2993	-109.199	0_250m	10	Cnidaria	Anthozoa	Scleractinia	Poritidae	Porites lobata	37	lobe coral	14.8
UVC	UVC_Site_11		2016-03-17	10.2993	-109.199	0_250m	20	Chordata	Actinopterygii	Perciformes	Labridae	Thalassoma robertsoni	2.92	Clipperton rainbow wrasse	NA
UVC	UVC_Site_11		2016-03-17	10.2993	-109.199	0_250m	20	Chordata	Actinopterygii	Perciformes	Blenniidae	Ophioblennius steindachneri	0.00666667	Large banded blenny	NA
UVC	UVC_Site_11		2016-03-17	10.2993	-109.199	0_250m	10	Chordata	Actinopterygii	Perciformes	Scaridae	Scarus rubroviolaceus	0.02	Redlip parrotfish	NA
UVC	UVC_Site_11		2016-03-17	10.2993	-109.199	0_250m	10	Chordata	Actinopterygii	Perciformes	Acanthuridae	Acanthurus nigricans	0.193333	White cheek surgeonfish	NA
UVC	UVC_Site_11		2016-03-17	10.2993	-109.199	0_250m	10	Chordata	Actinopterygii	Perciformes	Carangidae	Caranx sexfasciatus	0.00333333	White cheek surgeonfish	NA
UVC	UVC_Site_11		2016-03-17	10.2993	-109.199	0_250m	10	Chordata	Actinopterygii	Perciformes	Carangidae	Caranx lugubris	0.00333333	Black jack	NA
UVC	UVC_Site_11		2016-03-17	10.2993	-109.199	0_250m	10	Cnidaria	Anthozoa	Scleractinia	Pocilloporidae	Pocillopora effusus	26	stony cauliflour coral	10.4
UVC	UVC_Site_11		2016-03-17	10.2993	-109.199	0_250m	10	Chordata	Actinopterygii	Perciformes	Carangidae	Caranx melampygus	0.0266667	Bluefin trevally	NA
UVC	UVC_Site_11		2016-03-17	10.2993	-109.199	0_250m	20	Chordata	Actinopterygii	Perciformes	Carangidae	Caranx lugubris	0.04	Black jack	NA
UVC	UVC_Site_11		2016-03-17	10.2993	-109.199	0_250m	10	Chordata	Actinopterygii	Perciformes	Labridae	Thalassoma grammaticum	0.0666667	Sunset wrasse	NA
UVC	UVC_Site_11		2016-03-17	10.2993	-109.199	0_250m	20	Chordata	Actinopterygii	Perciformes	Kyphosidae	Kyphosus elegans	0.00333333	Cortez sea chub	NA
UVC	UVC_Site_11		2016-03-17	10.2993	-109.199	0_250m	20	Chordata	Actinopterygii	Scorpaeniformes	Caracanthidae	Caracanthus maculatus	0.02	Spotted coral croucher	NA
UVC	UVC_Site_11		2016-03-17	10.2993	-109.199	0_250m	10	Chordata	Actinopterygii	Perciformes	Cirrhitidae	Cirrhitichthys oxycephalus	0.12	Coral hawkfish	NA
UVC	UVC_Site_11		2016-03-17	10.2993	-109.199	0_250m	20	Chordata	Actinopterygii	Perciformes	Labridae	Stethojulis bandanensis	0.00666667	Red shoulder wrasse	NA
UVC	UVC_Site_11		2016-03-17	10.2993	-109.199	0_250m	10	Chordata	Actinopterygii	Tetraodontiformes	Tetraodontidae	Arothron meleagris	0.02	Golden puffer	NA
UVC	UVC_Site_11		2016-03-17	10.2993	-109.199	0_250m	20	Cnidaria	Anthozoa	Scleractinia	Poritidae	Porites lobata	32	lobe coral	12.8
UVC	UVC_Site_11		2016-03-17	10.2993	-109.199	0_250m	20	Chordata	Actinopterygii	Perciformes	Serranidae	Epinephelus labriformis	0.0333333	Starry grouper	NA
UVC	UVC_Site_11		2016-03-17	10.2993	-109.199	0_250m	20	Cnidaria	Anthozoa	Scleractinia	Agariciidae	Pavona varians	4	false brain coral	1.6
UVC	UVC_Site_11		2016-03-17	10.2993	-109.199	0_250m	20	Chordata	Actinopterygii	Anguilliformes	Muraenidae	Gymnothorax dovii	0.00333333	Speckled moray	NA
UVC	UVC_Site_11		2016-03-17	10.2993	-109.199	0_250m	20	Chordata	Actinopterygii	Perciformes	Labridae	Thalassoma grammaticum	0.0533333	Sunset wrasse	NA
UVC	UVC_Site_11		2016-03-17	10.2993	-109.199	0_250m	20	Chordata	Actinopterygii	Tetraodontiformes	Tetraodontidae	Arothron meleagris	0.00666667	Golden puffer	NA
UVC	UVC_Site_11		2016-03-17	10.2993	-109.199	0_250m	20	Cnidaria	Anthozoa	Scleractinia	Agariciidae	Pavona maldivensis	2	maldives coral	0.8
UVC	UVC_Site_11		2016-03-17	10.2993	-109.199	0_250m	20	Chordata	Actinopterygii	Perciformes	Kyphosidae	Sectator ocyurus	0.02	Bluestriped chub	NA
UVC	UVC_Site_11		2016-03-17	10.2993	-109.199	0_250m	10	Chordata	Actinopterygii	Perciformes	Zanclidae	Zanclus cornutus	0.00666667	Moorish idol	NA
UVC	UVC_Site_11		2016-03-17	10.2993	-109.199	0_250m	20	Chordata	Actinopterygii	Perciformes	Zanclidae	Zanclus cornutus	0.0333333	Moorish idol	NA
UVC	UVC_Site_11		2016-03-17	10.2993	-109.199	0_250m	10	Chordata	Actinopterygii	Tetraodontiformes	Balistidae	Sufflamen verres	0.01	Orangside triggerfish	NA
UVC	UVC_Site_11		2016-03-17	10.2993	-109.199	0_250m	20	Chordata	Actinopterygii	Tetraodontiformes	Balistidae	Sufflamen verres	0.02	Orangside triggerfish	NA
UVC	UVC_Site_11		2016-03-17	10.2993	-109.199	0_250m	20	Chordata	Actinopterygii	Perciformes	Cirrhitidae	Cirrhitichthys oxycephalus	0.146667	Coral hawkfish	NA
UVC	UVC_Site_11		2016-03-17	10.2993	-109.199	0_250m	10	Cnidaria	Anthozoa	Scleractinia	Pocilloporidae	Pocillopora elegans	1	elegant cauliflour coral	0.4
UVC	UVC_Site_12		2016-03-17	10.2884	-109.204	0_250m	10	Chordata	Actinopterygii	Perciformes	Cirrhitidae	Cirrhitichthys oxycephalus	0.146667	Coral hawkfish	NA
UVC	UVC_Site_12		2016-03-17	10.2884	-109.204	0_250m	20	Chordata	Actinopterygii	Perciformes	Serranidae	Dermatolepis dermatolepis	0.02	Leather bass	NA
UVC	UVC_Site_12		2016-03-17	10.2884	-109.204	0_250m	10	Chordata	Actinopterygii	Perciformes	Serranidae	Dermatolepis dermatolepis	0.01	Leather bass	NA
UVC	UVC_Site_12		2016-03-17	10.2884	-109.204	0_250m	10	Chordata	Actinopterygii	Perciformes	Pomacentridae	Stegastes beebei	1.24	Galapagos ringtail damselfish	NA
UVC	UVC_Site_12		2016-03-17	10.2884	-109.204	0_250m	20	Chordata	Actinopterygii	Perciformes	Pomacentridae	Stegastes beebei	0.22	Galapagos ringtail damselfish	NA
UVC	UVC_Site_12		2016-03-17	10.2884	-109.204	0_250m	10	Chordata	Actinopterygii	Perciformes	Pomacanthidae	Holacanthus clarionensis	0.00666667	Clarion angelfish	NA
UVC	UVC_Site_12		2016-03-17	10.2884	-109.204	0_250m	10	Chordata	Actinopterygii	Perciformes	Scaridae	Scarus rubroviolaceus	0.0166667	Redlip parrotfish	NA
UVC	UVC_Site_12		2016-03-17	10.2884	-109.204	0_250m	20	Chordata	Actinopterygii	Perciformes	Scaridae	Scarus rubroviolaceus	0.00666667	Redlip parrotfish	NA
UVC	UVC_Site_12		2016-03-17	10.2884	-109.204	0_250m	20	Chordata	Actinopterygii	Perciformes	Chaetodontidae	Forcipiger flavissimus	0.00666667	Yellow longnose butterfly	NA
UVC	UVC_Site_12		2016-03-17	10.2884	-109.204	0_250m	10	Chordata	Actinopterygii	Perciformes	Serranidae	Epinephelus labriformis	0.06	Starry grouper	NA
UVC	UVC_Site_12		2016-03-17	10.2884	-109.204	0_250m	20	Chordata	Actinopterygii	Perciformes	Kyphosidae	Kyphosus elegans	0.00333333	Cortez sea chub	NA
UVC	UVC_Site_12		2016-03-17	10.2884	-109.204	0_250m	20	Chordata	Actinopterygii	Perciformes	Pomacanthidae	Holacanthus clarionensis	0.0133333	Clarion angelfish	NA
UVC	UVC_Site_12		2016-03-17	10.2884	-109.204	0_250m	20	Chordata	Actinopterygii	Perciformes	Cirrhitidae	Cirrhitichthys oxycephalus	0.06	Coral hawkfish	NA
UVC	UVC_Site_12		2016-03-17	10.2884	-109.204	0_250m	10	Chordata	Actinopterygii	Perciformes	Kyphosidae	Kyphosus elegans	0.00666667	Cortez sea chub	NA
UVC	UVC_Site_12		2016-03-17	10.2884	-109.204	0_250m	10	Chordata	Actinopterygii	Perciformes	Serranidae	Epinephelus clippertonensis	0.00333333	Clipperton grouper	NA
UVC	UVC_Site_12		2016-03-17	10.2884	-109.204	0_250m	20	Chordata	Actinopterygii	Perciformes	Serranidae	Epinephelus clippertonensis	0.00666667	Clipperton grouper	NA
UVC	UVC_Site_12		2016-03-17	10.2884	-109.204	0_250m	20	Chordata	Actinopterygii	Perciformes	Serranidae	Epinephelus labriformis	0.0466667	Starry grouper	NA
UVC	UVC_Site_12		2016-03-17	10.2884	-109.204	0_250m	10	Chordata	Actinopterygii	Perciformes	Labridae	Bodianus diplotaenia	0.00666667	Mexican hogfish	NA
UVC	UVC_Site_12		2016-03-17	10.2884	-109.204	0_250m	10	Chordata	Actinopterygii	Tetraodontiformes	Monacanthidae	Cantherhines dumerilii	0.00333333	Barred filefish	NA
UVC	UVC_Site_12		2016-03-17	10.2884	-109.204	0_250m	20	Cnidaria	Anthozoa	Scleractinia	Pocilloporidae	Pocillopora eydouxi	1	antler coral	0.4
UVC	UVC_Site_12		2016-03-17	10.2884	-109.204	0_250m	10	Cnidaria	Anthozoa	Scleractinia	Pocilloporidae	Pocillopora elegans	1	elegant cauliflour coral	0.4
UVC	UVC_Site_12		2016-03-17	10.2884	-109.204	0_250m	20	Chordata	Actinopterygii	Perciformes	Labridae	Bodianus diplotaenia	0.00666667	Mexican hogfish	NA
UVC	UVC_Site_12		2016-03-17	10.2884	-109.204	0_250m	20	Chordata	Actinopterygii	Perciformes	Acanthuridae	Ctenochaetus marginatus	0.08	Stripedfin surgeonfish	NA
UVC	UVC_Site_12		2016-03-17	10.2884	-109.204	0_250m	10	Cnidaria	Anthozoa	Scleractinia	Poritidae	Porites lobata	59	lobe coral	23.6
UVC	UVC_Site_12		2016-03-17	10.2884	-109.204	0_250m	10	Chordata	Actinopterygii	Tetraodontiformes	Tetraodontidae	Arothron meleagris	0.01	Golden puffer	NA
UVC	UVC_Site_12		2016-03-17	10.2884	-109.204	0_250m	20	Chordata	Actinopterygii	Tetraodontiformes	Tetraodontidae	Arothron meleagris	0.0266667	Golden puffer	NA
UVC	UVC_Site_12		2016-03-17	10.2884	-109.204	0_250m	10	Cnidaria	Anthozoa	Scleractinia	Pocilloporidae	Pocillopora effusus	19	stony cauliflour coral	7.6
UVC	UVC_Site_12		2016-03-17	10.2884	-109.204	0_250m	10	Chordata	Actinopterygii	Perciformes	Acanthuridae	Ctenochaetus marginatus	0.196667	Stripedfin surgeonfish	NA
UVC	UVC_Site_12		2016-03-17	10.2884	-109.204	0_250m	10	Chordata	Actinopterygii	Perciformes	Acanthuridae	Acanthurus triostegus	0.246667	Convict tang	NA
UVC	UVC_Site_12		2016-03-17	10.2884	-109.204	0_250m	10	Chordata	Actinopterygii	Anguilliformes	Muraenidae	Gymnomuraena zebra	0.00333333	Zebra moray	NA
UVC	UVC_Site_12		2016-03-17	10.2884	-109.204	0_250m	10	Chordata	Actinopterygii	Anguilliformes	Muraenidae	Gymnothorax dovii	0.00666667	Speckled moray	NA
UVC	UVC_Site_12		2016-03-17	10.2884	-109.204	0_250m	20	Chordata	Actinopterygii	Perciformes	Carangidae	Caranx lugubris	0.01	Black jack	NA
UVC	UVC_Site_12		2016-03-17	10.2884	-109.204	0_250m	20	Cnidaria	Anthozoa	Scleractinia	Agariciidae	Pavona clavus	4	swollen coral	1.6
UVC	UVC_Site_12		2016-03-17	10.2884	-109.204	0_250m	20	Cnidaria	Anthozoa	Scleractinia	Poritidae	Porites lobata	15	lobe coral	6
UVC	UVC_Site_12		2016-03-17	10.2884	-109.204	0_250m	10	Cnidaria	Anthozoa	Scleractinia	Agariciidae	Pavona varians	1	false brain coral	0.4
UVC	UVC_Site_12		2016-03-17	10.2884	-109.204	0_250m	10	Cnidaria	Anthozoa	Scleractinia	Agariciidae	Pavona maldivensis	1	maldives coral	0.4
UVC	UVC_Site_12		2016-03-17	10.2884	-109.204	0_250m	20	Chordata	Actinopterygii	Beryciformes	Holocentridae	Myripristis berndti	0.04	Blotcheye soldierfish	NA
UVC	UVC_Site_12		2016-03-17	10.2884	-109.204	0_250m	20	Cnidaria	Anthozoa	Scleractinia	Agariciidae	Pavona varians	7	false brain coral	2.8
UVC	UVC_Site_12		2016-03-17	10.2884	-109.204	0_250m	20	Chordata	Actinopterygii	Perciformes	Acanthuridae	Acanthurus nigricans	0.266667	White cheek surgeonfish	NA
UVC	UVC_Site_12		2016-03-17	10.2884	-109.204	0_250m	20	Chordata	Actinopterygii	Perciformes	Carangidae	Caranx sexfasciatus	0.01	White cheek surgeonfish	NA
UVC	UVC_Site_12		2016-03-17	10.2884	-109.204	0_250m	10	Chordata	Actinopterygii	Perciformes	Acanthuridae	Acanthurus nigricans	0.19	White cheek surgeonfish	NA
UVC	UVC_Site_12		2016-03-17	10.2884	-109.204	0_250m	10	Cnidaria	Anthozoa	Scleractinia	Agariciidae	Pavona clavus	2	swollen coral	0.8
UVC	UVC_Site_12		2016-03-17	10.2884	-109.204	0_250m	10	Chordata	Actinopterygii	Perciformes	Labridae	Stethojulis bandanensis	0.0133333	Red shoulder wrasse	NA
UVC	UVC_Site_12		2016-03-17	10.2884	-109.204	0_250m	20	Cnidaria	Anthozoa	Scleractinia	Agariciidae	Leptoseris incrustans	2	crust coral	0.8
UVC	UVC_Site_12		2016-03-17	10.2884	-109.204	0_250m	20	Chordata	Actinopterygii	Perciformes	Labridae	Stethojulis bandanensis	0.00666667	Red shoulder wrasse	NA
UVC	UVC_Site_12		2016-03-17	10.2884	-109.204	0_250m	10	Cnidaria	Anthozoa	Scleractinia	Poritidae	Porites lutea	5	hump coral	2
UVC	UVC_Site_12		2016-03-17	10.2884	-109.204	0_250m	10	Chordata	Actinopterygii	Tetraodontiformes	Ostraciidae	Ostracion meleagris	0.00666667	White spotted box fish	NA
UVC	UVC_Site_12		2016-03-17	10.2884	-109.204	0_250m	10	Chordata	Actinopterygii	Perciformes	Labridae	Thalassoma virens	0.02	Emerald wrasse	NA
UVC	UVC_Site_12		2016-03-17	10.2884	-109.204	0_250m	10	Chordata	Actinopterygii	Perciformes	Labridae	Thalassoma grammaticum	0.0266667	Sunset wrasse	NA
UVC	UVC_Site_12		2016-03-17	10.2884	-109.204	0_250m	10	Chordata	Actinopterygii	Perciformes	Serranidae	Paranthias colonus	0.293333	Pacific creolefish	NA
UVC	UVC_Site_12		2016-03-17	10.2884	-109.204	0_250m	20	Chordata	Actinopterygii	Perciformes	Serranidae	Paranthias colonus	3.85	Pacific creolefish	NA
UVC	UVC_Site_12		2016-03-17	10.2884	-109.204	0_250m	20	Chordata	Actinopterygii	Perciformes	Labridae	Thalassoma grammaticum	0.04	Sunset wrasse	NA
UVC	UVC_Site_12		2016-03-17	10.2884	-109.204	0_250m	20	Cnidaria	Anthozoa	Scleractinia	Poritidae	Porites arnaudi	28	Porites arnaudi	11.2
UVC	UVC_Site_12		2016-03-17	10.2884	-109.204	0_250m	10	Chordata	Actinopterygii	Perciformes	Carangidae	Caranx sexfasciatus	0.136667	White cheek surgeonfish	NA
UVC	UVC_Site_12		2016-03-17	10.2884	-109.204	0_250m	10	Cnidaria	Anthozoa	Scleractinia	Poritidae	Porites arnaudi	3	Porites arnaudi	1.2
UVC	UVC_Site_12		2016-03-17	10.2884	-109.204	0_250m	20	Chordata	Actinopterygii	Perciformes	Zanclidae	Zanclus cornutus	0.06	Moorish idol	NA
UVC	UVC_Site_12		2016-03-17	10.2884	-109.204	0_250m	10	Cnidaria	Anthozoa	Scleractinia	Pocilloporidae	Pocillopora woodjonesi	1	stony coral	0.4
UVC	UVC_Site_12		2016-03-17	10.2884	-109.204	0_250m	20	Chordata	Actinopterygii	Perciformes	Carangidae	Caranx melampygus	0.0166667	Bluefin trevally	NA
UVC	UVC_Site_12		2016-03-17	10.2884	-109.204	0_250m	10	Chordata	Actinopterygii	Perciformes	Carangidae	Caranx melampygus	0.0433333	Bluefin trevally	NA
UVC	UVC_Site_12		2016-03-17	10.2884	-109.204	0_250m	20	Chordata	Actinopterygii	Perciformes	Balistidae	Melichthys niger	0.00333333	Black triggerfish	NA
UVC	UVC_Site_12		2016-03-17	10.2884	-109.204	0_250m	20	Chordata	Actinopterygii	Perciformes	Labridae	Thalassoma robertsoni	1.10667	Clipperton rainbow wrasse	NA
UVC	UVC_Site_12		2016-03-17	10.2884	-109.204	0_250m	10	Chordata	Actinopterygii	Perciformes	Balistidae	Melichthys niger	0.0566667	Black triggerfish	NA
UVC	UVC_Site_12		2016-03-17	10.2884	-109.204	0_250m	10	Chordata	Actinopterygii	Tetraodontiformes	Balistidae	Sufflamen verres	0.02	Orangside triggerfish	NA
UVC	UVC_Site_12		2016-03-17	10.2884	-109.204	0_250m	20	Cnidaria	Anthozoa	Scleractinia	Pocilloporidae	Pocillopora meandrina	2	cauliflour coral	0.8
UVC	UVC_Site_12		2016-03-17	10.2884	-109.204	0_250m	10	Chordata	Actinopterygii	Perciformes	Labridae	Thalassoma robertsoni	1.23333	Clipperton rainbow wrasse	NA
UVC	UVC_Site_13		2016-03-19	10.3154	-109.236	0_250m	10	Chordata	Actinopterygii	Perciformes	Labridae	Thalassoma grammaticum	0.06	Sunset wrasse	NA
UVC	UVC_Site_13		2016-03-19	10.3154	-109.236	0_250m	10	Chordata	Actinopterygii	Perciformes	Pomacentridae	Stegastes beebei	0.486667	Galapagos ringtail damselfish	NA
UVC	UVC_Site_13		2016-03-19	10.3154	-109.236	0_250m	10	Cnidaria	Anthozoa	Scleractinia	Poritidae	Porites arnaudi	3	Porites arnaudi	1.2
UVC	UVC_Site_13		2016-03-19	10.3154	-109.236	0_250m	20	Cnidaria	Anthozoa	Scleractinia	Poritidae	Porites arnaudi	83	Porites arnaudi	33.2
UVC	UVC_Site_13		2016-03-19	10.3154	-109.236	0_250m	20	Cnidaria	Anthozoa	Scleractinia	Agariciidae	Pavona varians	27	false brain coral	10.8
UVC	UVC_Site_13		2016-03-19	10.3154	-109.236	0_250m	20	Cnidaria	Anthozoa	Scleractinia	Pocilloporidae	Pocillopora effusus	7	stony cauliflour coral	2.8
UVC	UVC_Site_13		2016-03-19	10.3154	-109.236	0_250m	10	Cnidaria	Anthozoa	Scleractinia	Pocilloporidae	Pocillopora elegans	1	elegant cauliflour coral	0.4
UVC	UVC_Site_13		2016-03-19	10.3154	-109.236	0_250m	20	Chordata	Actinopterygii	Perciformes	Labridae	Thalassoma grammaticum	0.0466667	Sunset wrasse	NA
UVC	UVC_Site_13		2016-03-19	10.3154	-109.236	0_250m	10	Chordata	Actinopterygii	Perciformes	Labridae	Thalassoma robertsoni	2.46	Clipperton rainbow wrasse	NA
UVC	UVC_Site_13		2016-03-19	10.3154	-109.236	0_250m	20	Chordata	Actinopterygii	Perciformes	Pomacanthidae	Holacanthus clarionensis	0.0866667	Clarion angelfish	NA
UVC	UVC_Site_13		2016-03-19	10.3154	-109.236	0_250m	20	Chordata	Actinopterygii	Perciformes	Labridae	Thalassoma robertsoni	1.68	Clipperton rainbow wrasse	NA
UVC	UVC_Site_13		2016-03-19	10.3154	-109.236	0_250m	10	Chordata	Actinopterygii	Perciformes	Pomacanthidae	Holacanthus clarionensis	0.0266667	Clarion angelfish	NA
UVC	UVC_Site_13		2016-03-19	10.3154	-109.236	0_250m	10	Cnidaria	Anthozoa	Scleractinia	Agariciidae	Pavona varians	8	false brain coral	3.2
UVC	UVC_Site_13		2016-03-19	10.3154	-109.236	0_250m	10	Chordata	Actinopterygii	Perciformes	Scaridae	Scarus rubroviolaceus	0.01	Redlip parrotfish	NA
UVC	UVC_Site_13		2016-03-19	10.3154	-109.236	0_250m	10	Chordata	Actinopterygii	Perciformes	Labridae	Thalassoma purpureum	0.00666667	Surge wrasse	NA
UVC	UVC_Site_13		2016-03-19	10.3154	-109.236	0_250m	10	Chordata	Actinopterygii	Perciformes	Labridae	Stethojulis bandanensis	0.0133333	Red shoulder wrasse	NA
UVC	UVC_Site_13		2016-03-19	10.3154	-109.236	0_250m	20	Chordata	Actinopterygii	Perciformes	Scaridae	Scarus rubroviolaceus	0.0133333	Redlip parrotfish	NA
UVC	UVC_Site_13		2016-03-19	10.3154	-109.236	0_250m	20	Cnidaria	Anthozoa	Scleractinia	Pocilloporidae	Pocillopora meandrina	1	cauliflour coral	0.4
UVC	UVC_Site_13		2016-03-19	10.3154	-109.236	0_250m	10	Cnidaria	Anthozoa	Scleractinia	Pocilloporidae	Pocillopora effusus	71	stony cauliflour coral	28.4
UVC	UVC_Site_13		2016-03-19	10.3154	-109.236	0_250m	10	Cnidaria	Anthozoa	Scleractinia	Pocilloporidae	Pocillopora eydouxi	2	antler coral	0.8
UVC	UVC_Site_13		2016-03-19	10.3154	-109.236	0_250m	20	Chordata	Actinopterygii	Perciformes	Labridae	Stethojulis bandanensis	0.0133333	Red shoulder wrasse	NA
UVC	UVC_Site_13		2016-03-19	10.3154	-109.236	0_250m	20	Chordata	Actinopterygii	Anguilliformes	Muraenidae	Gymnothorax dovii	0.01	Speckled moray	NA
UVC	UVC_Site_13		2016-03-19	10.3154	-109.236	0_250m	20	Cnidaria	Anthozoa	Scleractinia	Dendrophylliidae	Tubastraea coccinea	1	orange cup coral	0.4
UVC	UVC_Site_13		2016-03-19	10.3154	-109.236	0_250m	10	Cnidaria	Anthozoa	Scleractinia	Pocilloporidae	Pocillopora capitata	1	swollen cauliflour coral	0.4
UVC	UVC_Site_13		2016-03-19	10.3154	-109.236	0_250m	20	Cnidaria	Anthozoa	Scleractinia	Pocilloporidae	Pocillopora verrucosa	2	warty cauliflour coral	0.8
UVC	UVC_Site_13		2016-03-19	10.3154	-109.236	0_250m	10	Cnidaria	Anthozoa	Scleractinia	Pocilloporidae	Pocillopora verrucosa	2	warty cauliflour coral	0.8
UVC	UVC_Site_13		2016-03-19	10.3154	-109.236	0_250m	20	Cnidaria	Anthozoa	Scleractinia	Pocilloporidae	Pocillopora capitata	6	swollen cauliflour coral	2.4
UVC	UVC_Site_13		2016-03-19	10.3154	-109.236	0_250m	20	Chordata	Actinopterygii	Perciformes	Pomacentridae	Stegastes beebei	0.353333	Galapagos ringtail damselfish	NA
UVC	UVC_Site_13		2016-03-19	10.3154	-109.236	0_250m	20	Chordata	Actinopterygii	Perciformes	Balistidae	Melichthys niger	0.29	Black triggerfish	NA
UVC	UVC_Site_13		2016-03-19	10.3154	-109.236	0_250m	20	Chordata	Actinopterygii	Perciformes	Acanthuridae	Ctenochaetus marginatus	0.146667	Stripedfin surgeonfish	NA
UVC	UVC_Site_13		2016-03-19	10.3154	-109.236	0_250m	20	Chordata	Actinopterygii	Perciformes	Cirrhitidae	Cirrhitus rivulatus	0.00333333	Giant hawkfish	NA
UVC	UVC_Site_13		2016-03-19	10.3154	-109.236	0_250m	10	Chordata	Actinopterygii	Perciformes	Cirrhitidae	Cirrhitichthys oxycephalus	0.14	Coral hawkfish	NA
UVC	UVC_Site_13		2016-03-19	10.3154	-109.236	0_250m	20	Cnidaria	Anthozoa	Scleractinia	Agariciidae	Pavona clavus	1	swollen coral	0.4
UVC	UVC_Site_13		2016-03-19	10.3154	-109.236	0_250m	20	Chordata	Actinopterygii	Tetraodontiformes	Monacanthidae	Cantherhines dumerilii	0.00666667	Barred filefish	NA
UVC	UVC_Site_13		2016-03-19	10.3154	-109.236	0_250m	10	Chordata	Actinopterygii	Perciformes	Carangidae	Caranx lugubris	0.00666667	Black jack	NA
UVC	UVC_Site_13		2016-03-19	10.3154	-109.236	0_250m	20	Chordata	Actinopterygii	Perciformes	Carangidae	Caranx lugubris	0.0133333	Black jack	NA
UVC	UVC_Site_13		2016-03-19	10.3154	-109.236	0_250m	20	Chordata	Actinopterygii	Perciformes	Serranidae	Epinephelus clippertonensis	0.00333333	Clipperton grouper	NA
UVC	UVC_Site_13		2016-03-19	10.3154	-109.236	0_250m	20	Chordata	Actinopterygii	Tetraodontiformes	Balistidae	Sufflamen verres	0.04	Orangside triggerfish	NA
UVC	UVC_Site_13		2016-03-19	10.3154	-109.236	0_250m	10	Chordata	Actinopterygii	Perciformes	Acanthuridae	Ctenochaetus marginatus	0.0566667	Stripedfin surgeonfish	NA
UVC	UVC_Site_13		2016-03-19	10.3154	-109.236	0_250m	10	Chordata	Actinopterygii	Perciformes	Balistidae	Melichthys niger	0.0366667	Black triggerfish	NA
UVC	UVC_Site_13		2016-03-19	10.3154	-109.236	0_250m	20	Chordata	Actinopterygii	Perciformes	Cirrhitidae	Cirrhitichthys oxycephalus	0.106667	Coral hawkfish	NA
UVC	UVC_Site_13		2016-03-19	10.3154	-109.236	0_250m	20	Chordata	Actinopterygii	Perciformes	Zanclidae	Zanclus cornutus	0.00666667	Moorish idol	NA
UVC	UVC_Site_13		2016-03-19	10.3154	-109.236	0_250m	10	Chordata	Actinopterygii	Perciformes	Zanclidae	Zanclus cornutus	0.0133333	Moorish idol	NA
UVC	UVC_Site_13		2016-03-19	10.3154	-109.236	0_250m	10	Chordata	Actinopterygii	Perciformes	Blenniidae	Ophioblennius steindachneri	0.04	Large banded blenny	NA
UVC	UVC_Site_13		2016-03-19	10.3154	-109.236	0_250m	10	Chordata	Actinopterygii	Perciformes	Carangidae	Caranx melampygus	0.0466667	Bluefin trevally	NA
UVC	UVC_Site_13		2016-03-19	10.3154	-109.236	0_250m	20	Chordata	Actinopterygii	Perciformes	Carangidae	Caranx melampygus	0.0333333	Bluefin trevally	NA
UVC	UVC_Site_13		2016-03-19	10.3154	-109.236	0_250m	10	Chordata	Actinopterygii	Perciformes	Serranidae	Epinephelus labriformis	0.03	Starry grouper	NA
UVC	UVC_Site_13		2016-03-19	10.3154	-109.236	0_250m	20	Chordata	Actinopterygii	Perciformes	Serranidae	Epinephelus labriformis	0.0633333	Starry grouper	NA
UVC	UVC_Site_13		2016-03-19	10.3154	-109.236	0_250m	20	Chordata	Actinopterygii	Perciformes	Serranidae	Paranthias colonus	2.60667	Pacific creolefish	NA
UVC	UVC_Site_13		2016-03-19	10.3154	-109.236	0_250m	10	Chordata	Actinopterygii	Perciformes	Serranidae	Paranthias colonus	1.3	Pacific creolefish	NA
UVC	UVC_Site_13		2016-03-19	10.3154	-109.236	0_250m	10	Chordata	Actinopterygii	Tetraodontiformes	Balistidae	Sufflamen verres	0.01	Orangside triggerfish	NA
UVC	UVC_Site_13		2016-03-19	10.3154	-109.236	0_250m	10	Cnidaria	Anthozoa	Scleractinia	Agariciidae	Pavona clavus	4	swollen coral	1.6
UVC	UVC_Site_13		2016-03-19	10.3154	-109.236	0_250m	20	Cnidaria	Anthozoa	Scleractinia	Agariciidae	Pavona maldivensis	2	maldives coral	0.8
UVC	UVC_Site_13		2016-03-19	10.3154	-109.236	0_250m	20	Chordata	Actinopterygii	Perciformes	Labridae	Bodianus diplotaenia	0.00666667	Mexican hogfish	NA
UVC	UVC_Site_13		2016-03-19	10.3154	-109.236	0_250m	10	Chordata	Actinopterygii	Perciformes	Acanthuridae	Acanthurus triostegus	0.133333	Convict tang	NA
UVC	UVC_Site_13		2016-03-19	10.3154	-109.236	0_250m	10	Chordata	Actinopterygii	Tetraodontiformes	Tetraodontidae	Arothron meleagris	0.02	Golden puffer	NA
UVC	UVC_Site_13		2016-03-19	10.3154	-109.236	0_250m	10	Cnidaria	Anthozoa	Scleractinia	Poritidae	Porites lobata	13	lobe coral	5.2
UVC	UVC_Site_13		2016-03-19	10.3154	-109.236	0_250m	10	Cnidaria	Anthozoa	Scleractinia	Poritidae	Porites lutea	7	hump coral	2.8
UVC	UVC_Site_13		2016-03-19	10.3154	-109.236	0_250m	20	Cnidaria	Anthozoa	Scleractinia	Poritidae	Porites lutea	17	hump coral	6.8
UVC	UVC_Site_13		2016-03-19	10.3154	-109.236	0_250m	20	Cnidaria	Anthozoa	Scleractinia	Poritidae	Porites lobata	41	lobe coral	16.4
UVC	UVC_Site_13		2016-03-19	10.3154	-109.236	0_250m	20	Chordata	Actinopterygii	Tetraodontiformes	Tetraodontidae	Arothron meleagris	0.0133333	Golden puffer	NA
UVC	UVC_Site_13		2016-03-19	10.3154	-109.236	0_250m	20	Chordata	Actinopterygii	Perciformes	Serranidae	Dermatolepis dermatolepis	0.0266667	Leather bass	NA
UVC	UVC_Site_13		2016-03-19	10.3154	-109.236	0_250m	10	Chordata	Actinopterygii	Perciformes	Acanthuridae	Acanthurus nigricans	0.09	White cheek surgeonfish	NA
UVC	UVC_Site_13		2016-03-19	10.3154	-109.236	0_250m	20	Chordata	Actinopterygii	Perciformes	Acanthuridae	Acanthurus nigricans	0.153333	White cheek surgeonfish	NA
UVC	UVC_Site_13		2016-03-19	10.3154	-109.236	0_250m	20	Chordata	Actinopterygii	Tetraodontiformes	Tetraodontidae	Canthigaster punctatissima	0.0333333	Spotted sharpmose puffer	NA
UVC	UVC_Site_13		2016-03-19	10.3154	-109.236	0_250m	10	Chordata	Actinopterygii	Perciformes	Serranidae	Dermatolepis dermatolepis	0.0133333	Leather bass	NA
UVC	UVC_Site_14		2016-03-19	10.3171	-109.217	0_250m	20	Chordata	Actinopterygii	Perciformes	Labridae	Thalassoma grammaticum	0.0133333	Sunset wrasse	NA
UVC	UVC_Site_14		2016-03-19	10.3171	-109.217	0_250m	10	Chordata	Actinopterygii	Perciformes	Labridae	Thalassoma grammaticum	0.106667	Sunset wrasse	NA
UVC	UVC_Site_14		2016-03-19	10.3171	-109.217	0_250m	20	Chordata	Actinopterygii	Perciformes	Lutjanidae	Lutjanus viridis	0.133333	Blue and gold snapper	NA
UVC	UVC_Site_14		2016-03-19	10.3171	-109.217	0_250m	10	Chordata	Actinopterygii	Perciformes	Pomacanthidae	Holacanthus clarionensis	0.0333333	Clarion angelfish	NA
UVC	UVC_Site_14		2016-03-19	10.3171	-109.217	0_250m	10	Chordata	Actinopterygii	Perciformes	Kyphosidae	Kyphosus elegans	0.00333333	Cortez sea chub	NA
UVC	UVC_Site_14		2016-03-19	10.3171	-109.217	0_250m	20	Chordata	Actinopterygii	Perciformes	Chaetodontidae	Forcipiger flavissimus	0.02	Yellow longnose butterfly	NA
UVC	UVC_Site_14		2016-03-19	10.3171	-109.217	0_250m	20	Chordata	Actinopterygii	Perciformes	Pomacanthidae	Holacanthus clarionensis	0.0133333	Clarion angelfish	NA
UVC	UVC_Site_14		2016-03-19	10.3171	-109.217	0_250m	10	Chordata	Actinopterygii	Perciformes	Lutjanidae	Lutjanus viridis	0.0433333	Blue and gold snapper	NA
UVC	UVC_Site_14		2016-03-19	10.3171	-109.217	0_250m	20	Chordata	Actinopterygii	Perciformes	Kyphosidae	Kyphosus elegans	0.12	Cortez sea chub	NA
UVC	UVC_Site_14		2016-03-19	10.3171	-109.217	0_250m	10	Chordata	Actinopterygii	Perciformes	Blenniidae	Ophioblennius steindachneri	0.00666667	Large banded blenny	NA
UVC	UVC_Site_14		2016-03-19	10.3171	-109.217	0_250m	20	Chordata	Actinopterygii	Perciformes	Labridae	Thalassoma robertsoni	0.54	Clipperton rainbow wrasse	NA
UVC	UVC_Site_14		2016-03-19	10.3171	-109.217	0_250m	10	Chordata	Actinopterygii	Perciformes	Labridae	Thalassoma purpureum	0.00333333	Surge wrasse	NA
UVC	UVC_Site_14		2016-03-19	10.3171	-109.217	0_250m	10	Chordata	Actinopterygii	Perciformes	Labridae	Thalassoma robertsoni	1.58667	Clipperton rainbow wrasse	NA
UVC	UVC_Site_14		2016-03-19	10.3171	-109.217	0_250m	10	Chordata	Actinopterygii	Perciformes	Balistidae	Melichthys niger	0.116667	Black triggerfish	NA
UVC	UVC_Site_14		2016-03-19	10.3171	-109.217	0_250m	20	Chordata	Actinopterygii	Perciformes	Carangidae	Caranx lugubris	0.0533333	Black jack	NA
UVC	UVC_Site_14		2016-03-19	10.3171	-109.217	0_250m	10	Chordata	Actinopterygii	Perciformes	Carangidae	Caranx lugubris	0.00666667	Black jack	NA
UVC	UVC_Site_14		2016-03-19	10.3171	-109.217	0_250m	10	Chordata	Actinopterygii	Perciformes	Mullidae	Mulloidichthys dentatus	0.0166667	Mexican goatfish	NA
UVC	UVC_Site_14		2016-03-19	10.3171	-109.217	0_250m	20	Cnidaria	Anthozoa	Scleractinia	Agariciidae	Pavona clavus	1	swollen coral	0.4
UVC	UVC_Site_14		2016-03-19	10.3171	-109.217	0_250m	10	Chordata	Actinopterygii	Anguilliformes	Muraenidae	Gymnothorax flavimarginatus	0.00666667	Yellow edged moray	NA
UVC	UVC_Site_14		2016-03-19	10.3171	-109.217	0_250m	10	Cnidaria	Anthozoa	Scleractinia	Poritidae	Porites lobata	122	lobe coral	48.8
UVC	UVC_Site_14		2016-03-19	10.3171	-109.217	0_250m	10	Chordata	Actinopterygii	Perciformes	Carangidae	Caranx melampygus	0.04	Bluefin trevally	NA
UVC	UVC_Site_14		2016-03-19	10.3171	-109.217	0_250m	10	Cnidaria	Anthozoa	Scleractinia	Agariciidae	Pavona maldivensis	4	maldives coral	1.6
UVC	UVC_Site_14		2016-03-19	10.3171	-109.217	0_250m	20	Chordata	Actinopterygii	Perciformes	Cirrhitidae	Cirrhitichthys oxycephalus	0.0133333	Coral hawkfish	NA
UVC	UVC_Site_14		2016-03-19	10.3171	-109.217	0_250m	10	Chordata	Actinopterygii	Perciformes	Cirrhitidae	Cirrhitichthys oxycephalus	0.206667	Coral hawkfish	NA
UVC	UVC_Site_14		2016-03-19	10.3171	-109.217	0_250m	10	Chordata	Actinopterygii	Perciformes	Serranidae	Epinephelus clippertonensis	0.00333333	Clipperton grouper	NA
UVC	UVC_Site_14		2016-03-19	10.3171	-109.217	0_250m	20	Chordata	Actinopterygii	Perciformes	Serranidae	Epinephelus clippertonensis	0.01	Clipperton grouper	NA
UVC	UVC_Site_14		2016-03-19	10.3171	-109.217	0_250m	10	Chordata	Actinopterygii	Beryciformes	Holocentridae	Myripristis berndti	0.00666667	Blotcheye soldierfish	NA
UVC	UVC_Site_14		2016-03-19	10.3171	-109.217	0_250m	20	Chordata	Actinopterygii	Beryciformes	Holocentridae	Myripristis berndti	0.47	Blotcheye soldierfish	NA
UVC	UVC_Site_14		2016-03-19	10.3171	-109.217	0_250m	10	Chordata	Actinopterygii	Beryciformes	Holocentridae	Myripristis gildi	0.00666667	Clipperton cardinal soldierfish	NA
UVC	UVC_Site_14		2016-03-19	10.3171	-109.217	0_250m	20	Chordata	Actinopterygii	Perciformes	Carangidae	Caranx melampygus	0.0166667	Bluefin trevally	NA
UVC	UVC_Site_14		2016-03-19	10.3171	-109.217	0_250m	10	Chordata	Actinopterygii	Perciformes	Serranidae	Epinephelus labriformis	0.143333	Starry grouper	NA
UVC	UVC_Site_14		2016-03-19	10.3171	-109.217	0_250m	20	Chordata	Actinopterygii	Perciformes	Serranidae	Epinephelus labriformis	0.06	Starry grouper	NA
UVC	UVC_Site_14		2016-03-19	10.3171	-109.217	0_250m	20	Chordata	Actinopterygii	Perciformes	Acanthuridae	Acanthurus nigricans	0.26	White cheek surgeonfish	NA
UVC	UVC_Site_14		2016-03-19	10.3171	-109.217	0_250m	20	Chordata	Chondrichthyes	Carcharhiniformes	Carcharhinidae	Carcharhinus albimarginatus	0.00666667	Silvertip shark	NA
UVC	UVC_Site_14		2016-03-19	10.3171	-109.217	0_250m	20	Cnidaria	Anthozoa	Scleractinia	Poritidae	Porites lobata	40	lobe coral	16
UVC	UVC_Site_14		2016-03-19	10.3171	-109.217	0_250m	20	Cnidaria	Anthozoa	Scleractinia	Poritidae	Porites lutea	1	hump coral	0.4
UVC	UVC_Site_14		2016-03-19	10.3171	-109.217	0_250m	10	Cnidaria	Anthozoa	Scleractinia	Poritidae	Porites lutea	4	hump coral	1.6
UVC	UVC_Site_14		2016-03-19	10.3171	-109.217	0_250m	10	Chordata	Actinopterygii	Perciformes	Acanthuridae	Acanthurus nigricans	0.313333	White cheek surgeonfish	NA
UVC	UVC_Site_14		2016-03-19	10.3171	-109.217	0_250m	10	Chordata	Actinopterygii	Tetraodontiformes	Monacanthidae	Cantherhines dumerilii	0.00666667	Barred filefish	NA
UVC	UVC_Site_14		2016-03-19	10.3171	-109.217	0_250m	10	Chordata	Actinopterygii	Perciformes	Serranidae	Paranthias colonus	1.83	Pacific creolefish	NA
UVC	UVC_Site_14		2016-03-19	10.3171	-109.217	0_250m	10	Chordata	Actinopterygii	Tetraodontiformes	Tetraodontidae	Canthigaster punctatissima	0.02	Spotted sharpmose puffer	NA
UVC	UVC_Site_14		2016-03-19	10.3171	-109.217	0_250m	20	Chordata	Actinopterygii	Perciformes	Carangidae	Caranx sexfasciatus	0.0833333	White cheek surgeonfish	NA
UVC	UVC_Site_14		2016-03-19	10.3171	-109.217	0_250m	10	Chordata	Actinopterygii	Perciformes	Chaetodontidae	Johnrandallia nigrirostris	0.00666667	Blacknosed butterflyfish	NA
UVC	UVC_Site_14		2016-03-19	10.3171	-109.217	0_250m	20	Chordata	Actinopterygii	Perciformes	Chaetodontidae	Johnrandallia nigrirostris	0.0866667	Blacknosed butterflyfish	NA
UVC	UVC_Site_14		2016-03-19	10.3171	-109.217	0_250m	20	Cnidaria	Anthozoa	Scleractinia	Agariciidae	Leptoseris incrustans	4	crust coral	1.6
UVC	UVC_Site_14		2016-03-19	10.3171	-109.217	0_250m	10	Cnidaria	Anthozoa	Scleractinia	Agariciidae	Pavona clavus	9	swollen coral	3.6
UVC	UVC_Site_14		2016-03-19	10.3171	-109.217	0_250m	10	Cnidaria	Anthozoa	Scleractinia	Agariciidae	Pavona varians	14	false brain coral	5.6
UVC	UVC_Site_14		2016-03-19	10.3171	-109.217	0_250m	20	Chordata	Actinopterygii	Perciformes	Serranidae	Paranthias colonus	2.22	Pacific creolefish	NA
UVC	UVC_Site_14		2016-03-19	10.3171	-109.217	0_250m	20	Chordata	Actinopterygii	Perciformes	Acanthuridae	Ctenochaetus marginatus	0.0433333	Stripedfin surgeonfish	NA
UVC	UVC_Site_14		2016-03-19	10.3171	-109.217	0_250m	20	Cnidaria	Anthozoa	Scleractinia	Poritidae	Porites arnaudi	64	Porites arnaudi	25.6
UVC	UVC_Site_14		2016-03-19	10.3171	-109.217	0_250m	10	Cnidaria	Anthozoa	Scleractinia	Poritidae	Porites arnaudi	6	Porites arnaudi	2.4
UVC	UVC_Site_14		2016-03-19	10.3171	-109.217	0_250m	10	Chordata	Actinopterygii	Perciformes	Pomacentridae	Stegastes beebei	0.953333	Galapagos ringtail damselfish	NA
UVC	UVC_Site_14		2016-03-19	10.3171	-109.217	0_250m	10	Chordata	Actinopterygii	Perciformes	Scaridae	Scarus rubroviolaceus	0.0566667	Redlip parrotfish	NA
UVC	UVC_Site_14		2016-03-19	10.3171	-109.217	0_250m	20	Cnidaria	Anthozoa	Scleractinia	Pocilloporidae	Pocillopora verrucosa	1	warty cauliflour coral	0.4
UVC	UVC_Site_14		2016-03-19	10.3171	-109.217	0_250m	20	Chordata	Actinopterygii	Tetraodontiformes	Balistidae	Sufflamen verres	0.00666667	Orangside triggerfish	NA
UVC	UVC_Site_14		2016-03-19	10.3171	-109.217	0_250m	20	Chordata	Actinopterygii	Perciformes	Balistidae	Melichthys niger	0.00333333	Black triggerfish	NA
UVC	UVC_Site_14		2016-03-19	10.3171	-109.217	0_250m	10	Chordata	Actinopterygii	Perciformes	Zanclidae	Zanclus cornutus	0.0466667	Moorish idol	NA
UVC	UVC_Site_14		2016-03-19	10.3171	-109.217	0_250m	10	Chordata	Actinopterygii	Tetraodontiformes	Balistidae	Sufflamen verres	0.01	Orangside triggerfish	NA
UVC	UVC_Site_14		2016-03-19	10.3171	-109.217	0_250m	20	Cnidaria	Anthozoa	Scleractinia	Agariciidae	Pavona varians	95	false brain coral	38
UVC	UVC_Site_14		2016-03-19	10.3171	-109.217	0_250m	20	Chordata	Actinopterygii	Perciformes	Scaridae	Scarus rubroviolaceus	0.01	Redlip parrotfish	NA
UVC	UVC_Site_14		2016-03-19	10.3171	-109.217	0_250m	10	Cnidaria	Anthozoa	Scleractinia	Pocilloporidae	Pocillopora meandrina	1	cauliflour coral	0.4
UVC	UVC_Site_14		2016-03-19	10.3171	-109.217	0_250m	20	Cnidaria	Anthozoa	Scleractinia	Pocilloporidae	Pocillopora meandrina	1	cauliflour coral	0.4
UVC	UVC_Site_14		2016-03-19	10.3171	-109.217	0_250m	10	Chordata	Actinopterygii	Perciformes	Acanthuridae	Ctenochaetus marginatus	0.113333	Stripedfin surgeonfish	NA
UVC	UVC_Site_14		2016-03-19	10.3171	-109.217	0_250m	10	Chordata	Actinopterygii	Tetraodontiformes	Ostraciidae	Ostracion meleagris	0.00666667	White spotted box fish	NA
UVC	UVC_Site_14		2016-03-19	10.3171	-109.217	0_250m	10	Chordata	Actinopterygii	Tetraodontiformes	Tetraodontidae	Arothron meleagris	0.0233333	Golden puffer	NA
UVC	UVC_Site_14		2016-03-19	10.3171	-109.217	0_250m	20	Cnidaria	Anthozoa	Scleractinia	Pocilloporidae	Pocillopora effusus	7	stony cauliflour coral	2.8
UVC	UVC_Site_14		2016-03-19	10.3171	-109.217	0_250m	10	Cnidaria	Anthozoa	Scleractinia	Pocilloporidae	Pocillopora effusus	53	stony cauliflour coral	21.2
UVC	UVC_Site_14		2016-03-19	10.3171	-109.217	0_250m	10	Cnidaria	Anthozoa	Scleractinia	Pocilloporidae	Pocillopora capitata	6	swollen cauliflour coral	2.4
UVC	UVC_Site_14		2016-03-19	10.3171	-109.217	0_250m	20	Chordata	Actinopterygii	Perciformes	Cirrhitidae	Cirrhitus rivulatus	0.00333333	Giant hawkfish	NA
UVC	UVC_Site_14		2016-03-19	10.3171	-109.217	0_250m	20	Chordata	Actinopterygii	Perciformes	Serranidae	Dermatolepis dermatolepis	0.0266667	Leather bass	NA
UVC	UVC_Site_14		2016-03-19	10.3171	-109.217	0_250m	20	Chordata	Actinopterygii	Anguilliformes	Muraenidae	Gymnothorax dovii	0.01	Speckled moray	NA
UVC	UVC_Site_14		2016-03-19	10.3171	-109.217	0_250m	20	Chordata	Actinopterygii	Tetraodontiformes	Tetraodontidae	Arothron meleagris	0.0133333	Golden puffer	NA
UVC	UVC_Site_14		2016-03-19	10.3171	-109.217	0_250m	20	Chordata	Actinopterygii	Perciformes	Pomacentridae	Stegastes beebei	0.00666667	Galapagos ringtail damselfish	NA
UVC	UVC_Site_14		2016-03-19	10.3171	-109.217	0_250m	20	Chordata	Actinopterygii	Perciformes	Zanclidae	Zanclus cornutus	0.02	Moorish idol	NA
UVC	UVC_Site_2		2016-03-13	10.299	-109.233	0_250m	10	Chordata	Actinopterygii	Tetraodontiformes	Balistidae	Sufflamen verres	0.0133333	Orangside triggerfish	NA
UVC	UVC_Site_2		2016-03-13	10.299	-109.233	0_250m	20	Chordata	Actinopterygii	Syngnathiformes	Aulostomidae	Aulostomus chinensis	0.00333333	Chinese trumpetfish	NA
UVC	UVC_Site_2		2016-03-13	10.299	-109.233	0_250m	20	Chordata	Actinopterygii	Perciformes	Acanthuridae	Ctenochaetus marginatus	0.116667	Stripedfin surgeonfish	NA
UVC	UVC_Site_2		2016-03-13	10.299	-109.233	0_250m	10	Chordata	Actinopterygii	Perciformes	Acanthuridae	Acanthurus nigricans	0.0133333	White cheek surgeonfish	NA
UVC	UVC_Site_2		2016-03-13	10.299	-109.233	0_250m	10	Chordata	Actinopterygii	Perciformes	Balistidae	Melichthys niger	0.0366667	Black triggerfish	NA
UVC	UVC_Site_2		2016-03-13	10.299	-109.233	0_250m	20	Chordata	Actinopterygii	Tetraodontiformes	Tetraodontidae	Canthigaster punctatissima	0.02	Spotted sharpmose puffer	NA
UVC	UVC_Site_2		2016-03-13	10.299	-109.233	0_250m	10	Chordata	Actinopterygii	Perciformes	Acanthuridae	Ctenochaetus marginatus	0.0833333	Stripedfin surgeonfish	NA
UVC	UVC_Site_2		2016-03-13	10.299	-109.233	0_250m	10	Chordata	Actinopterygii	Perciformes	Acanthuridae	Acanthurus triostegus	0.00666667	Convict tang	NA
UVC	UVC_Site_2		2016-03-13	10.299	-109.233	0_250m	20	Chordata	Actinopterygii	Perciformes	Acanthuridae	Acanthurus nigricans	0.243333	White cheek surgeonfish	NA
UVC	UVC_Site_2		2016-03-13	10.299	-109.233	0_250m	10	Chordata	Actinopterygii	Anguilliformes	Muraenidae	Gymnothorax dovii	0.00666667	Speckled moray	NA
UVC	UVC_Site_2		2016-03-13	10.299	-109.233	0_250m	20	Chordata	Actinopterygii	Perciformes	Labridae	Thalassoma grammaticum	0.12	Sunset wrasse	NA
UVC	UVC_Site_2		2016-03-13	10.299	-109.233	0_250m	10	Chordata	Actinopterygii	Perciformes	Labridae	Thalassoma grammaticum	0.0533333	Sunset wrasse	NA
UVC	UVC_Site_2		2016-03-13	10.299	-109.233	0_250m	20	Cnidaria	Anthozoa	Scleractinia	Poritidae	Porites australiensis	1	australian porites	0.4
UVC	UVC_Site_2		2016-03-13	10.299	-109.233	0_250m	20	Cnidaria	Anthozoa	Scleractinia	Poritidae	Porites arnaudi	13	Porites arnaudi	5.2
UVC	UVC_Site_2		2016-03-13	10.299	-109.233	0_250m	20	Cnidaria	Anthozoa	Scleractinia	Pocilloporidae	Pocillopora woodjonesi	1	stony coral	0.4
UVC	UVC_Site_2		2016-03-13	10.299	-109.233	0_250m	10	Cnidaria	Anthozoa	Scleractinia	Pocilloporidae	Pocillopora verrucosa	3	warty cauliflour coral	1.2
UVC	UVC_Site_2		2016-03-13	10.299	-109.233	0_250m	20	Cnidaria	Anthozoa	Scleractinia	Pocilloporidae	Pocillopora meandrina	1	cauliflour coral	0.4
UVC	UVC_Site_2		2016-03-13	10.299	-109.233	0_250m	10	Cnidaria	Anthozoa	Scleractinia	Pocilloporidae	Pocillopora meandrina	1	cauliflour coral	0.4
UVC	UVC_Site_2		2016-03-13	10.299	-109.233	0_250m	10	Cnidaria	Anthozoa	Scleractinia	Pocilloporidae	Pocillopora eydouxi	1	antler coral	0.4
UVC	UVC_Site_2		2016-03-13	10.299	-109.233	0_250m	10	Chordata	Actinopterygii	Perciformes	Labridae	Thalassoma robertsoni	3.68	Clipperton rainbow wrasse	NA
UVC	UVC_Site_2		2016-03-13	10.299	-109.233	0_250m	20	Chordata	Actinopterygii	Perciformes	Labridae	Thalassoma robertsoni	2.02667	Clipperton rainbow wrasse	NA
UVC	UVC_Site_2		2016-03-13	10.299	-109.233	0_250m	20	Cnidaria	Anthozoa	Scleractinia	Agariciidae	Pavona clavus	36	swollen coral	14.4
UVC	UVC_Site_2		2016-03-13	10.299	-109.233	0_250m	10	Cnidaria	Anthozoa	Scleractinia	Pocilloporidae	Pocillopora effusus	10	stony cauliflour coral	4
UVC	UVC_Site_2		2016-03-13	10.299	-109.233	0_250m	20	Cnidaria	Anthozoa	Scleractinia	Poritidae	Porites lutea	9	hump coral	3.6
UVC	UVC_Site_2		2016-03-13	10.299	-109.233	0_250m	20	Chordata	Actinopterygii	Anguilliformes	Muraenidae	Gymnothorax dovii	0.0133333	Speckled moray	NA
UVC	UVC_Site_2		2016-03-13	10.299	-109.233	0_250m	20	Cnidaria	Anthozoa	Scleractinia	Agariciidae	Pavona varians	36	false brain coral	14.4
UVC	UVC_Site_2		2016-03-13	10.299	-109.233	0_250m	10	Cnidaria	Anthozoa	Scleractinia	Agariciidae	Pavona minuta	2	leaf coral	0.8
UVC	UVC_Site_2		2016-03-13	10.299	-109.233	0_250m	20	Cnidaria	Anthozoa	Scleractinia	Agariciidae	Pavona maldivensis	5	maldives coral	2
UVC	UVC_Site_2		2016-03-13	10.299	-109.233	0_250m	10	Chordata	Actinopterygii	Perciformes	Mullidae	Mulloidichthys dentatus	0.00333333	Mexican goatfish	NA
UVC	UVC_Site_2		2016-03-13	10.299	-109.233	0_250m	20	Chordata	Actinopterygii	Perciformes	Labridae	Bodianus diplotaenia	0.00666667	Mexican hogfish	NA
UVC	UVC_Site_2		2016-03-13	10.299	-109.233	0_250m	10	Cnidaria	Anthozoa	Scleractinia	Poritidae	Porites lobata	27	lobe coral	10.8
UVC	UVC_Site_2		2016-03-13	10.299	-109.233	0_250m	10	Cnidaria	Anthozoa	Scleractinia	Agariciidae	Pavona clavus	7	swollen coral	2.8
UVC	UVC_Site_2		2016-03-13	10.299	-109.233	0_250m	20	Cnidaria	Anthozoa	Scleractinia	Agariciidae	Leptoseris incrustans	3	crust coral	1.2
UVC	UVC_Site_2		2016-03-13	10.299	-109.233	0_250m	10	Chordata	Actinopterygii	Perciformes	Blenniidae	Ophioblennius steindachneri	0.04	Large banded blenny	NA
UVC	UVC_Site_2		2016-03-13	10.299	-109.233	0_250m	20	Chordata	Actinopterygii	Perciformes	Blenniidae	Ophioblennius steindachneri	0.02	Large banded blenny	NA
UVC	UVC_Site_2		2016-03-13	10.299	-109.233	0_250m	10	Cnidaria	Anthozoa	Scleractinia	Poritidae	Porites lutea	17	hump coral	6.8
UVC	UVC_Site_2		2016-03-13	10.299	-109.233	0_250m	20	Cnidaria	Anthozoa	Scleractinia	Pocilloporidae	Pocillopora effusus	2	stony cauliflour coral	0.8
UVC	UVC_Site_2		2016-03-13	10.299	-109.233	0_250m	20	Chordata	Actinopterygii	Perciformes	Chaetodontidae	Forcipiger flavissimus	0.0133333	Yellow longnose butterfly	NA
UVC	UVC_Site_2		2016-03-13	10.299	-109.233	0_250m	20	Chordata	Actinopterygii	Perciformes	Carangidae	Caranx melampygus	0.0566667	Bluefin trevally	NA
UVC	UVC_Site_2		2016-03-13	10.299	-109.233	0_250m	10	Chordata	Actinopterygii	Perciformes	Serranidae	Paranthias colonus	1.23333	Pacific creolefish	NA
UVC	UVC_Site_2		2016-03-13	10.299	-109.233	0_250m	20	Chordata	Actinopterygii	Perciformes	Carangidae	Elagatis bipinnulata	0.01	Rainbow runner	NA
UVC	UVC_Site_2		2016-03-13	10.299	-109.233	0_250m	20	Chordata	Actinopterygii	Perciformes	Serranidae	Paranthias colonus	3.25667	Pacific creolefish	NA
UVC	UVC_Site_2		2016-03-13	10.299	-109.233	0_250m	10	Chordata	Actinopterygii	Perciformes	Kyphosidae	Kyphosus elegans	0.0233333	Cortez sea chub	NA
UVC	UVC_Site_2		2016-03-13	10.299	-109.233	0_250m	20	Chordata	Actinopterygii	Perciformes	Pomacanthidae	Holacanthus clarionensis	0.02	Clarion angelfish	NA
UVC	UVC_Site_2		2016-03-13	10.299	-109.233	0_250m	20	Chordata	Actinopterygii	Perciformes	Balistidae	Melichthys niger	0.0866667	Black triggerfish	NA
UVC	UVC_Site_2		2016-03-13	10.299	-109.233	0_250m	10	Chordata	Actinopterygii	Perciformes	Carangidae	Caranx melampygus	0.0766667	Bluefin trevally	NA
UVC	UVC_Site_2		2016-03-13	10.299	-109.233	0_250m	20	Chordata	Actinopterygii	Perciformes	Kyphosidae	Kyphosus analogus	0.113333	Blue-bronze sea chub	NA
UVC	UVC_Site_2		2016-03-13	10.299	-109.233	0_250m	10	Chordata	Actinopterygii	Tetraodontiformes	Monacanthidae	Cantherhines dumerilii	0.00333333	Barred filefish	NA
UVC	UVC_Site_2		2016-03-13	10.299	-109.233	0_250m	10	Chordata	Actinopterygii	Perciformes	Pomacanthidae	Holacanthus clarionensis	0.0133333	Clarion angelfish	NA
UVC	UVC_Site_2		2016-03-13	10.299	-109.233	0_250m	20	Chordata	Actinopterygii	Perciformes	Cirrhitidae	Cirrhitus rivulatus	0.00333333	Giant hawkfish	NA
UVC	UVC_Site_2		2016-03-13	10.299	-109.233	0_250m	10	Chordata	Actinopterygii	Perciformes	Cirrhitidae	Cirrhitus rivulatus	0.00666667	Giant hawkfish	NA
UVC	UVC_Site_2		2016-03-13	10.299	-109.233	0_250m	20	Chordata	Actinopterygii	Perciformes	Serranidae	Dermatolepis dermatolepis	0.01	Leather bass	NA
UVC	UVC_Site_2		2016-03-13	10.299	-109.233	0_250m	10	Chordata	Actinopterygii	Perciformes	Serranidae	Dermatolepis dermatolepis	0.0733333	Leather bass	NA
UVC	UVC_Site_2		2016-03-13	10.299	-109.233	0_250m	10	Chordata	Actinopterygii	Perciformes	Carangidae	Elagatis bipinnulata	0.00666667	Rainbow runner	NA
UVC	UVC_Site_2		2016-03-13	10.299	-109.233	0_250m	20	Chordata	Actinopterygii	Perciformes	Zanclidae	Zanclus cornutus	0.0266667	Moorish idol	NA
UVC	UVC_Site_2		2016-03-13	10.299	-109.233	0_250m	10	Chordata	Actinopterygii	Perciformes	Cirrhitidae	Cirrhitichthys oxycephalus	0.173333	Coral hawkfish	NA
UVC	UVC_Site_2		2016-03-13	10.299	-109.233	0_250m	10	Chordata	Actinopterygii	Perciformes	Pomacentridae	Stegastes beebei	2.08	Galapagos ringtail damselfish	NA
UVC	UVC_Site_2		2016-03-13	10.299	-109.233	0_250m	20	Chordata	Actinopterygii	Perciformes	Pomacentridae	Stegastes beebei	0.126667	Galapagos ringtail damselfish	NA
UVC	UVC_Site_2		2016-03-13	10.299	-109.233	0_250m	10	Chordata	Actinopterygii	Perciformes	Serranidae	Epinephelus labriformis	0.0266667	Starry grouper	NA
UVC	UVC_Site_2		2016-03-13	10.299	-109.233	0_250m	20	Chordata	Actinopterygii	Perciformes	Serranidae	Epinephelus labriformis	0.106667	Starry grouper	NA
UVC	UVC_Site_2		2016-03-13	10.299	-109.233	0_250m	20	Chordata	Actinopterygii	Perciformes	Serranidae	Epinephelus clippertonensis	0.02	Clipperton grouper	NA
UVC	UVC_Site_2		2016-03-13	10.299	-109.233	0_250m	20	Chordata	Actinopterygii	Perciformes	Chaetodontidae	Johnrandallia nigrirostris	0.0466667	Blacknosed butterflyfish	NA
UVC	UVC_Site_2		2016-03-13	10.299	-109.233	0_250m	20	Chordata	Actinopterygii	Perciformes	Cirrhitidae	Cirrhitichthys oxycephalus	0.02	Coral hawkfish	NA
UVC	UVC_Site_2		2016-03-13	10.299	-109.233	0_250m	20	Chordata	Actinopterygii	Perciformes	Kyphosidae	Kyphosus elegans	0.0933333	Cortez sea chub	NA
UVC	UVC_Site_2		2016-03-13	10.299	-109.233	0_250m	20	Cnidaria	Anthozoa	Scleractinia	Poritidae	Porites lobata	41	lobe coral	16.4
UVC	UVC_Site_2		2016-03-13	10.299	-109.233	0_250m	10	Chordata	Actinopterygii	Perciformes	Kyphosidae	Kyphosus analogus	0.00666667	Blue-bronze sea chub	NA
UVC	UVC_Site_2		2016-03-13	10.299	-109.233	0_250m	10	Chordata	Actinopterygii	Perciformes	Scaridae	Scarus rubroviolaceus	0.00333333	Redlip parrotfish	NA
UVC	UVC_Site_3		2016-03-14	10.3071	-109.238	0_250m	20	Cnidaria	Anthozoa	Scleractinia	Agariciidae	Pavona maldivensis	4	maldives coral	1.6
UVC	UVC_Site_3		2016-03-14	10.3071	-109.238	0_250m	20	Chordata	Actinopterygii	Perciformes	Serranidae	Dermatolepis dermatolepis	0.01	Leather bass	NA
UVC	UVC_Site_3		2016-03-14	10.3071	-109.238	0_250m	10	Chordata	Actinopterygii	Anguilliformes	Muraenidae	Gymnothorax dovii	0.00333333	Speckled moray	NA
UVC	UVC_Site_3		2016-03-14	10.3071	-109.238	0_250m	20	Chordata	Actinopterygii	Perciformes	Cirrhitidae	Cirrhitichthys oxycephalus	0.0266667	Coral hawkfish	NA
UVC	UVC_Site_3		2016-03-14	10.3071	-109.238	0_250m	20	Cnidaria	Anthozoa	Scleractinia	Agariciidae	Pavona varians	14	false brain coral	5.6
UVC	UVC_Site_3		2016-03-14	10.3071	-109.238	0_250m	20	Chordata	Actinopterygii	Anguilliformes	Muraenidae	Gymnothorax dovii	0.00666667	Speckled moray	NA
UVC	UVC_Site_3		2016-03-14	10.3071	-109.238	0_250m	20	Chordata	Actinopterygii	Perciformes	Labridae	Bodianus diplotaenia	0.0166667	Mexican hogfish	NA
UVC	UVC_Site_3		2016-03-14	10.3071	-109.238	0_250m	10	Chordata	Actinopterygii	Perciformes	Serranidae	Dermatolepis dermatolepis	0.0333333	Leather bass	NA
UVC	UVC_Site_3		2016-03-14	10.3071	-109.238	0_250m	10	Chordata	Actinopterygii	Perciformes	Cirrhitidae	Cirrhitichthys oxycephalus	0.166667	Coral hawkfish	NA
UVC	UVC_Site_3		2016-03-14	10.3071	-109.238	0_250m	10	Chordata	Actinopterygii	Perciformes	Serranidae	Epinephelus clippertonensis	0.00333333	Clipperton grouper	NA
UVC	UVC_Site_3		2016-03-14	10.3071	-109.238	0_250m	20	Chordata	Actinopterygii	Beryciformes	Holocentridae	Myripristis berndti	0.00333333	Blotcheye soldierfish	NA
UVC	UVC_Site_3		2016-03-14	10.3071	-109.238	0_250m	10	Cnidaria	Anthozoa	Scleractinia	Pocilloporidae	Pocillopora meandrina	2	cauliflour coral	0.8
UVC	UVC_Site_3		2016-03-14	10.3071	-109.238	0_250m	20	Chordata	Actinopterygii	Perciformes	Labridae	Thalassoma grammaticum	0.06	Sunset wrasse	NA
UVC	UVC_Site_3		2016-03-14	10.3071	-109.238	0_250m	10	Chordata	Actinopterygii	Perciformes	Labridae	Thalassoma grammaticum	0.06	Sunset wrasse	NA
UVC	UVC_Site_3		2016-03-14	10.3071	-109.238	0_250m	10	Chordata	Actinopterygii	Perciformes	Pomacentridae	Stegastes beebei	0.94	Galapagos ringtail damselfish	NA
UVC	UVC_Site_3		2016-03-14	10.3071	-109.238	0_250m	20	Cnidaria	Anthozoa	Scleractinia	Poritidae	Porites arnaudi	28	Porites arnaudi	11.2
UVC	UVC_Site_3		2016-03-14	10.3071	-109.238	0_250m	20	Chordata	Actinopterygii	Perciformes	Pomacentridae	Stegastes beebei	0.526667	Galapagos ringtail damselfish	NA
UVC	UVC_Site_3		2016-03-14	10.3071	-109.238	0_250m	10	Chordata	Actinopterygii	Perciformes	Scaridae	Scarus rubroviolaceus	0.0233333	Redlip parrotfish	NA
UVC	UVC_Site_3		2016-03-14	10.3071	-109.238	0_250m	10	Cnidaria	Anthozoa	Scleractinia	Pocilloporidae	Pocillopora woodjonesi	3	stony coral	1.2
UVC	UVC_Site_3		2016-03-14	10.3071	-109.238	0_250m	20	Cnidaria	Anthozoa	Scleractinia	Poritidae	Porites lobata	27	lobe coral	10.8
UVC	UVC_Site_3		2016-03-14	10.3071	-109.238	0_250m	20	Chordata	Actinopterygii	Perciformes	Labridae	Thalassoma robertsoni	2.84667	Clipperton rainbow wrasse	NA
UVC	UVC_Site_3		2016-03-14	10.3071	-109.238	0_250m	20	Cnidaria	Anthozoa	Scleractinia	Pocilloporidae	Pocillopora verrucosa	2	warty cauliflour coral	0.8
UVC	UVC_Site_3		2016-03-14	10.3071	-109.238	0_250m	20	Cnidaria	Anthozoa	Scleractinia	Dendrophylliidae	Tubastraea coccinea	1	orange cup coral	0.4
UVC	UVC_Site_3		2016-03-14	10.3071	-109.238	0_250m	20	Chordata	Actinopterygii	Perciformes	Kyphosidae	Kyphosus analogus	0.00666667	Blue-bronze sea chub	NA
UVC	UVC_Site_3		2016-03-14	10.3071	-109.238	0_250m	20	Cnidaria	Anthozoa	Scleractinia	Pocilloporidae	Pocillopora eydouxi	2	antler coral	0.8
UVC	UVC_Site_3		2016-03-14	10.3071	-109.238	0_250m	10	Cnidaria	Anthozoa	Scleractinia	Pocilloporidae	Pocillopora eydouxi	2	antler coral	0.8
UVC	UVC_Site_3		2016-03-14	10.3071	-109.238	0_250m	20	Chordata	Actinopterygii	Perciformes	Pomacanthidae	Holacanthus clarionensis	0.06	Clarion angelfish	NA
UVC	UVC_Site_3		2016-03-14	10.3071	-109.238	0_250m	20	Cnidaria	Anthozoa	Scleractinia	Pocilloporidae	Pocillopora effusus	1	stony cauliflour coral	0.4
UVC	UVC_Site_3		2016-03-14	10.3071	-109.238	0_250m	10	Cnidaria	Anthozoa	Scleractinia	Pocilloporidae	Pocillopora effusus	17	stony cauliflour coral	6.8
UVC	UVC_Site_3		2016-03-14	10.3071	-109.238	0_250m	10	Chordata	Actinopterygii	Perciformes	Pomacanthidae	Holacanthus clarionensis	0.0433333	Clarion angelfish	NA
UVC	UVC_Site_3		2016-03-14	10.3071	-109.238	0_250m	10	Chordata	Actinopterygii	Perciformes	Labridae	Thalassoma robertsoni	2.91333	Clipperton rainbow wrasse	NA
UVC	UVC_Site_3		2016-03-14	10.3071	-109.238	0_250m	10	Chordata	Actinopterygii	Perciformes	Cirrhitidae	Cirrhitus rivulatus	0.00666667	Giant hawkfish	NA
UVC	UVC_Site_3		2016-03-14	10.3071	-109.238	0_250m	20	Chordata	Actinopterygii	Perciformes	Labridae	Thalassoma purpureum	0.0133333	Surge wrasse	NA
UVC	UVC_Site_3		2016-03-14	10.3071	-109.238	0_250m	10	Chordata	Actinopterygii	Perciformes	Acanthuridae	Ctenochaetus marginatus	0.103333	Stripedfin surgeonfish	NA
UVC	UVC_Site_3		2016-03-14	10.3071	-109.238	0_250m	20	Chordata	Actinopterygii	Perciformes	Acanthuridae	Acanthurus nigricans	0.113333	White cheek surgeonfish	NA
UVC	UVC_Site_3		2016-03-14	10.3071	-109.238	0_250m	20	Chordata	Actinopterygii	Perciformes	Kyphosidae	Kyphosus elegans	0.01	Cortez sea chub	NA
UVC	UVC_Site_3		2016-03-14	10.3071	-109.238	0_250m	10	Chordata	Actinopterygii	Perciformes	Balistidae	Melichthys niger	0.16	Black triggerfish	NA
UVC	UVC_Site_3		2016-03-14	10.3071	-109.238	0_250m	20	Chordata	Actinopterygii	Perciformes	Carangidae	Caranx melampygus	0.03	Bluefin trevally	NA
UVC	UVC_Site_3		2016-03-14	10.3071	-109.238	0_250m	10	Chordata	Actinopterygii	Perciformes	Carangidae	Caranx melampygus	0.0533333	Bluefin trevally	NA
UVC	UVC_Site_3		2016-03-14	10.3071	-109.238	0_250m	10	Chordata	Actinopterygii	Perciformes	Acanthuridae	Acanthurus nigricans	0.0533333	White cheek surgeonfish	NA
UVC	UVC_Site_3		2016-03-14	10.3071	-109.238	0_250m	20	Chordata	Actinopterygii	Perciformes	Serranidae	Epinephelus clippertonensis	0.00333333	Clipperton grouper	NA
UVC	UVC_Site_3		2016-03-14	10.3071	-109.238	0_250m	20	Cnidaria	Anthozoa	Scleractinia	Poritidae	Porites lutea	12	hump coral	4.8
UVC	UVC_Site_3		2016-03-14	10.3071	-109.238	0_250m	20	Cnidaria	Anthozoa	Scleractinia	Agariciidae	Pavona clavus	2	swollen coral	0.8
UVC	UVC_Site_3		2016-03-14	10.3071	-109.238	0_250m	20	Chordata	Actinopterygii	Perciformes	Carangidae	Elagatis bipinnulata	0.00666667	Rainbow runner	NA
UVC	UVC_Site_3		2016-03-14	10.3071	-109.238	0_250m	20	Chordata	Actinopterygii	Tetraodontiformes	Tetraodontidae	Arothron meleagris	0.02	Golden puffer	NA
UVC	UVC_Site_3		2016-03-14	10.3071	-109.238	0_250m	10	Chordata	Actinopterygii	Tetraodontiformes	Tetraodontidae	Arothron meleagris	0.00666667	Golden puffer	NA
UVC	UVC_Site_3		2016-03-14	10.3071	-109.238	0_250m	20	Chordata	Actinopterygii	Perciformes	Zanclidae	Zanclus cornutus	0.02	Moorish idol	NA
UVC	UVC_Site_3		2016-03-14	10.3071	-109.238	0_250m	20	Chordata	Actinopterygii	Tetraodontiformes	Ostraciidae	Ostracion meleagris	0.00666667	White spotted box fish	NA
UVC	UVC_Site_3		2016-03-14	10.3071	-109.238	0_250m	10	Chordata	Actinopterygii	Tetraodontiformes	Monacanthidae	Cantherhines dumerilii	0.00333333	Barred filefish	NA
UVC	UVC_Site_3		2016-03-14	10.3071	-109.238	0_250m	20	Chordata	Actinopterygii	Tetraodontiformes	Monacanthidae	Cantherhines dumerilii	0.00666667	Barred filefish	NA
UVC	UVC_Site_3		2016-03-14	10.3071	-109.238	0_250m	20	Chordata	Actinopterygii	Perciformes	Balistidae	Melichthys niger	0.166667	Black triggerfish	NA
UVC	UVC_Site_3		2016-03-14	10.3071	-109.238	0_250m	20	Chordata	Actinopterygii	Perciformes	Acanthuridae	Ctenochaetus marginatus	0.0733333	Stripedfin surgeonfish	NA
UVC	UVC_Site_3		2016-03-14	10.3071	-109.238	0_250m	20	Chordata	Actinopterygii	Perciformes	Chaetodontidae	Johnrandallia nigrirostris	0.0666667	Blacknosed butterflyfish	NA
UVC	UVC_Site_3		2016-03-14	10.3071	-109.238	0_250m	10	Chordata	Actinopterygii	Perciformes	Labridae	Bodianus diplotaenia	0.00333333	Mexican hogfish	NA
UVC	UVC_Site_3		2016-03-14	10.3071	-109.238	0_250m	20	Chordata	Actinopterygii	Perciformes	Kyphosidae	Sectator ocyurus	0.00333333	Bluestriped chub	NA
UVC	UVC_Site_3		2016-03-14	10.3071	-109.238	0_250m	10	Cnidaria	Anthozoa	Scleractinia	Agariciidae	Pavona clavus	5	swollen coral	2
UVC	UVC_Site_3		2016-03-14	10.3071	-109.238	0_250m	20	Chordata	Actinopterygii	Syngnathiformes	Aulostomidae	Aulostomus chinensis	0.00333333	Chinese trumpetfish	NA
UVC	UVC_Site_3		2016-03-14	10.3071	-109.238	0_250m	10	Chordata	Actinopterygii	Perciformes	Serranidae	Epinephelus labriformis	0.0133333	Starry grouper	NA
UVC	UVC_Site_3		2016-03-14	10.3071	-109.238	0_250m	20	Chordata	Actinopterygii	Perciformes	Serranidae	Epinephelus labriformis	0.0933333	Starry grouper	NA
UVC	UVC_Site_3		2016-03-14	10.3071	-109.238	0_250m	10	Chordata	Actinopterygii	Tetraodontiformes	Balistidae	Sufflamen verres	0.0133333	Orangside triggerfish	NA
UVC	UVC_Site_3		2016-03-14	10.3071	-109.238	0_250m	20	Cnidaria	Anthozoa	Scleractinia	Agariciidae	Leptoseris incrustans	2	crust coral	0.8
UVC	UVC_Site_3		2016-03-14	10.3071	-109.238	0_250m	10	Cnidaria	Anthozoa	Scleractinia	Poritidae	Porites lutea	8	hump coral	3.2
UVC	UVC_Site_3		2016-03-14	10.3071	-109.238	0_250m	20	Chordata	Actinopterygii	Perciformes	Carangidae	Caranx lugubris	0.0133333	Black jack	NA
UVC	UVC_Site_3		2016-03-14	10.3071	-109.238	0_250m	10	Cnidaria	Anthozoa	Scleractinia	Poritidae	Porites lobata	69	lobe coral	27.6
UVC	UVC_Site_3		2016-03-14	10.3071	-109.238	0_250m	10	Chordata	Actinopterygii	Perciformes	Blenniidae	Ophioblennius steindachneri	0.0466667	Large banded blenny	NA
UVC	UVC_Site_3		2016-03-14	10.3071	-109.238	0_250m	10	Chordata	Actinopterygii	Perciformes	Serranidae	Paranthias colonus	1.16	Pacific creolefish	NA
UVC	UVC_Site_3		2016-03-14	10.3071	-109.238	0_250m	10	Chordata	Actinopterygii	Perciformes	Carangidae	Caranx lugubris	0.00333333	Black jack	NA
UVC	UVC_Site_3		2016-03-14	10.3071	-109.238	0_250m	20	Chordata	Actinopterygii	Perciformes	Serranidae	Paranthias colonus	2.64	Pacific creolefish	NA
UVC	UVC_Site_4		2016-03-14	10.3211	-109.229	0_250m	10	Chordata	Actinopterygii	Perciformes	Acanthuridae	Ctenochaetus marginatus	0.0533333	Stripedfin surgeonfish	NA
UVC	UVC_Site_4		2016-03-14	10.3211	-109.229	0_250m	20	Chordata	Actinopterygii	Perciformes	Acanthuridae	Ctenochaetus marginatus	0.0666667	Stripedfin surgeonfish	NA
UVC	UVC_Site_4		2016-03-14	10.3211	-109.229	0_250m	10	Chordata	Actinopterygii	Perciformes	Labridae	Thalassoma grammaticum	0.0866667	Sunset wrasse	NA
UVC	UVC_Site_4		2016-03-14	10.3211	-109.229	0_250m	20	Chordata	Actinopterygii	Perciformes	Cirrhitidae	Cirrhitus rivulatus	0.00333333	Giant hawkfish	NA
UVC	UVC_Site_4		2016-03-14	10.3211	-109.229	0_250m	10	Chordata	Actinopterygii	Perciformes	Kyphosidae	Kyphosus elegans	0.00333333	Cortez sea chub	NA
UVC	UVC_Site_4		2016-03-14	10.3211	-109.229	0_250m	20	Chordata	Actinopterygii	Perciformes	Pomacentridae	Stegastes beebei	0.273333	Galapagos ringtail damselfish	NA
UVC	UVC_Site_4		2016-03-14	10.3211	-109.229	0_250m	20	Chordata	Actinopterygii	Perciformes	Kyphosidae	Kyphosus elegans	0.136667	Cortez sea chub	NA
UVC	UVC_Site_4		2016-03-14	10.3211	-109.229	0_250m	10	Chordata	Actinopterygii	Perciformes	Carangidae	Caranx melampygus	0.0333333	Bluefin trevally	NA
UVC	UVC_Site_4		2016-03-14	10.3211	-109.229	0_250m	20	Chordata	Actinopterygii	Beryciformes	Holocentridae	Myripristis berndti	0.01	Blotcheye soldierfish	NA
UVC	UVC_Site_4		2016-03-14	10.3211	-109.229	0_250m	20	Chordata	Actinopterygii	Perciformes	Labridae	Bodianus diplotaenia	0.00333333	Mexican hogfish	NA
UVC	UVC_Site_4		2016-03-14	10.3211	-109.229	0_250m	20	Chordata	Actinopterygii	Perciformes	Chaetodontidae	Johnrandallia nigrirostris	0.0266667	Blacknosed butterflyfish	NA
UVC	UVC_Site_4		2016-03-14	10.3211	-109.229	0_250m	20	Chordata	Actinopterygii	Anguilliformes	Muraenidae	Gymnothorax flavimarginatus	0.0266667	Yellow edged moray	NA
UVC	UVC_Site_4		2016-03-14	10.3211	-109.229	0_250m	10	Chordata	Actinopterygii	Perciformes	Cirrhitidae	Cirrhitichthys oxycephalus	0.14	Coral hawkfish	NA
UVC	UVC_Site_4		2016-03-14	10.3211	-109.229	0_250m	20	Chordata	Actinopterygii	Perciformes	Cirrhitidae	Cirrhitichthys oxycephalus	0.186667	Coral hawkfish	NA
UVC	UVC_Site_4		2016-03-14	10.3211	-109.229	0_250m	20	Chordata	Actinopterygii	Perciformes	Acanthuridae	Acanthurus nigricans	0.0833333	White cheek surgeonfish	NA
UVC	UVC_Site_4		2016-03-14	10.3211	-109.229	0_250m	20	Chordata	Actinopterygii	Perciformes	Carangidae	Caranx melampygus	0.0533333	Bluefin trevally	NA
UVC	UVC_Site_4		2016-03-14	10.3211	-109.229	0_250m	10	Chordata	Actinopterygii	Perciformes	Kyphosidae	Kyphosus analogus	0.00666667	Blue-bronze sea chub	NA
UVC	UVC_Site_4		2016-03-14	10.3211	-109.229	0_250m	10	Chordata	Actinopterygii	Perciformes	Cirrhitidae	Cirrhitus rivulatus	0.00333333	Giant hawkfish	NA
UVC	UVC_Site_4		2016-03-14	10.3211	-109.229	0_250m	10	Chordata	Actinopterygii	Perciformes	Acanthuridae	Acanthurus nigricans	0.156667	White cheek surgeonfish	NA
UVC	UVC_Site_4		2016-03-14	10.3211	-109.229	0_250m	10	Chordata	Actinopterygii	Perciformes	Acanthuridae	Acanthurus triostegus	0.133333	Convict tang	NA
UVC	UVC_Site_4		2016-03-14	10.3211	-109.229	0_250m	20	Chordata	Actinopterygii	Perciformes	Balistidae	Melichthys niger	0.183333	Black triggerfish	NA
UVC	UVC_Site_4		2016-03-14	10.3211	-109.229	0_250m	10	Chordata	Actinopterygii	Perciformes	Balistidae	Melichthys niger	0.01	Black triggerfish	NA
UVC	UVC_Site_4		2016-03-14	10.3211	-109.229	0_250m	20	Chordata	Actinopterygii	Perciformes	Kyphosidae	Kyphosus analogus	0.01	Blue-bronze sea chub	NA
UVC	UVC_Site_4		2016-03-14	10.3211	-109.229	0_250m	10	Chordata	Actinopterygii	Perciformes	Labridae	Stethojulis bandanensis	0.00666667	Red shoulder wrasse	NA
UVC	UVC_Site_4		2016-03-14	10.3211	-109.229	0_250m	20	Cnidaria	Anthozoa	Scleractinia	Pocilloporidae	Pocillopora effusus	9	stony cauliflour coral	3.6
UVC	UVC_Site_4		2016-03-14	10.3211	-109.229	0_250m	20	Chordata	Actinopterygii	Tetraodontiformes	Tetraodontidae	Arothron meleagris	0.02	Golden puffer	NA
UVC	UVC_Site_4		2016-03-14	10.3211	-109.229	0_250m	10	Chordata	Actinopterygii	Perciformes	Pomacanthidae	Holacanthus clarionensis	0.0266667	Clarion angelfish	NA
UVC	UVC_Site_4		2016-03-14	10.3211	-109.229	0_250m	10	Chordata	Actinopterygii	Tetraodontiformes	Tetraodontidae	Canthigaster punctatissima	0.0133333	Spotted sharpmose puffer	NA
UVC	UVC_Site_4		2016-03-14	10.3211	-109.229	0_250m	10	Chordata	Actinopterygii	Perciformes	Zanclidae	Zanclus cornutus	0.02	Moorish idol	NA
UVC	UVC_Site_4		2016-03-14	10.3211	-109.229	0_250m	20	Cnidaria	Anthozoa	Scleractinia	Poritidae	Porites lutea	18	hump coral	7.2
UVC	UVC_Site_4		2016-03-14	10.3211	-109.229	0_250m	20	Chordata	Actinopterygii	Perciformes	Zanclidae	Zanclus cornutus	0.0533333	Moorish idol	NA
UVC	UVC_Site_4		2016-03-14	10.3211	-109.229	0_250m	20	Chordata	Actinopterygii	Perciformes	Carangidae	Elagatis bipinnulata	0.00333333	Rainbow runner	NA
UVC	UVC_Site_4		2016-03-14	10.3211	-109.229	0_250m	20	Cnidaria	Anthozoa	Scleractinia	Agariciidae	Pavona varians	18	false brain coral	7.2
UVC	UVC_Site_4		2016-03-14	10.3211	-109.229	0_250m	10	Cnidaria	Anthozoa	Scleractinia	Pocilloporidae	Pocillopora effusus	31	stony cauliflour coral	12.4
UVC	UVC_Site_4		2016-03-14	10.3211	-109.229	0_250m	10	Cnidaria	Anthozoa	Scleractinia	Agariciidae	Pavona varians	3	false brain coral	1.2
UVC	UVC_Site_4		2016-03-14	10.3211	-109.229	0_250m	20	Chordata	Actinopterygii	Perciformes	Labridae	Thalassoma grammaticum	0.04	Sunset wrasse	NA
UVC	UVC_Site_4		2016-03-14	10.3211	-109.229	0_250m	20	Chordata	Actinopterygii	Perciformes	Carangidae	Caranx lugubris	0.0166667	Black jack	NA
UVC	UVC_Site_4		2016-03-14	10.3211	-109.229	0_250m	10	Chordata	Actinopterygii	Perciformes	Carangidae	Caranx lugubris	0.00666667	Black jack	NA
UVC	UVC_Site_4		2016-03-14	10.3211	-109.229	0_250m	10	Cnidaria	Anthozoa	Scleractinia	Pocilloporidae	Pocillopora eydouxi	2	antler coral	0.8
UVC	UVC_Site_4		2016-03-14	10.3211	-109.229	0_250m	10	Chordata	Actinopterygii	Perciformes	Blenniidae	Ophioblennius steindachneri	0.04	Large banded blenny	NA
UVC	UVC_Site_4		2016-03-14	10.3211	-109.229	0_250m	20	Cnidaria	Anthozoa	Scleractinia	Pocilloporidae	Pocillopora eydouxi	1	antler coral	0.4
UVC	UVC_Site_4		2016-03-14	10.3211	-109.229	0_250m	10	Chordata	Actinopterygii	Perciformes	Mullidae	Mulloidichthys dentatus	0.00333333	Mexican goatfish	NA
UVC	UVC_Site_4		2016-03-14	10.3211	-109.229	0_250m	10	Cnidaria	Anthozoa	Scleractinia	Pocilloporidae	Pocillopora capitata	3	swollen cauliflour coral	1.2
UVC	UVC_Site_4		2016-03-14	10.3211	-109.229	0_250m	20	Cnidaria	Anthozoa	Scleractinia	Agariciidae	Pavona maldivensis	1	maldives coral	0.4
UVC	UVC_Site_4		2016-03-14	10.3211	-109.229	0_250m	20	Chordata	Actinopterygii	Perciformes	Serranidae	Epinephelus labriformis	0.0866667	Starry grouper	NA
UVC	UVC_Site_4		2016-03-14	10.3211	-109.229	0_250m	10	Chordata	Actinopterygii	Perciformes	Serranidae	Epinephelus labriformis	0.0466667	Starry grouper	NA
UVC	UVC_Site_4		2016-03-14	10.3211	-109.229	0_250m	10	Cnidaria	Anthozoa	Scleractinia	Poritidae	Porites lutea	1	hump coral	0.4
UVC	UVC_Site_4		2016-03-14	10.3211	-109.229	0_250m	10	Chordata	Actinopterygii	Perciformes	Serranidae	Epinephelus clippertonensis	0.01	Clipperton grouper	NA
UVC	UVC_Site_4		2016-03-14	10.3211	-109.229	0_250m	10	Cnidaria	Anthozoa	Scleractinia	Agariciidae	Pavona clavus	1	swollen coral	0.4
UVC	UVC_Site_4		2016-03-14	10.3211	-109.229	0_250m	20	Cnidaria	Anthozoa	Scleractinia	Agariciidae	Pavona clavus	6	swollen coral	2.4
UVC	UVC_Site_4		2016-03-14	10.3211	-109.229	0_250m	20	Chordata	Actinopterygii	Perciformes	Serranidae	Dermatolepis dermatolepis	0.0133333	Leather bass	NA
UVC	UVC_Site_4		2016-03-14	10.3211	-109.229	0_250m	20	Chordata	Actinopterygii	Perciformes	Pomacanthidae	Holacanthus clarionensis	0.02	Clarion angelfish	NA
UVC	UVC_Site_4		2016-03-14	10.3211	-109.229	0_250m	10	Cnidaria	Anthozoa	Scleractinia	Agariciidae	Pavona maldivensis	1	maldives coral	0.4
UVC	UVC_Site_4		2016-03-14	10.3211	-109.229	0_250m	20	Chordata	Actinopterygii	Perciformes	Chaetodontidae	Forcipiger flavissimus	0.02	Yellow longnose butterfly	NA
UVC	UVC_Site_4		2016-03-14	10.3211	-109.229	0_250m	20	Chordata	Chondrichthyes	Carcharhiniformes	Carcharhinidae	Carcharhinus albimarginatus	0.00333333	Silvertip shark	NA
UVC	UVC_Site_4		2016-03-14	10.3211	-109.229	0_250m	10	Chordata	Actinopterygii	Perciformes	Serranidae	Paranthias colonus	1.43333	Pacific creolefish	NA
UVC	UVC_Site_4		2016-03-14	10.3211	-109.229	0_250m	20	Chordata	Actinopterygii	Perciformes	Serranidae	Paranthias colonus	3.02333	Pacific creolefish	NA
UVC	UVC_Site_4		2016-03-14	10.3211	-109.229	0_250m	20	Chordata	Actinopterygii	Perciformes	Scaridae	Scarus rubroviolaceus	0.01	Redlip parrotfish	NA
UVC	UVC_Site_4		2016-03-14	10.3211	-109.229	0_250m	10	Chordata	Actinopterygii	Perciformes	Scaridae	Scarus rubroviolaceus	0.0133333	Redlip parrotfish	NA
UVC	UVC_Site_4		2016-03-14	10.3211	-109.229	0_250m	20	Chordata	Actinopterygii	Tetraodontiformes	Tetraodontidae	Canthigaster punctatissima	0.00666667	Spotted sharpmose puffer	NA
UVC	UVC_Site_4		2016-03-14	10.3211	-109.229	0_250m	10	Chordata	Actinopterygii	Perciformes	Pomacentridae	Stegastes beebei	1.04667	Galapagos ringtail damselfish	NA
UVC	UVC_Site_4		2016-03-14	10.3211	-109.229	0_250m	10	Chordata	Actinopterygii	Perciformes	Serranidae	Dermatolepis dermatolepis	0.0166667	Leather bass	NA
UVC	UVC_Site_4		2016-03-14	10.3211	-109.229	0_250m	20	Cnidaria	Anthozoa	Scleractinia	Pocilloporidae	Pocillopora verrucosa	1	warty cauliflour coral	0.4
UVC	UVC_Site_4		2016-03-14	10.3211	-109.229	0_250m	10	Cnidaria	Anthozoa	Scleractinia	Poritidae	Porites lobata	23	lobe coral	9.2
UVC	UVC_Site_4		2016-03-14	10.3211	-109.229	0_250m	20	Cnidaria	Anthozoa	Scleractinia	Poritidae	Porites lobata	34	lobe coral	13.6
UVC	UVC_Site_4		2016-03-14	10.3211	-109.229	0_250m	10	Chordata	Actinopterygii	Tetraodontiformes	Tetraodontidae	Arothron meleagris	0.0266667	Golden puffer	NA
UVC	UVC_Site_4		2016-03-14	10.3211	-109.229	0_250m	10	Chordata	Actinopterygii	Tetraodontiformes	Balistidae	Sufflamen verres	0.0133333	Orangside triggerfish	NA
UVC	UVC_Site_4		2016-03-14	10.3211	-109.229	0_250m	20	Chordata	Actinopterygii	Tetraodontiformes	Monacanthidae	Cantherhines dumerilii	0.00333333	Barred filefish	NA
UVC	UVC_Site_4		2016-03-14	10.3211	-109.229	0_250m	20	Cnidaria	Anthozoa	Scleractinia	Poritidae	Porites arnaudi	146	Porites arnaudi	58.4
UVC	UVC_Site_4		2016-03-14	10.3211	-109.229	0_250m	10	Cnidaria	Anthozoa	Scleractinia	Poritidae	Porites arnaudi	4	Porites arnaudi	1.6
UVC	UVC_Site_4		2016-03-14	10.3211	-109.229	0_250m	20	Chordata	Actinopterygii	Perciformes	Labridae	Thalassoma robertsoni	2.12	Clipperton rainbow wrasse	NA
UVC	UVC_Site_4		2016-03-14	10.3211	-109.229	0_250m	10	Chordata	Actinopterygii	Perciformes	Labridae	Thalassoma robertsoni	3.58	Clipperton rainbow wrasse	NA
UVC	UVC_Site_4		2016-03-14	10.3211	-109.229	0_250m	10	Chordata	Actinopterygii	Perciformes	Labridae	Thalassoma purpureum	0.00666667	Surge wrasse	NA
UVC	UVC_Site_4		2016-03-14	10.3211	-109.229	0_250m	10	Cnidaria	Anthozoa	Scleractinia	Pocilloporidae	Pocillopora woodjonesi	1	stony coral	0.4
UVC	UVC_Site_4		2016-03-14	10.3211	-109.229	0_250m	10	Cnidaria	Anthozoa	Scleractinia	Pocilloporidae	Pocillopora verrucosa	1	warty cauliflour coral	0.4
UVC	UVC_Site_4		2016-03-14	10.3211	-109.229	0_250m	20	Chordata	Actinopterygii	Perciformes	Lutjanidae	Lutjanus viridis	0.01	Blue and gold snapper	NA
UVC	UVC_Site_5		2016-03-14	10.2846	-109.21	0_250m	10	Chordata	Actinopterygii	Perciformes	Carangidae	Caranx melampygus	0.0166667	Bluefin trevally	NA
UVC	UVC_Site_5		2016-03-14	10.2846	-109.21	0_250m	10	Chordata	Actinopterygii	Perciformes	Scaridae	Scarus rubroviolaceus	0.01	Redlip parrotfish	NA
UVC	UVC_Site_5		2016-03-14	10.2846	-109.21	0_250m	10	Chordata	Actinopterygii	Perciformes	Labridae	Thalassoma robertsoni	2.71333	Clipperton rainbow wrasse	NA
UVC	UVC_Site_5		2016-03-14	10.2846	-109.21	0_250m	20	Chordata	Actinopterygii	Perciformes	Labridae	Thalassoma robertsoni	1.06	Clipperton rainbow wrasse	NA
UVC	UVC_Site_5		2016-03-14	10.2846	-109.21	0_250m	10	Chordata	Actinopterygii	Tetraodontiformes	Tetraodontidae	Canthigaster punctatissima	0.0133333	Spotted sharpmose puffer	NA
UVC	UVC_Site_5		2016-03-14	10.2846	-109.21	0_250m	10	Cnidaria	Anthozoa	Scleractinia	Agariciidae	Pavona minuta	1	leaf coral	0.4
UVC	UVC_Site_5		2016-03-14	10.2846	-109.21	0_250m	20	Chordata	Actinopterygii	Perciformes	Serranidae	Epinephelus clippertonensis	0.0133333	Clipperton grouper	NA
UVC	UVC_Site_5		2016-03-14	10.2846	-109.21	0_250m	10	Cnidaria	Anthozoa	Scleractinia	Poritidae	Porites lutea	3	hump coral	1.2
UVC	UVC_Site_5		2016-03-14	10.2846	-109.21	0_250m	10	Cnidaria	Anthozoa	Scleractinia	Poritidae	Porites lobata	46	lobe coral	18.4
UVC	UVC_Site_5		2016-03-14	10.2846	-109.21	0_250m	20	Chordata	Actinopterygii	Perciformes	Carangidae	Caranx melampygus	0.0433333	Bluefin trevally	NA
UVC	UVC_Site_5		2016-03-14	10.2846	-109.21	0_250m	20	Cnidaria	Anthozoa	Scleractinia	Agariciidae	Leptoseris scabra	1	rough coral	0.4
UVC	UVC_Site_5		2016-03-14	10.2846	-109.21	0_250m	20	Chordata	Actinopterygii	Perciformes	Pomacentridae	Stegastes beebei	0.0866667	Galapagos ringtail damselfish	NA
UVC	UVC_Site_5		2016-03-14	10.2846	-109.21	0_250m	10	Chordata	Actinopterygii	Perciformes	Serranidae	Paranthias colonus	1.25333	Pacific creolefish	NA
UVC	UVC_Site_5		2016-03-14	10.2846	-109.21	0_250m	20	Chordata	Actinopterygii	Perciformes	Chaetodontidae	Forcipiger flavissimus	0.00666667	Yellow longnose butterfly	NA
UVC	UVC_Site_5		2016-03-14	10.2846	-109.21	0_250m	20	Chordata	Actinopterygii	Anguilliformes	Muraenidae	Gymnothorax dovii	0.00333333	Speckled moray	NA
UVC	UVC_Site_5		2016-03-14	10.2846	-109.21	0_250m	20	Cnidaria	Anthozoa	Scleractinia	Agariciidae	Leptoseris incrustans	4	crust coral	1.6
UVC	UVC_Site_5		2016-03-14	10.2846	-109.21	0_250m	20	Chordata	Actinopterygii	Perciformes	Labridae	Thalassoma grammaticum	0.0466667	Sunset wrasse	NA
UVC	UVC_Site_5		2016-03-14	10.2846	-109.21	0_250m	10	Chordata	Actinopterygii	Perciformes	Labridae	Thalassoma grammaticum	0.0666667	Sunset wrasse	NA
UVC	UVC_Site_5		2016-03-14	10.2846	-109.21	0_250m	10	Chordata	Actinopterygii	Perciformes	Acanthuridae	Acanthurus nigricans	0.09	White cheek surgeonfish	NA
UVC	UVC_Site_5		2016-03-14	10.2846	-109.21	0_250m	20	Cnidaria	Anthozoa	Scleractinia	Poritidae	Porites lobata	98	lobe coral	39.2
UVC	UVC_Site_5		2016-03-14	10.2846	-109.21	0_250m	20	Cnidaria	Anthozoa	Scleractinia	Poritidae	Porites lutea	1	hump coral	0.4
UVC	UVC_Site_5		2016-03-14	10.2846	-109.21	0_250m	20	Chordata	Actinopterygii	Beryciformes	Holocentridae	Myripristis berndti	0.02	Blotcheye soldierfish	NA
UVC	UVC_Site_5		2016-03-14	10.2846	-109.21	0_250m	10	Chordata	Actinopterygii	Perciformes	Cirrhitidae	Cirrhitichthys oxycephalus	0.0933333	Coral hawkfish	NA
UVC	UVC_Site_5		2016-03-14	10.2846	-109.21	0_250m	10	Cnidaria	Anthozoa	Scleractinia	Agariciidae	Pavona clavus	2	swollen coral	0.8
UVC	UVC_Site_5		2016-03-14	10.2846	-109.21	0_250m	20	Cnidaria	Anthozoa	Scleractinia	Agariciidae	Pavona clavus	14	swollen coral	5.6
UVC	UVC_Site_5		2016-03-14	10.2846	-109.21	0_250m	10	Chordata	Actinopterygii	Tetraodontiformes	Balistidae	Sufflamen verres	0.01	Orangside triggerfish	NA
UVC	UVC_Site_5		2016-03-14	10.2846	-109.21	0_250m	20	Chordata	Actinopterygii	Perciformes	Carangidae	Caranx sexfasciatus	0.103333	Bigeye trevally	NA
UVC	UVC_Site_5		2016-03-14	10.2846	-109.21	0_250m	20	Chordata	Actinopterygii	Perciformes	Chaetodontidae	Johnrandallia nigrirostris	0.0466667	Blacknosed butterflyfish	NA
UVC	UVC_Site_5		2016-03-14	10.2846	-109.21	0_250m	10	Chordata	Actinopterygii	Perciformes	Serranidae	Dermatolepis dermatolepis	0.0566667	Leather bass	NA
UVC	UVC_Site_5		2016-03-14	10.2846	-109.21	0_250m	20	Chordata	Actinopterygii	Perciformes	Scaridae	Scarus rubroviolaceus	0.00666667	Redlip parrotfish	NA
UVC	UVC_Site_5		2016-03-14	10.2846	-109.21	0_250m	20	Chordata	Actinopterygii	Perciformes	Serranidae	Paranthias colonus	4.43667	Pacific creolefish	NA
UVC	UVC_Site_5		2016-03-14	10.2846	-109.21	0_250m	20	Chordata	Actinopterygii	Perciformes	Serranidae	Dermatolepis dermatolepis	0.02	Leather bass	NA
UVC	UVC_Site_5		2016-03-14	10.2846	-109.21	0_250m	10	Cnidaria	Anthozoa	Scleractinia	Agariciidae	Pavona varians	3	false brain coral	1.2
UVC	UVC_Site_5		2016-03-14	10.2846	-109.21	0_250m	20	Cnidaria	Anthozoa	Scleractinia	Agariciidae	Pavona maldivensis	2	maldives coral	0.8
UVC	UVC_Site_5		2016-03-14	10.2846	-109.21	0_250m	20	Chordata	Actinopterygii	Perciformes	Serranidae	Epinephelus labriformis	0.04	Starry grouper	NA
UVC	UVC_Site_5		2016-03-14	10.2846	-109.21	0_250m	10	Chordata	Actinopterygii	Perciformes	Serranidae	Epinephelus labriformis	0.0333333	Starry grouper	NA
UVC	UVC_Site_5		2016-03-14	10.2846	-109.21	0_250m	20	Chordata	Actinopterygii	Perciformes	Acanthuridae	Ctenochaetus marginatus	0.0566667	Stripedfin surgeonfish	NA
UVC	UVC_Site_5		2016-03-14	10.2846	-109.21	0_250m	20	Chordata	Actinopterygii	Perciformes	Cirrhitidae	Cirrhitichthys oxycephalus	0.0133333	Coral hawkfish	NA
UVC	UVC_Site_5		2016-03-14	10.2846	-109.21	0_250m	10	Chordata	Actinopterygii	Perciformes	Carangidae	Caranx sexfasciatus	0.08	White cheek surgeonfish	NA
UVC	UVC_Site_5		2016-03-14	10.2846	-109.21	0_250m	20	Chordata	Actinopterygii	Perciformes	Lutjanidae	Lutjanus viridis	0.106667	Blue and gold snapper	NA
UVC	UVC_Site_5		2016-03-14	10.2846	-109.21	0_250m	20	Chordata	Actinopterygii	Perciformes	Kyphosidae	Kyphosus elegans	0.35	Cortez sea chub	NA
UVC	UVC_Site_5		2016-03-14	10.2846	-109.21	0_250m	10	Cnidaria	Anthozoa	Scleractinia	Pocilloporidae	Pocillopora effusus	28	stony cauliflour coral	11.2
UVC	UVC_Site_5		2016-03-14	10.2846	-109.21	0_250m	20	Cnidaria	Anthozoa	Scleractinia	Pocilloporidae	Pocillopora effusus	5	stony cauliflour coral	2
UVC	UVC_Site_5		2016-03-14	10.2846	-109.21	0_250m	20	Chordata	Actinopterygii	Tetraodontiformes	Tetraodontidae	Arothron meleagris	0.04	Golden puffer	NA
UVC	UVC_Site_5		2016-03-14	10.2846	-109.21	0_250m	20	Cnidaria	Anthozoa	Scleractinia	Agariciidae	Pavona varians	14	false brain coral	5.6
UVC	UVC_Site_5		2016-03-14	10.2846	-109.21	0_250m	20	Chordata	Actinopterygii	Perciformes	Carangidae	Caranx lugubris	0.03	Black jack	NA
UVC	UVC_Site_5		2016-03-14	10.2846	-109.21	0_250m	20	Chordata	Actinopterygii	Syngnathiformes	Fistulariidae	Fistularia commersonii	0.00333333	Blue spotted coronetfish	NA
UVC	UVC_Site_5		2016-03-14	10.2846	-109.21	0_250m	10	Chordata	Actinopterygii	Perciformes	Carangidae	Caranx lugubris	0.00666667	Black jack	NA
UVC	UVC_Site_5		2016-03-14	10.2846	-109.21	0_250m	10	Cnidaria	Anthozoa	Scleractinia	Pocilloporidae	Pocillopora capitata	4	swollen cauliflour coral	1.6
UVC	UVC_Site_5		2016-03-14	10.2846	-109.21	0_250m	20	Chordata	Actinopterygii	Perciformes	Balistidae	Melichthys niger	0.14	Black triggerfish	NA
UVC	UVC_Site_5		2016-03-14	10.2846	-109.21	0_250m	10	Chordata	Actinopterygii	Perciformes	Pomacentridae	Stegastes beebei	0.746667	Galapagos ringtail damselfish	NA
UVC	UVC_Site_5		2016-03-14	10.2846	-109.21	0_250m	10	Chordata	Actinopterygii	Perciformes	Balistidae	Melichthys niger	0.0166667	Black triggerfish	NA
UVC	UVC_Site_5		2016-03-14	10.2846	-109.21	0_250m	20	Chordata	Actinopterygii	Perciformes	Zanclidae	Zanclus cornutus	0.12	Moorish idol	NA
UVC	UVC_Site_5		2016-03-14	10.2846	-109.21	0_250m	10	Chordata	Actinopterygii	Perciformes	Blenniidae	Ophioblennius steindachneri	0.0133333	Large banded blenny	NA
UVC	UVC_Site_5		2016-03-14	10.2846	-109.21	0_250m	10	Chordata	Actinopterygii	Tetraodontiformes	Monacanthidae	Cantherhines dumerilii	0.00333333	Barred filefish	NA
UVC	UVC_Site_5		2016-03-14	10.2846	-109.21	0_250m	10	Cnidaria	Anthozoa	Scleractinia	Pocilloporidae	Pocillopora meandrina	1	cauliflour coral	0.4
UVC	UVC_Site_5		2016-03-14	10.2846	-109.21	0_250m	10	Cnidaria	Anthozoa	Scleractinia	Pocilloporidae	Pocillopora eydouxi	1	antler coral	0.4
UVC	UVC_Site_5		2016-03-14	10.2846	-109.21	0_250m	10	Chordata	Actinopterygii	Tetraodontiformes	Tetraodontidae	Arothron meleagris	0.0133333	Golden puffer	NA
UVC	UVC_Site_5		2016-03-14	10.2846	-109.21	0_250m	20	Chordata	Actinopterygii	Perciformes	Labridae	Bodianus diplotaenia	0.01	Mexican hogfish	NA
UVC	UVC_Site_5		2016-03-14	10.2846	-109.21	0_250m	10	Cnidaria	Anthozoa	Scleractinia	Pocilloporidae	Pocillopora elegans	3	elegant cauliflour coral	1.2
UVC	UVC_Site_5		2016-03-14	10.2846	-109.21	0_250m	20	Chordata	Actinopterygii	Perciformes	Pomacanthidae	Holacanthus clarionensis	0.0466667	Clarion angelfish	NA
UVC	UVC_Site_5		2016-03-14	10.2846	-109.21	0_250m	20	Chordata	Actinopterygii	Perciformes	Acanthuridae	Acanthurus nigricans	0.126667	White cheek surgeonfish	NA
UVC	UVC_Site_5		2016-03-14	10.2846	-109.21	0_250m	20	Chordata	Actinopterygii	Syngnathiformes	Aulostomidae	Aulostomus chinensis	0.00333333	Chinese trumpetfish	NA
UVC	UVC_Site_5		2016-03-14	10.2846	-109.21	0_250m	10	Chordata	Actinopterygii	Perciformes	Acanthuridae	Ctenochaetus marginatus	0.0733333	Stripedfin surgeonfish	NA
UVC	UVC_Site_5		2016-03-14	10.2846	-109.21	0_250m	20	Chordata	Actinopterygii	Perciformes	Kyphosidae	Kyphosus analogus	0.24	Blue-bronze sea chub	NA
UVC	UVC_Site_5		2016-03-14	10.2846	-109.21	0_250m	10	Chordata	Actinopterygii	Perciformes	Pomacanthidae	Holacanthus clarionensis	0.00666667	Clarion angelfish	NA
UVC	UVC_Site_5		2016-03-14	10.2846	-109.21	0_250m	20	Cnidaria	Anthozoa	Scleractinia	Poritidae	Porites arnaudi	72	Porites arnaudi	28.8
UVC	UVC_Site_5		2016-03-14	10.2846	-109.21	0_250m	20	Chordata	Actinopterygii	Perciformes	Labridae	Stethojulis bandanensis	0.00666667	Red shoulder wrasse	NA
UVC	UVC_Site_5		2016-03-14	10.2846	-109.21	0_250m	10	Chordata	Actinopterygii	Perciformes	Cirrhitidae	Cirrhitus rivulatus	0.00666667	Giant hawkfish	NA
UVC	UVC_Site_5		2016-03-14	10.2846	-109.21	0_250m	10	Chordata	Actinopterygii	Anguilliformes	Muraenidae	Echidna nebulosa	0.00333333	Snowflake moray	NA
UVC	UVC_Site_5		2016-03-14	10.2846	-109.21	0_250m	10	Cnidaria	Anthozoa	Scleractinia	Dendrophylliidae	Tubastraea coccinea	1	orange cup coral	0.4
UVC	UVC_Site_5		2016-03-14	10.2846	-109.21	0_250m	10	Chordata	Actinopterygii	Perciformes	Labridae	Stethojulis bandanensis	0.00666667	Red shoulder wrasse	NA
UVC	UVC_Site_5		2016-03-14	10.2846	-109.21	0_250m	10	Chordata	Actinopterygii	Perciformes	Zanclidae	Zanclus cornutus	0.02	Moorish idol	NA
UVC	UVC_Site_6		2016-03-15	10.3149	-109.212	0_250m	10	Chordata	Actinopterygii	Perciformes	Acanthuridae	Ctenochaetus marginatus	0.0733333	Stripedfin surgeonfish	NA
UVC	UVC_Site_6		2016-03-15	10.3149	-109.212	0_250m	10	Chordata	Actinopterygii	Perciformes	Serranidae	Paranthias colonus	1.25333	Pacific creolefish	NA
UVC	UVC_Site_6		2016-03-15	10.3149	-109.212	0_250m	20	Chordata	Actinopterygii	Perciformes	Serranidae	Paranthias colonus	2.39	Pacific creolefish	NA
UVC	UVC_Site_6		2016-03-15	10.3149	-109.212	0_250m	20	Chordata	Actinopterygii	Tetraodontiformes	Balistidae	Sufflamen verres	0.02	Orangside triggerfish	NA
UVC	UVC_Site_6		2016-03-15	10.3149	-109.212	0_250m	20	Chordata	Actinopterygii	Tetraodontiformes	Monacanthidae	Cantherhines dumerilii	0.0133333	Barred filefish	NA
UVC	UVC_Site_6		2016-03-15	10.3149	-109.212	0_250m	20	Chordata	Actinopterygii	Perciformes	Chaetodontidae	Johnrandallia nigrirostris	0.126667	Blacknosed butterflyfish	NA
UVC	UVC_Site_6		2016-03-15	10.3149	-109.212	0_250m	10	Chordata	Actinopterygii	Perciformes	Chaetodontidae	Johnrandallia nigrirostris	0.00666667	Blacknosed butterflyfish	NA
UVC	UVC_Site_6		2016-03-15	10.3149	-109.212	0_250m	20	Chordata	Actinopterygii	Perciformes	Zanclidae	Zanclus cornutus	0.0333333	Moorish idol	NA
UVC	UVC_Site_6		2016-03-15	10.3149	-109.212	0_250m	20	Chordata	Actinopterygii	Perciformes	Acanthuridae	Ctenochaetus marginatus	0.14	Stripedfin surgeonfish	NA
UVC	UVC_Site_6		2016-03-15	10.3149	-109.212	0_250m	10	Chordata	Actinopterygii	Perciformes	Carangidae	Caranx melampygus	0.07	Bluefin trevally	NA
UVC	UVC_Site_6		2016-03-15	10.3149	-109.212	0_250m	10	Chordata	Actinopterygii	Perciformes	Zanclidae	Zanclus cornutus	0.00666667	Moorish idol	NA
UVC	UVC_Site_6		2016-03-15	10.3149	-109.212	0_250m	10	Cnidaria	Anthozoa	Scleractinia	Poritidae	Porites lutea	3	hump coral	1.2
UVC	UVC_Site_6		2016-03-15	10.3149	-109.212	0_250m	10	Chordata	Actinopterygii	Tetraodontiformes	Tetraodontidae	Canthigaster punctatissima	0.0133333	Spotted sharpmose puffer	NA
UVC	UVC_Site_6		2016-03-15	10.3149	-109.212	0_250m	20	Chordata	Actinopterygii	Tetraodontiformes	Tetraodontidae	Arothron meleagris	0.01	Golden puffer	NA
UVC	UVC_Site_6		2016-03-15	10.3149	-109.212	0_250m	10	Chordata	Actinopterygii	Tetraodontiformes	Tetraodontidae	Arothron meleagris	0.0133333	Golden puffer	NA
UVC	UVC_Site_6		2016-03-15	10.3149	-109.212	0_250m	20	Chordata	Actinopterygii	Perciformes	Acanthuridae	Acanthurus nigricans	0.253333	White cheek surgeonfish	NA
UVC	UVC_Site_6		2016-03-15	10.3149	-109.212	0_250m	20	Chordata	Actinopterygii	Scorpaeniformes	Caracanthidae	Caracanthus maculatus	0.00333333	Spotted coral croucher	NA
UVC	UVC_Site_6		2016-03-15	10.3149	-109.212	0_250m	10	Chordata	Actinopterygii	Perciformes	Acanthuridae	Acanthurus nigricans	0.143333	White cheek surgeonfish	NA
UVC	UVC_Site_6		2016-03-15	10.3149	-109.212	0_250m	20	Cnidaria	Anthozoa	Scleractinia	Poritidae	Porites lutea	10	hump coral	4
UVC	UVC_Site_6		2016-03-15	10.3149	-109.212	0_250m	10	Chordata	Actinopterygii	Perciformes	Serranidae	Epinephelus labriformis	0.0233333	Starry grouper	NA
UVC	UVC_Site_6		2016-03-15	10.3149	-109.212	0_250m	10	Chordata	Actinopterygii	Perciformes	Balistidae	Melichthys niger	0.0333333	Black triggerfish	NA
UVC	UVC_Site_6		2016-03-15	10.3149	-109.212	0_250m	20	Chordata	Actinopterygii	Perciformes	Serranidae	Epinephelus labriformis	0.183333	Starry grouper	NA
UVC	UVC_Site_6		2016-03-15	10.3149	-109.212	0_250m	20	Chordata	Actinopterygii	Perciformes	Carangidae	Caranx melampygus	0.0466667	Bluefin trevally	NA
UVC	UVC_Site_6		2016-03-15	10.3149	-109.212	0_250m	20	Chordata	Actinopterygii	Tetraodontiformes	Tetraodontidae	Canthigaster punctatissima	0.02	Spotted sharpmose puffer	NA
UVC	UVC_Site_6		2016-03-15	10.3149	-109.212	0_250m	10	Chordata	Actinopterygii	Tetraodontiformes	Balistidae	Sufflamen verres	0.01	Orangside triggerfish	NA
UVC	UVC_Site_6		2016-03-15	10.3149	-109.212	0_250m	20	Chordata	Chondrichthyes	Carcharhiniformes	Carcharhinidae	Triaenodon obesus	0.00333333	Whitetip reef shark	NA
UVC	UVC_Site_6		2016-03-15	10.3149	-109.212	0_250m	20	Chordata	Actinopterygii	Perciformes	Balistidae	Melichthys niger	0.0866667	Black triggerfish	NA
UVC	UVC_Site_6		2016-03-15	10.3149	-109.212	0_250m	10	Chordata	Actinopterygii	Perciformes	Chaetodontidae	Forcipiger flavissimus	0.0133333	Yellow longnose butterfly	NA
UVC	UVC_Site_6		2016-03-15	10.3149	-109.212	0_250m	20	Chordata	Actinopterygii	Perciformes	Mullidae	Mulloidichthys dentatus	0.00333333	Mexican goatfish	NA
UVC	UVC_Site_6		2016-03-15	10.3149	-109.212	0_250m	10	Chordata	Actinopterygii	Anguilliformes	Muraenidae	Gymnothorax dovii	0.00333333	Speckled moray	NA
UVC	UVC_Site_6		2016-03-15	10.3149	-109.212	0_250m	10	Chordata	Actinopterygii	Perciformes	Lutjanidae	Lutjanus viridis	0.0166667	Blue and gold snapper	NA
UVC	UVC_Site_6		2016-03-15	10.3149	-109.212	0_250m	20	Chordata	Actinopterygii	Perciformes	Pomacanthidae	Holacanthus clarionensis	0.04	Clarion angelfish	NA
UVC	UVC_Site_6		2016-03-15	10.3149	-109.212	0_250m	10	Chordata	Actinopterygii	Perciformes	Pomacanthidae	Holacanthus clarionensis	0.02	Clarion angelfish	NA
UVC	UVC_Site_6		2016-03-15	10.3149	-109.212	0_250m	10	Cnidaria	Anthozoa	Scleractinia	Agariciidae	Pavona varians	3	false brain coral	1.2
UVC	UVC_Site_6		2016-03-15	10.3149	-109.212	0_250m	20	Cnidaria	Anthozoa	Scleractinia	Agariciidae	Pavona varians	39	false brain coral	15.6
UVC	UVC_Site_6		2016-03-15	10.3149	-109.212	0_250m	10	Cnidaria	Anthozoa	Scleractinia	Pocilloporidae	Pocillopora meandrina	1	cauliflour coral	0.4
UVC	UVC_Site_6		2016-03-15	10.3149	-109.212	0_250m	20	Chordata	Actinopterygii	Perciformes	Serranidae	Epinephelus clippertonensis	0.0333333	Clipperton grouper	NA
UVC	UVC_Site_6		2016-03-15	10.3149	-109.212	0_250m	10	Cnidaria	Anthozoa	Scleractinia	Pocilloporidae	Pocillopora eydouxi	1	antler coral	0.4
UVC	UVC_Site_6		2016-03-15	10.3149	-109.212	0_250m	20	Chordata	Actinopterygii	Perciformes	Scaridae	Scarus rubroviolaceus	0.0133333	Redlip parrotfish	NA
UVC	UVC_Site_6		2016-03-15	10.3149	-109.212	0_250m	20	Chordata	Actinopterygii	Perciformes	Pomacentridae	Stegastes beebei	0.12	Galapagos ringtail damselfish	NA
UVC	UVC_Site_6		2016-03-15	10.3149	-109.212	0_250m	20	Chordata	Actinopterygii	Perciformes	Chaetodontidae	Forcipiger flavissimus	0.0733333	Yellow longnose butterfly	NA
UVC	UVC_Site_6		2016-03-15	10.3149	-109.212	0_250m	20	Chordata	Actinopterygii	Anguilliformes	Muraenidae	Gymnothorax dovii	0.0133333	Speckled moray	NA
UVC	UVC_Site_6		2016-03-15	10.3149	-109.212	0_250m	10	Cnidaria	Anthozoa	Scleractinia	Dendrophylliidae	Tubastraea coccinea	1	orange cup coral	0.4
UVC	UVC_Site_6		2016-03-15	10.3149	-109.212	0_250m	20	Chordata	Actinopterygii	Perciformes	Lutjanidae	Lutjanus viridis	0.346667	Blue and gold snapper	NA
UVC	UVC_Site_6		2016-03-15	10.3149	-109.212	0_250m	10	Cnidaria	Anthozoa	Scleractinia	Pocilloporidae	Pocillopora capitata	4	swollen cauliflour coral	1.6
UVC	UVC_Site_6		2016-03-15	10.3149	-109.212	0_250m	20	Chordata	Actinopterygii	Perciformes	Kyphosidae	Kyphosus elegans	0.0133333	Cortez sea chub	NA
UVC	UVC_Site_6		2016-03-15	10.3149	-109.212	0_250m	20	Chordata	Actinopterygii	Perciformes	Carangidae	Caranx lugubris	0.0266667	Black jack	NA
UVC	UVC_Site_6		2016-03-15	10.3149	-109.212	0_250m	10	Chordata	Actinopterygii	Perciformes	Carangidae	Caranx lugubris	0.01	Black jack	NA
UVC	UVC_Site_6		2016-03-15	10.3149	-109.212	0_250m	10	Cnidaria	Anthozoa	Scleractinia	Pocilloporidae	Pocillopora effusus	28	stony cauliflour coral	11.2
UVC	UVC_Site_6		2016-03-15	10.3149	-109.212	0_250m	20	Cnidaria	Anthozoa	Scleractinia	Pocilloporidae	Pocillopora effusus	1	stony cauliflour coral	0.4
UVC	UVC_Site_6		2016-03-15	10.3149	-109.212	0_250m	10	Chordata	Actinopterygii	Perciformes	Mullidae	Mulloidichthys dentatus	0.01	Mexican goatfish	NA
UVC	UVC_Site_6		2016-03-15	10.3149	-109.212	0_250m	10	Cnidaria	Anthozoa	Scleractinia	Pocilloporidae	Pocillopora elegans	3	elegant cauliflour coral	1.2
UVC	UVC_Site_6		2016-03-15	10.3149	-109.212	0_250m	20	Chordata	Actinopterygii	Perciformes	Blenniidae	Ophioblennius steindachneri	0.00666667	Large banded blenny	NA
UVC	UVC_Site_6		2016-03-15	10.3149	-109.212	0_250m	10	Chordata	Actinopterygii	Perciformes	Blenniidae	Ophioblennius steindachneri	0.0133333	Large banded blenny	NA
UVC	UVC_Site_6		2016-03-15	10.3149	-109.212	0_250m	20	Chordata	Actinopterygii	Perciformes	Labridae	Bodianus diplotaenia	0.0133333	Mexican hogfish	NA
UVC	UVC_Site_6		2016-03-15	10.3149	-109.212	0_250m	20	Cnidaria	Anthozoa	Scleractinia	Agariciidae	Pavona clavus	6	swollen coral	2.4
UVC	UVC_Site_6		2016-03-15	10.3149	-109.212	0_250m	10	Chordata	Actinopterygii	Perciformes	Serranidae	Epinephelus clippertonensis	0.00666667	Clipperton grouper	NA
UVC	UVC_Site_6		2016-03-15	10.3149	-109.212	0_250m	20	Cnidaria	Anthozoa	Scleractinia	Agariciidae	Leptoseris incrustans	6	crust coral	2.4
UVC	UVC_Site_6		2016-03-15	10.3149	-109.212	0_250m	10	Chordata	Actinopterygii	Perciformes	Labridae	Thalassoma grammaticum	0.0666667	Sunset wrasse	NA
UVC	UVC_Site_6		2016-03-15	10.3149	-109.212	0_250m	20	Chordata	Actinopterygii	Perciformes	Labridae	Thalassoma grammaticum	0.0866667	Sunset wrasse	NA
UVC	UVC_Site_6		2016-03-15	10.3149	-109.212	0_250m	20	Chordata	Actinopterygii	Perciformes	Serranidae	Dermatolepis dermatolepis	0.0333333	Leather bass	NA
UVC	UVC_Site_6		2016-03-15	10.3149	-109.212	0_250m	10	Chordata	Actinopterygii	Perciformes	Serranidae	Dermatolepis dermatolepis	0.00666667	Leather bass	NA
UVC	UVC_Site_6		2016-03-15	10.3149	-109.212	0_250m	10	Chordata	Actinopterygii	Perciformes	Cirrhitidae	Cirrhitichthys oxycephalus	0.0866667	Coral hawkfish	NA
UVC	UVC_Site_6		2016-03-15	10.3149	-109.212	0_250m	20	Chordata	Actinopterygii	Perciformes	Cirrhitidae	Cirrhitichthys oxycephalus	0.04	Coral hawkfish	NA
UVC	UVC_Site_6		2016-03-15	10.3149	-109.212	0_250m	20	Chordata	Actinopterygii	Beryciformes	Holocentridae	Myripristis berndti	0.393333	Blotcheye soldierfish	NA
UVC	UVC_Site_6		2016-03-15	10.3149	-109.212	0_250m	10	Chordata	Actinopterygii	Perciformes	Pomacentridae	Stegastes beebei	1.56667	Galapagos ringtail damselfish	NA
UVC	UVC_Site_6		2016-03-15	10.3149	-109.212	0_250m	10	Cnidaria	Anthozoa	Scleractinia	Agariciidae	Pavona clavus	2	swollen coral	0.8
UVC	UVC_Site_6		2016-03-15	10.3149	-109.212	0_250m	20	Chordata	Actinopterygii	Perciformes	Cirrhitidae	Cirrhitus rivulatus	0.00666667	Giant hawkfish	NA
UVC	UVC_Site_6		2016-03-15	10.3149	-109.212	0_250m	10	Chordata	Actinopterygii	Perciformes	Labridae	Thalassoma robertsoni	1.32	Clipperton rainbow wrasse	NA
UVC	UVC_Site_6		2016-03-15	10.3149	-109.212	0_250m	20	Chordata	Actinopterygii	Perciformes	Labridae	Thalassoma robertsoni	1.31333	Clipperton rainbow wrasse	NA
UVC	UVC_Site_6		2016-03-15	10.3149	-109.212	0_250m	10	Chordata	Actinopterygii	Perciformes	Labridae	Stethojulis bandanensis	0.0133333	Red shoulder wrasse	NA
UVC	UVC_Site_6		2016-03-15	10.3149	-109.212	0_250m	10	Chordata	Actinopterygii	Perciformes	Scaridae	Scarus rubroviolaceus	0.00666667	Redlip parrotfish	NA
UVC	UVC_Site_6		2016-03-15	10.3149	-109.212	0_250m	10	Cnidaria	Anthozoa	Scleractinia	Agariciidae	Pavona minuta	1	leaf coral	0.4
UVC	UVC_Site_6		2016-03-15	10.3149	-109.212	0_250m	10	Cnidaria	Anthozoa	Scleractinia	Poritidae	Porites lobata	46	lobe coral	18.4
UVC	UVC_Site_6		2016-03-15	10.3149	-109.212	0_250m	20	Cnidaria	Anthozoa	Scleractinia	Poritidae	Porites arnaudi	80	Porites arnaudi	32
UVC	UVC_Site_6		2016-03-15	10.3149	-109.212	0_250m	20	Cnidaria	Anthozoa	Scleractinia	Poritidae	Porites lobata	56	lobe coral	22.4
UVC	UVC_Site_7		2016-03-15	10.3036	-109.198	0_250m	20	Cnidaria	Anthozoa	Scleractinia	Pocilloporidae	Pocillopora meandrina	1	cauliflour coral	0.4
UVC	UVC_Site_7		2016-03-15	10.3036	-109.198	0_250m	20	Chordata	Actinopterygii	Tetraodontiformes	Balistidae	Sufflamen verres	0.00333333	Orangside triggerfish	NA
UVC	UVC_Site_7		2016-03-15	10.3036	-109.198	0_250m	20	Cnidaria	Anthozoa	Scleractinia	Poritidae	Porites arnaudi	3	Porites arnaudi	1.2
UVC	UVC_Site_7		2016-03-15	10.3036	-109.198	0_250m	20	Cnidaria	Anthozoa	Scleractinia	Poritidae	Porites lobata	8	lobe coral	3.2
UVC	UVC_Site_7		2016-03-15	10.3036	-109.198	0_250m	10	Cnidaria	Anthozoa	Scleractinia	Poritidae	Porites lobata	101	lobe coral	40.4
UVC	UVC_Site_7		2016-03-15	10.3036	-109.198	0_250m	10	Chordata	Actinopterygii	Perciformes	Acanthuridae	Acanthurus nigricans	0.326667	White cheek surgeonfish	NA
UVC	UVC_Site_7		2016-03-15	10.3036	-109.198	0_250m	10	Chordata	Actinopterygii	Tetraodontiformes	Balistidae	Sufflamen verres	0.01	Orangside triggerfish	NA
UVC	UVC_Site_7		2016-03-15	10.3036	-109.198	0_250m	20	Cnidaria	Anthozoa	Scleractinia	Agariciidae	Pavona maldivensis	7	maldives coral	2.8
UVC	UVC_Site_7		2016-03-15	10.3036	-109.198	0_250m	20	Cnidaria	Anthozoa	Scleractinia	Agariciidae	Leptoseris incrustans	5	crust coral	2
UVC	UVC_Site_7		2016-03-15	10.3036	-109.198	0_250m	20	Chordata	Actinopterygii	Beryciformes	Holocentridae	Myripristis berndti	0.13	Blotcheye soldierfish	NA
UVC	UVC_Site_7		2016-03-15	10.3036	-109.198	0_250m	10	Chordata	Actinopterygii	Beryciformes	Holocentridae	Myripristis berndti	0.00666667	Blotcheye soldierfish	NA
UVC	UVC_Site_7		2016-03-15	10.3036	-109.198	0_250m	10	Cnidaria	Anthozoa	Scleractinia	Poritidae	Porites lutea	16	hump coral	6.4
UVC	UVC_Site_7		2016-03-15	10.3036	-109.198	0_250m	20	Cnidaria	Anthozoa	Scleractinia	Poritidae	Porites lutea	3	hump coral	1.2
UVC	UVC_Site_7		2016-03-15	10.3036	-109.198	0_250m	10	Cnidaria	Anthozoa	Scleractinia	Agariciidae	Pavona clavus	3	swollen coral	1.2
UVC	UVC_Site_7		2016-03-15	10.3036	-109.198	0_250m	20	Chordata	Chondrichthyes	Carcharhiniformes	Carcharhinidae	Carcharhinus albimarginatus	0.00333333	Silvertip shark	NA
UVC	UVC_Site_7		2016-03-15	10.3036	-109.198	0_250m	10	Chordata	Actinopterygii	Perciformes	Acanthuridae	Ctenochaetus marginatus	0.1	Stripedfin surgeonfish	NA
UVC	UVC_Site_7		2016-03-15	10.3036	-109.198	0_250m	20	Cnidaria	Anthozoa	Scleractinia	Agariciidae	Pavona varians	22	false brain coral	8.8
UVC	UVC_Site_7		2016-03-15	10.3036	-109.198	0_250m	10	Chordata	Actinopterygii	Tetraodontiformes	Tetraodontidae	Canthigaster punctatissima	0.0133333	Spotted sharpmose puffer	NA
UVC	UVC_Site_7		2016-03-15	10.3036	-109.198	0_250m	10	Cnidaria	Anthozoa	Scleractinia	Pocilloporidae	Pocillopora effusus	20	stony cauliflour coral	8
UVC	UVC_Site_7		2016-03-15	10.3036	-109.198	0_250m	20	Chordata	Actinopterygii	Anguilliformes	Muraenidae	Gymnothorax flavimarginatus	0.00333333	Yellow edged moray	NA
UVC	UVC_Site_7		2016-03-15	10.3036	-109.198	0_250m	20	Chordata	Actinopterygii	Anguilliformes	Muraenidae	Gymnothorax dovii	0.00333333	Speckled moray	NA
UVC	UVC_Site_7		2016-03-15	10.3036	-109.198	0_250m	10	Chordata	Actinopterygii	Anguilliformes	Muraenidae	Gymnothorax dovii	0.00666667	Speckled moray	NA
UVC	UVC_Site_7		2016-03-15	10.3036	-109.198	0_250m	20	Cnidaria	Anthozoa	Scleractinia	Agariciidae	Pavona minuta	1	leaf coral	0.4
UVC	UVC_Site_7		2016-03-15	10.3036	-109.198	0_250m	10	Cnidaria	Anthozoa	Scleractinia	Agariciidae	Pavona varians	2	false brain coral	0.8
UVC	UVC_Site_7		2016-03-15	10.3036	-109.198	0_250m	20	Chordata	Actinopterygii	Perciformes	Acanthuridae	Acanthurus nigricans	0.153333	White cheek surgeonfish	NA
UVC	UVC_Site_7		2016-03-15	10.3036	-109.198	0_250m	20	Chordata	Actinopterygii	Tetraodontiformes	Tetraodontidae	Arothron meleagris	0.0133333	Golden puffer	NA
UVC	UVC_Site_7		2016-03-15	10.3036	-109.198	0_250m	10	Chordata	Actinopterygii	Tetraodontiformes	Tetraodontidae	Arothron meleagris	0.00333333	Golden puffer	NA
UVC	UVC_Site_7		2016-03-15	10.3036	-109.198	0_250m	20	Chordata	Actinopterygii	Perciformes	Balistidae	Melichthys niger	0.00333333	Black triggerfish	NA
UVC	UVC_Site_7		2016-03-15	10.3036	-109.198	0_250m	20	Chordata	Actinopterygii	Perciformes	Cirrhitidae	Cirrhitichthys oxycephalus	0.02	Coral hawkfish	NA
UVC	UVC_Site_7		2016-03-15	10.3036	-109.198	0_250m	20	Chordata	Actinopterygii	Perciformes	Labridae	Thalassoma robertsoni	1.32667	Clipperton rainbow wrasse	NA
UVC	UVC_Site_7		2016-03-15	10.3036	-109.198	0_250m	20	Chordata	Actinopterygii	Perciformes	Serranidae	Paranthias colonus	4.66667	Pacific creolefish	NA
UVC	UVC_Site_7		2016-03-15	10.3036	-109.198	0_250m	10	Chordata	Actinopterygii	Perciformes	Serranidae	Paranthias colonus	1.1	Pacific creolefish	NA
UVC	UVC_Site_7		2016-03-15	10.3036	-109.198	0_250m	10	Chordata	Actinopterygii	Perciformes	Carangidae	Caranx melampygus	0.04	Bluefin trevally	NA
UVC	UVC_Site_7		2016-03-15	10.3036	-109.198	0_250m	20	Chordata	Actinopterygii	Perciformes	Carangidae	Caranx melampygus	0.156667	Bluefin trevally	NA
UVC	UVC_Site_7		2016-03-15	10.3036	-109.198	0_250m	10	Chordata	Actinopterygii	Perciformes	Carangidae	Caranx sexfasciatus	0.0766667	White cheek surgeonfish	NA
UVC	UVC_Site_7		2016-03-15	10.3036	-109.198	0_250m	20	Chordata	Actinopterygii	Perciformes	Carangidae	Caranx sexfasciatus	0.0133333	White cheek surgeonfish	NA
UVC	UVC_Site_7		2016-03-15	10.3036	-109.198	0_250m	10	Chordata	Actinopterygii	Perciformes	Serranidae	Epinephelus labriformis	0.09	Starry grouper	NA
UVC	UVC_Site_7		2016-03-15	10.3036	-109.198	0_250m	20	Chordata	Actinopterygii	Perciformes	Chaetodontidae	Johnrandallia nigrirostris	0.0133333	Blacknosed butterflyfish	NA
UVC	UVC_Site_7		2016-03-15	10.3036	-109.198	0_250m	20	Chordata	Actinopterygii	Perciformes	Serranidae	Epinephelus clippertonensis	0.01	Clipperton grouper	NA
UVC	UVC_Site_7		2016-03-15	10.3036	-109.198	0_250m	10	Chordata	Actinopterygii	Perciformes	Labridae	Bodianus diplotaenia	0.00666667	Mexican hogfish	NA
UVC	UVC_Site_7		2016-03-15	10.3036	-109.198	0_250m	20	Chordata	Actinopterygii	Perciformes	Serranidae	Dermatolepis dermatolepis	0.0133333	Leather bass	NA
UVC	UVC_Site_7		2016-03-15	10.3036	-109.198	0_250m	10	Chordata	Actinopterygii	Perciformes	Mullidae	Mulloidichthys dentatus	0.00666667	Mexican goatfish	NA
UVC	UVC_Site_7		2016-03-15	10.3036	-109.198	0_250m	20	Chordata	Actinopterygii	Perciformes	Labridae	Stethojulis bandanensis	0.0133333	Red shoulder wrasse	NA
UVC	UVC_Site_7		2016-03-15	10.3036	-109.198	0_250m	20	Chordata	Actinopterygii	Perciformes	Pomacentridae	Stegastes beebei	0.233333	Galapagos ringtail damselfish	NA
UVC	UVC_Site_7		2016-03-15	10.3036	-109.198	0_250m	20	Chordata	Actinopterygii	Perciformes	Carangidae	Caranx lugubris	0.02	Black jack	NA
UVC	UVC_Site_7		2016-03-15	10.3036	-109.198	0_250m	10	Chordata	Actinopterygii	Perciformes	Kyphosidae	Kyphosus elegans	0.00666667	Cortez sea chub	NA
UVC	UVC_Site_7		2016-03-15	10.3036	-109.198	0_250m	20	Chordata	Actinopterygii	Perciformes	Chaetodontidae	Forcipiger flavissimus	0.00666667	Yellow longnose butterfly	NA
UVC	UVC_Site_7		2016-03-15	10.3036	-109.198	0_250m	20	Chordata	Actinopterygii	Perciformes	Kyphosidae	Kyphosus analogus	0.0133333	Blue-bronze sea chub	NA
UVC	UVC_Site_7		2016-03-15	10.3036	-109.198	0_250m	10	Chordata	Actinopterygii	Perciformes	Pomacanthidae	Holacanthus clarionensis	0.0233333	Clarion angelfish	NA
UVC	UVC_Site_7		2016-03-15	10.3036	-109.198	0_250m	10	Chordata	Actinopterygii	Perciformes	Serranidae	Dermatolepis dermatolepis	0.0466667	Leather bass	NA
UVC	UVC_Site_7		2016-03-15	10.3036	-109.198	0_250m	10	Chordata	Actinopterygii	Perciformes	Pomacentridae	Stegastes beebei	1.94	Galapagos ringtail damselfish	NA
UVC	UVC_Site_7		2016-03-15	10.3036	-109.198	0_250m	10	Chordata	Actinopterygii	Perciformes	Cirrhitidae	Cirrhitichthys oxycephalus	0.48	Coral hawkfish	NA
UVC	UVC_Site_7		2016-03-15	10.3036	-109.198	0_250m	10	Chordata	Actinopterygii	Perciformes	Scaridae	Scarus rubroviolaceus	0.0433333	Redlip parrotfish	NA
UVC	UVC_Site_7		2016-03-15	10.3036	-109.198	0_250m	20	Chordata	Actinopterygii	Perciformes	Scaridae	Scarus rubroviolaceus	0.0133333	Redlip parrotfish	NA
UVC	UVC_Site_7		2016-03-15	10.3036	-109.198	0_250m	20	Chordata	Actinopterygii	Perciformes	Acanthuridae	Ctenochaetus marginatus	0.04	Stripedfin surgeonfish	NA
UVC	UVC_Site_7		2016-03-15	10.3036	-109.198	0_250m	20	Chordata	Actinopterygii	Perciformes	Blenniidae	Ophioblennius steindachneri	0.0266667	Large banded blenny	NA
UVC	UVC_Site_7		2016-03-15	10.3036	-109.198	0_250m	10	Chordata	Actinopterygii	Perciformes	Blenniidae	Ophioblennius steindachneri	0.02	Large banded blenny	NA
UVC	UVC_Site_7		2016-03-15	10.3036	-109.198	0_250m	20	Chordata	Actinopterygii	Perciformes	Serranidae	Epinephelus labriformis	0.06	Starry grouper	NA
UVC	UVC_Site_7		2016-03-15	10.3036	-109.198	0_250m	20	Chordata	Actinopterygii	Perciformes	Pomacanthidae	Holacanthus clarionensis	0.04	Clarion angelfish	NA
UVC	UVC_Site_7		2016-03-15	10.3036	-109.198	0_250m	10	Chordata	Actinopterygii	Perciformes	Sphyraenidae	Sphyraena qenie	0.00333333	Blackfin barracuda	NA
UVC	UVC_Site_7		2016-03-15	10.3036	-109.198	0_250m	20	Chordata	Actinopterygii	Syngnathiformes	Aulostomidae	Aulostomus chinensis	0.00333333	Chinese trumpetfish	NA
UVC	UVC_Site_7		2016-03-15	10.3036	-109.198	0_250m	10	Chordata	Actinopterygii	Perciformes	Labridae	Thalassoma robertsoni	1.58	Clipperton rainbow wrasse	NA
UVC	UVC_Site_7		2016-03-15	10.3036	-109.198	0_250m	20	Chordata	Actinopterygii	Scorpaeniformes	Caracanthidae	Caracanthus maculatus	0.00333333	Spotted coral croucher	NA
UVC	UVC_Site_7		2016-03-15	10.3036	-109.198	0_250m	20	Chordata	Actinopterygii	Perciformes	Labridae	Thalassoma grammaticum	0.0866667	Sunset wrasse	NA
UVC	UVC_Site_7		2016-03-15	10.3036	-109.198	0_250m	10	Chordata	Actinopterygii	Perciformes	Labridae	Thalassoma grammaticum	0.0466667	Sunset wrasse	NA
UVC	UVC_Site_7		2016-03-15	10.3036	-109.198	0_250m	10	Chordata	Actinopterygii	Perciformes	Balistidae	Melichthys niger	0.06	Black triggerfish	NA
UVC	UVC_Site_7		2016-03-15	10.3036	-109.198	0_250m	10	Chordata	Actinopterygii	Perciformes	Zanclidae	Zanclus cornutus	0.0266667	Moorish idol	NA
UVC	UVC_Site_7		2016-03-15	10.3036	-109.198	0_250m	20	Chordata	Actinopterygii	Perciformes	Zanclidae	Zanclus cornutus	0.06	Moorish idol	NA
UVC	UVC_Site_8		2016-03-16	10.2942	-109.2	0_250m	10	Chordata	Actinopterygii	Perciformes	Serranidae	Epinephelus labriformis	0.02	Starry grouper	NA
UVC	UVC_Site_8		2016-03-16	10.2942	-109.2	0_250m	20	Chordata	Actinopterygii	Tetraodontiformes	Balistidae	Sufflamen verres	0.0166667	Orangside triggerfish	NA
UVC	UVC_Site_8		2016-03-16	10.2942	-109.2	0_250m	10	Chordata	Actinopterygii	Perciformes	Labridae	Thalassoma grammaticum	0.0733333	Sunset wrasse	NA
UVC	UVC_Site_8		2016-03-16	10.2942	-109.2	0_250m	10	Chordata	Actinopterygii	Perciformes	Scaridae	Scarus rubroviolaceus	0.02	Redlip parrotfish	NA
UVC	UVC_Site_8		2016-03-16	10.2942	-109.2	0_250m	10	Chordata	Actinopterygii	Perciformes	Balistidae	Melichthys niger	0.03	Black triggerfish	NA
UVC	UVC_Site_8		2016-03-16	10.2942	-109.2	0_250m	20	Chordata	Actinopterygii	Perciformes	Labridae	Thalassoma grammaticum	0.02	Sunset wrasse	NA
UVC	UVC_Site_8		2016-03-16	10.2942	-109.2	0_250m	10	Chordata	Actinopterygii	Perciformes	Blenniidae	Ophioblennius steindachneri	0.00666667	Large banded blenny	NA
UVC	UVC_Site_8		2016-03-16	10.2942	-109.2	0_250m	10	Cnidaria	Anthozoa	Scleractinia	Pocilloporidae	Pocillopora elegans	1	elegant cauliflour coral	0.4
UVC	UVC_Site_8		2016-03-16	10.2942	-109.2	0_250m	20	Chordata	Actinopterygii	Perciformes	Scaridae	Scarus rubroviolaceus	0.0133333	Redlip parrotfish	NA
UVC	UVC_Site_8		2016-03-16	10.2942	-109.2	0_250m	20	Cnidaria	Anthozoa	Scleractinia	Agariciidae	Pavona maldivensis	1	maldives coral	0.4
UVC	UVC_Site_8		2016-03-16	10.2942	-109.2	0_250m	10	Chordata	Actinopterygii	Perciformes	Cirrhitidae	Cirrhitichthys oxycephalus	0.24	Coral hawkfish	NA
UVC	UVC_Site_8		2016-03-16	10.2942	-109.2	0_250m	20	Chordata	Actinopterygii	Anguilliformes	Muraenidae	Gymnothorax dovii	0.00333333	Speckled moray	NA
UVC	UVC_Site_8		2016-03-16	10.2942	-109.2	0_250m	20	Chordata	Actinopterygii	Perciformes	Cirrhitidae	Cirrhitichthys oxycephalus	0.126667	Coral hawkfish	NA
UVC	UVC_Site_8		2016-03-16	10.2942	-109.2	0_250m	10	Chordata	Actinopterygii	Tetraodontiformes	Monacanthidae	Cantherhines dumerilii	0.00666667	Barred filefish	NA
UVC	UVC_Site_8		2016-03-16	10.2942	-109.2	0_250m	10	Chordata	Actinopterygii	Perciformes	Pomacanthidae	Holacanthus clarionensis	0.00666667	Clarion angelfish	NA
UVC	UVC_Site_8		2016-03-16	10.2942	-109.2	0_250m	20	Chordata	Actinopterygii	Perciformes	Carangidae	Elagatis bipinnulata	0.00333333	Rainbow runner	NA
UVC	UVC_Site_8		2016-03-16	10.2942	-109.2	0_250m	10	Chordata	Actinopterygii	Perciformes	Carangidae	Caranx lugubris	0.00333333	Black jack	NA
UVC	UVC_Site_8		2016-03-16	10.2942	-109.2	0_250m	10	Chordata	Actinopterygii	Perciformes	Acanthuridae	Ctenochaetus marginatus	0.07	Stripedfin surgeonfish	NA
UVC	UVC_Site_8		2016-03-16	10.2942	-109.2	0_250m	20	Chordata	Actinopterygii	Perciformes	Acanthuridae	Ctenochaetus marginatus	0.0633333	Stripedfin surgeonfish	NA
UVC	UVC_Site_8		2016-03-16	10.2942	-109.2	0_250m	20	Chordata	Actinopterygii	Perciformes	Kyphosidae	Kyphosus elegans	0.00333333	Cortez sea chub	NA
UVC	UVC_Site_8		2016-03-16	10.2942	-109.2	0_250m	20	Cnidaria	Anthozoa	Scleractinia	Agariciidae	Pavona varians	2	false brain coral	0.8
UVC	UVC_Site_8		2016-03-16	10.2942	-109.2	0_250m	10	Cnidaria	Anthozoa	Scleractinia	Agariciidae	Pavona varians	3	false brain coral	1.2
UVC	UVC_Site_8		2016-03-16	10.2942	-109.2	0_250m	10	Cnidaria	Anthozoa	Scleractinia	Pocilloporidae	Pocillopora effusus	40	stony cauliflour coral	16
UVC	UVC_Site_8		2016-03-16	10.2942	-109.2	0_250m	20	Chordata	Actinopterygii	Syngnathiformes	Aulostomidae	Aulostomus chinensis	0.00333333	Chinese trumpetfish	NA
UVC	UVC_Site_8		2016-03-16	10.2942	-109.2	0_250m	20	Cnidaria	Anthozoa	Scleractinia	Pocilloporidae	Pocillopora effusus	4	stony cauliflour coral	1.6
UVC	UVC_Site_8		2016-03-16	10.2942	-109.2	0_250m	20	Chordata	Actinopterygii	Perciformes	Pomacanthidae	Holacanthus clarionensis	0.00333333	Clarion angelfish	NA
UVC	UVC_Site_8		2016-03-16	10.2942	-109.2	0_250m	20	Cnidaria	Anthozoa	Scleractinia	Agariciidae	Pavona minuta	1	leaf coral	0.4
UVC	UVC_Site_8		2016-03-16	10.2942	-109.2	0_250m	20	Cnidaria	Anthozoa	Scleractinia	Poritidae	Porites lobata	25	lobe coral	10
UVC	UVC_Site_8		2016-03-16	10.2942	-109.2	0_250m	10	Chordata	Actinopterygii	Tetraodontiformes	Balistidae	Sufflamen verres	0.01	Orangside triggerfish	NA
UVC	UVC_Site_8		2016-03-16	10.2942	-109.2	0_250m	10	Chordata	Actinopterygii	Perciformes	Pomacentridae	Stegastes beebei	1.14667	Galapagos ringtail damselfish	NA
UVC	UVC_Site_8		2016-03-16	10.2942	-109.2	0_250m	10	Chordata	Actinopterygii	Tetraodontiformes	Ostraciidae	Ostracion meleagris	0.00666667	White spotted box fish	NA
UVC	UVC_Site_8		2016-03-16	10.2942	-109.2	0_250m	20	Chordata	Actinopterygii	Perciformes	Pomacentridae	Stegastes beebei	0.9	Galapagos ringtail damselfish	NA
UVC	UVC_Site_8		2016-03-16	10.2942	-109.2	0_250m	20	Chordata	Actinopterygii	Perciformes	Labridae	Stethojulis bandanensis	0.00666667	Red shoulder wrasse	NA
UVC	UVC_Site_8		2016-03-16	10.2942	-109.2	0_250m	10	Cnidaria	Anthozoa	Scleractinia	Poritidae	Porites lobata	28	lobe coral	11.2
UVC	UVC_Site_8		2016-03-16	10.2942	-109.2	0_250m	20	Cnidaria	Anthozoa	Scleractinia	Poritidae	Porites arnaudi	30	Porites arnaudi	12
UVC	UVC_Site_8		2016-03-16	10.2942	-109.2	0_250m	10	Chordata	Actinopterygii	Perciformes	Labridae	Thalassoma robertsoni	0.82	Clipperton rainbow wrasse	NA
UVC	UVC_Site_8		2016-03-16	10.2942	-109.2	0_250m	20	Chordata	Actinopterygii	Perciformes	Labridae	Thalassoma robertsoni	2.9	Clipperton rainbow wrasse	NA
UVC	UVC_Site_8		2016-03-16	10.2942	-109.2	0_250m	10	Chordata	Actinopterygii	Perciformes	Carangidae	Caranx melampygus	0.02	Bluefin trevally	NA
UVC	UVC_Site_8		2016-03-16	10.2942	-109.2	0_250m	10	Chordata	Actinopterygii	Perciformes	Acanthuridae	Acanthurus triostegus	0.0333333	Convict tang	NA
UVC	UVC_Site_8		2016-03-16	10.2942	-109.2	0_250m	10	Chordata	Actinopterygii	Tetraodontiformes	Tetraodontidae	Canthigaster punctatissima	0.00666667	Spotted sharpmose puffer	NA
UVC	UVC_Site_8		2016-03-16	10.2942	-109.2	0_250m	20	Chordata	Actinopterygii	Tetraodontiformes	Tetraodontidae	Canthigaster punctatissima	0.0266667	Spotted sharpmose puffer	NA
UVC	UVC_Site_8		2016-03-16	10.2942	-109.2	0_250m	20	Cnidaria	Anthozoa	Scleractinia	Pocilloporidae	Pocillopora verrucosa	1	warty cauliflour coral	0.4
UVC	UVC_Site_8		2016-03-16	10.2942	-109.2	0_250m	10	Chordata	Actinopterygii	Tetraodontiformes	Tetraodontidae	Arothron meleagris	0.00666667	Golden puffer	NA
UVC	UVC_Site_8		2016-03-16	10.2942	-109.2	0_250m	20	Chordata	Actinopterygii	Beryciformes	Holocentridae	Myripristis berndti	0.0166667	Blotcheye soldierfish	NA
UVC	UVC_Site_8		2016-03-16	10.2942	-109.2	0_250m	20	Cnidaria	Anthozoa	Scleractinia	Pocilloporidae	Pocillopora meandrina	1	cauliflour coral	0.4
UVC	UVC_Site_8		2016-03-16	10.2942	-109.2	0_250m	10	Cnidaria	Anthozoa	Scleractinia	Pocilloporidae	Pocillopora meandrina	4	cauliflour coral	1.6
UVC	UVC_Site_8		2016-03-16	10.2942	-109.2	0_250m	20	Chordata	Actinopterygii	Tetraodontiformes	Tetraodontidae	Arothron meleagris	0.01	Golden puffer	NA
UVC	UVC_Site_8		2016-03-16	10.2942	-109.2	0_250m	20	Chordata	Actinopterygii	Perciformes	Carangidae	Caranx melampygus	0.0166667	Bluefin trevally	NA
UVC	UVC_Site_8		2016-03-16	10.2942	-109.2	0_250m	20	Chordata	Actinopterygii	Perciformes	Serranidae	Paranthias colonus	4.48	Pacific creolefish	NA
UVC	UVC_Site_8		2016-03-16	10.2942	-109.2	0_250m	20	Chordata	Actinopterygii	Perciformes	Labridae	Bodianus diplotaenia	0.01	Mexican hogfish	NA
UVC	UVC_Site_8		2016-03-16	10.2942	-109.2	0_250m	20	Chordata	Actinopterygii	Perciformes	Zanclidae	Zanclus cornutus	0.0266667	Moorish idol	NA
UVC	UVC_Site_8		2016-03-16	10.2942	-109.2	0_250m	10	Chordata	Actinopterygii	Perciformes	Serranidae	Dermatolepis dermatolepis	0.00666667	Leather bass	NA
UVC	UVC_Site_8		2016-03-16	10.2942	-109.2	0_250m	20	Chordata	Actinopterygii	Perciformes	Serranidae	Dermatolepis dermatolepis	0.0466667	Leather bass	NA
UVC	UVC_Site_8		2016-03-16	10.2942	-109.2	0_250m	10	Chordata	Actinopterygii	Perciformes	Labridae	Stethojulis bandanensis	0.0133333	Red shoulder wrasse	NA
UVC	UVC_Site_8		2016-03-16	10.2942	-109.2	0_250m	20	Cnidaria	Anthozoa	Scleractinia	Agariciidae	Leptoseris incrustans	5	crust coral	2
UVC	UVC_Site_8		2016-03-16	10.2942	-109.2	0_250m	10	Cnidaria	Anthozoa	Scleractinia	Poritidae	Porites arnaudi	1	Porites arnaudi	0.4
UVC	UVC_Site_8		2016-03-16	10.2942	-109.2	0_250m	10	Chordata	Actinopterygii	Perciformes	Serranidae	Paranthias colonus	1.84667	Pacific creolefish	NA
UVC	UVC_Site_8		2016-03-16	10.2942	-109.2	0_250m	10	Cnidaria	Anthozoa	Scleractinia	Pocilloporidae	Pocillopora eydouxi	2	antler coral	0.8
UVC	UVC_Site_8		2016-03-16	10.2942	-109.2	0_250m	20	Chordata	Actinopterygii	Perciformes	Acanthuridae	Acanthurus nigricans	0.163333	White cheek surgeonfish	NA
UVC	UVC_Site_8		2016-03-16	10.2942	-109.2	0_250m	20	Chordata	Actinopterygii	Perciformes	Balistidae	Melichthys niger	0.0233333	Black triggerfish	NA
UVC	UVC_Site_8		2016-03-16	10.2942	-109.2	0_250m	20	Chordata	Actinopterygii	Perciformes	Carangidae	Caranx lugubris	0.0233333	Black jack	NA
UVC	UVC_Site_8		2016-03-16	10.2942	-109.2	0_250m	20	Cnidaria	Anthozoa	Scleractinia	Agariciidae	Pavona clavus	5	swollen coral	2
UVC	UVC_Site_8		2016-03-16	10.2942	-109.2	0_250m	20	Chordata	Actinopterygii	Perciformes	Serranidae	Epinephelus labriformis	0.0566667	Starry grouper	NA
UVC	UVC_Site_8		2016-03-16	10.2942	-109.2	0_250m	10	Chordata	Actinopterygii	Perciformes	Acanthuridae	Acanthurus nigricans	0.07	White cheek surgeonfish	NA
UVC	UVC_Site_9		2016-03-16	10.2864	-109.22	0_250m	10	Chordata	Actinopterygii	Perciformes	Blenniidae	Ophioblennius steindachneri	0.0466667	Large banded blenny	NA
UVC	UVC_Site_9		2016-03-16	10.2864	-109.22	0_250m	10	Chordata	Actinopterygii	Perciformes	Kyphosidae	Kyphosus elegans	0.00333333	Cortez sea chub	NA
UVC	UVC_Site_9		2016-03-16	10.2864	-109.22	0_250m	20	Chordata	Actinopterygii	Perciformes	Kyphosidae	Kyphosus elegans	0.05	Cortez sea chub	NA
UVC	UVC_Site_9		2016-03-16	10.2864	-109.22	0_250m	20	Chordata	Actinopterygii	Perciformes	Kyphosidae	Sectator ocyurus	0.0166667	Bluestriped chub	NA
UVC	UVC_Site_9		2016-03-16	10.2864	-109.22	0_250m	20	Chordata	Actinopterygii	Perciformes	Blenniidae	Ophioblennius steindachneri	0.0333333	Large banded blenny	NA
UVC	UVC_Site_9		2016-03-16	10.2864	-109.22	0_250m	20	Chordata	Actinopterygii	Perciformes	Labridae	Thalassoma grammaticum	0.0466667	Sunset wrasse	NA
UVC	UVC_Site_9		2016-03-16	10.2864	-109.22	0_250m	20	Chordata	Actinopterygii	Perciformes	Labridae	Thalassoma robertsoni	0.966667	Clipperton rainbow wrasse	NA
UVC	UVC_Site_9		2016-03-16	10.2864	-109.22	0_250m	10	Cnidaria	Anthozoa	Scleractinia	Pocilloporidae	Pocillopora meandrina	2	cauliflour coral	0.8
UVC	UVC_Site_9		2016-03-16	10.2864	-109.22	0_250m	10	Cnidaria	Anthozoa	Scleractinia	Pocilloporidae	Pocillopora effusus	73	stony cauliflour coral	29.2
UVC	UVC_Site_9		2016-03-16	10.2864	-109.22	0_250m	10	Chordata	Actinopterygii	Perciformes	Labridae	Thalassoma virens	0.00666667	Emerald wrasse	NA
UVC	UVC_Site_9		2016-03-16	10.2864	-109.22	0_250m	20	Cnidaria	Anthozoa	Scleractinia	Pocilloporidae	Pocillopora effusus	5	stony cauliflour coral	2
UVC	UVC_Site_9		2016-03-16	10.2864	-109.22	0_250m	20	Cnidaria	Anthozoa	Scleractinia	Poritidae	Porites arnaudi	91	Porites arnaudi	36.4
UVC	UVC_Site_9		2016-03-16	10.2864	-109.22	0_250m	10	Chordata	Actinopterygii	Perciformes	Labridae	Stethojulis bandanensis	0.00666667	Red shoulder wrasse	NA
UVC	UVC_Site_9		2016-03-16	10.2864	-109.22	0_250m	10	Chordata	Actinopterygii	Perciformes	Labridae	Bodianus diplotaenia	0.00333333	Mexican hogfish	NA
UVC	UVC_Site_9		2016-03-16	10.2864	-109.22	0_250m	10	Chordata	Actinopterygii	Perciformes	Labridae	Thalassoma grammaticum	0.08	Sunset wrasse	NA
UVC	UVC_Site_9		2016-03-16	10.2864	-109.22	0_250m	20	Chordata	Actinopterygii	Perciformes	Lutjanidae	Lutjanus viridis	0.14	Blue and gold snapper	NA
UVC	UVC_Site_9		2016-03-16	10.2864	-109.22	0_250m	10	Chordata	Actinopterygii	Perciformes	Labridae	Thalassoma robertsoni	2.72667	Clipperton rainbow wrasse	NA
UVC	UVC_Site_9		2016-03-16	10.2864	-109.22	0_250m	10	Chordata	Actinopterygii	Tetraodontiformes	Tetraodontidae	Arothron meleagris	0.00333333	Golden puffer	NA
UVC	UVC_Site_9		2016-03-16	10.2864	-109.22	0_250m	20	Cnidaria	Anthozoa	Scleractinia	Agariciidae	Pavona clavus	18	swollen coral	7.2
UVC	UVC_Site_9		2016-03-16	10.2864	-109.22	0_250m	20	Chordata	Actinopterygii	Perciformes	Serranidae	Epinephelus labriformis	0.0733333	Starry grouper	NA
UVC	UVC_Site_9		2016-03-16	10.2864	-109.22	0_250m	20	Cnidaria	Anthozoa	Scleractinia	Poritidae	Porites lutea	4	hump coral	1.6
UVC	UVC_Site_9		2016-03-16	10.2864	-109.22	0_250m	20	Chordata	Actinopterygii	Tetraodontiformes	Tetraodontidae	Canthigaster punctatissima	0.00666667	Spotted sharpmose puffer	NA
UVC	UVC_Site_9		2016-03-16	10.2864	-109.22	0_250m	10	Chordata	Actinopterygii	Tetraodontiformes	Tetraodontidae	Canthigaster punctatissima	0.00666667	Spotted sharpmose puffer	NA
UVC	UVC_Site_9		2016-03-16	10.2864	-109.22	0_250m	20	Chordata	Actinopterygii	Perciformes	Carangidae	Caranx melampygus	0.0233333	Bluefin trevally	NA
UVC	UVC_Site_9		2016-03-16	10.2864	-109.22	0_250m	10	Chordata	Actinopterygii	Perciformes	Carangidae	Caranx melampygus	0.02	Bluefin trevally	NA
UVC	UVC_Site_9		2016-03-16	10.2864	-109.22	0_250m	10	Chordata	Actinopterygii	Perciformes	Serranidae	Paranthias colonus	1.39333	Pacific creolefish	NA
UVC	UVC_Site_9		2016-03-16	10.2864	-109.22	0_250m	10	Chordata	Actinopterygii	Perciformes	Acanthuridae	Acanthurus nigricans	0.146667	White cheek surgeonfish	NA
UVC	UVC_Site_9		2016-03-16	10.2864	-109.22	0_250m	20	Chordata	Actinopterygii	Perciformes	Acanthuridae	Acanthurus nigricans	0.243333	White cheek surgeonfish	NA
UVC	UVC_Site_9		2016-03-16	10.2864	-109.22	0_250m	20	Chordata	Chondrichthyes	Carcharhiniformes	Carcharhinidae	Carcharhinus galapagensis	0.00333333	Galapagos shark	NA
UVC	UVC_Site_9		2016-03-16	10.2864	-109.22	0_250m	20	Chordata	Actinopterygii	Tetraodontiformes	Tetraodontidae	Arothron meleagris	0.0266667	Golden puffer	NA
UVC	UVC_Site_9		2016-03-16	10.2864	-109.22	0_250m	10	Cnidaria	Anthozoa	Scleractinia	Poritidae	Porites lutea	17	hump coral	6.8
UVC	UVC_Site_9		2016-03-16	10.2864	-109.22	0_250m	10	Chordata	Actinopterygii	Perciformes	Acanthuridae	Acanthurus triostegus	0.0266667	Convict tang	NA
UVC	UVC_Site_9		2016-03-16	10.2864	-109.22	0_250m	20	Chordata	Actinopterygii	Perciformes	Balistidae	Melichthys niger	0.0166667	Black triggerfish	NA
UVC	UVC_Site_9		2016-03-16	10.2864	-109.22	0_250m	10	Chordata	Actinopterygii	Perciformes	Balistidae	Melichthys niger	0.0733333	Black triggerfish	NA
UVC	UVC_Site_9		2016-03-16	10.2864	-109.22	0_250m	10	Chordata	Actinopterygii	Tetraodontiformes	Monacanthidae	Cantherhines dumerilii	0.00333333	Barred filefish	NA
UVC	UVC_Site_9		2016-03-16	10.2864	-109.22	0_250m	10	Chordata	Actinopterygii	Perciformes	Zanclidae	Zanclus cornutus	0.00666667	Moorish idol	NA
UVC	UVC_Site_9		2016-03-16	10.2864	-109.22	0_250m	20	Chordata	Actinopterygii	Perciformes	Zanclidae	Zanclus cornutus	0.04	Moorish idol	NA
UVC	UVC_Site_9		2016-03-16	10.2864	-109.22	0_250m	10	Chordata	Actinopterygii	Tetraodontiformes	Balistidae	Sufflamen verres	0.0133333	Orangside triggerfish	NA
UVC	UVC_Site_9		2016-03-16	10.2864	-109.22	0_250m	20	Chordata	Actinopterygii	Syngnathiformes	Aulostomidae	Aulostomus chinensis	0.00666667	Chinese trumpetfish	NA
UVC	UVC_Site_9		2016-03-16	10.2864	-109.22	0_250m	20	Chordata	Actinopterygii	Perciformes	Acanthuridae	Ctenochaetus marginatus	0.0366667	Stripedfin surgeonfish	NA
UVC	UVC_Site_9		2016-03-16	10.2864	-109.22	0_250m	10	Chordata	Actinopterygii	Perciformes	Acanthuridae	Ctenochaetus marginatus	0.05	Stripedfin surgeonfish	NA
UVC	UVC_Site_9		2016-03-16	10.2864	-109.22	0_250m	20	Chordata	Actinopterygii	Perciformes	Serranidae	Paranthias colonus	1.33667	Pacific creolefish	NA
UVC	UVC_Site_9		2016-03-16	10.2864	-109.22	0_250m	20	Chordata	Actinopterygii	Perciformes	Cirrhitidae	Cirrhitus rivulatus	0.00666667	Giant hawkfish	NA
UVC	UVC_Site_9		2016-03-16	10.2864	-109.22	0_250m	10	Cnidaria	Anthozoa	Scleractinia	Poritidae	Porites lobata	39	lobe coral	15.6
UVC	UVC_Site_9		2016-03-16	10.2864	-109.22	0_250m	20	Chordata	Actinopterygii	Perciformes	Carangidae	Elagatis bipinnulata	0.00333333	Rainbow runner	NA
UVC	UVC_Site_9		2016-03-16	10.2864	-109.22	0_250m	20	Cnidaria	Anthozoa	Scleractinia	Poritidae	Porites lobata	75	lobe coral	30
UVC	UVC_Site_9		2016-03-16	10.2864	-109.22	0_250m	20	Cnidaria	Anthozoa	Scleractinia	Agariciidae	Pavona varians	10	false brain coral	4
UVC	UVC_Site_9		2016-03-16	10.2864	-109.22	0_250m	20	Chordata	Actinopterygii	Perciformes	Chaetodontidae	Forcipiger flavissimus	0.00666667	Yellow longnose butterfly	NA
UVC	UVC_Site_9		2016-03-16	10.2864	-109.22	0_250m	20	Chordata	Actinopterygii	Perciformes	Kyphosidae	Kyphosus analogus	0.0666667	Blue-bronze sea chub	NA
UVC	UVC_Site_9		2016-03-16	10.2864	-109.22	0_250m	10	Chordata	Actinopterygii	Perciformes	Pomacanthidae	Holacanthus clarionensis	0.00666667	Clarion angelfish	NA
UVC	UVC_Site_9		2016-03-16	10.2864	-109.22	0_250m	20	Chordata	Actinopterygii	Perciformes	Pomacanthidae	Holacanthus clarionensis	0.02	Clarion angelfish	NA
UVC	UVC_Site_9		2016-03-16	10.2864	-109.22	0_250m	10	Chordata	Actinopterygii	Anguilliformes	Muraenidae	Gymnothorax dovii	0.00666667	Speckled moray	NA
UVC	UVC_Site_9		2016-03-16	10.2864	-109.22	0_250m	10	Chordata	Actinopterygii	Perciformes	Pomacentridae	Stegastes beebei	0.493333	Galapagos ringtail damselfish	NA
UVC	UVC_Site_9		2016-03-16	10.2864	-109.22	0_250m	10	Chordata	Actinopterygii	Perciformes	Serranidae	Epinephelus labriformis	0.0133333	Starry grouper	NA
UVC	UVC_Site_9		2016-03-16	10.2864	-109.22	0_250m	20	Cnidaria	Anthozoa	Scleractinia	Agariciidae	Pavona maldivensis	5	maldives coral	2
UVC	UVC_Site_9		2016-03-16	10.2864	-109.22	0_250m	20	Chordata	Actinopterygii	Perciformes	Carangidae	Caranx lugubris	0.00333333	Black jack	NA
UVC	UVC_Site_9		2016-03-16	10.2864	-109.22	0_250m	10	Cnidaria	Anthozoa	Scleractinia	Agariciidae	Pavona clavus	4	swollen coral	1.6
UVC	UVC_Site_9		2016-03-16	10.2864	-109.22	0_250m	10	Chordata	Actinopterygii	Perciformes	Scaridae	Scarus rubroviolaceus	0.01	Redlip parrotfish	NA
UVC	UVC_Site_9		2016-03-16	10.2864	-109.22	0_250m	20	Chordata	Actinopterygii	Perciformes	Cirrhitidae	Cirrhitichthys oxycephalus	0.04	Coral hawkfish	NA
UVC	UVC_Site_9		2016-03-16	10.2864	-109.22	0_250m	10	Chordata	Actinopterygii	Perciformes	Cirrhitidae	Cirrhitichthys oxycephalus	0.1	Coral hawkfish	NA
UVC	UVC_Site_9		2016-03-16	10.2864	-109.22	0_250m	20	Chordata	Actinopterygii	Beryciformes	Holocentridae	Myripristis berndti	0.236667	Blotcheye soldierfish	NA
UVC	UVC_Site_9		2016-03-16	10.2864	-109.22	0_250m	20	Cnidaria	Anthozoa	Scleractinia	Agariciidae	Leptoseris incrustans	4	crust coral	1.6
UVC	UVC_Site_9		2016-03-16	10.2864	-109.22	0_250m	10	Chordata	Actinopterygii	Perciformes	Serranidae	Dermatolepis dermatolepis	0.00666667	Leather bass	NA
UVC	UVC_Site_9		2016-03-16	10.2864	-109.22	0_250m	20	Chordata	Actinopterygii	Perciformes	Serranidae	Dermatolepis dermatolepis	0.0133333	Leather bass	NA
UVC	UVC_Site_9		2016-03-16	10.2864	-109.22	0_250m	20	Chordata	Actinopterygii	Perciformes	Serranidae	Epinephelus clippertonensis	0.00333333	Clipperton grouper	NA
UVC	UVC_Site_9		2016-03-16	10.2864	-109.22	0_250m	20	Chordata	Actinopterygii	Perciformes	Chaetodontidae	Johnrandallia nigrirostris	0.0333333	Blacknosed butterflyfish	NA
UVC	UVC_Site_9		2016-03-16	10.2864	-109.22	0_250m	20	Chordata	Actinopterygii	Perciformes	Pomacentridae	Stegastes beebei	0.113333	Galapagos ringtail damselfish	NA

## Sheet: Headings explained
Heading	Description
Method	Drop cam = drop cameras, Sub = submersible, UVC = underwater visual census
Method_Dive	Combination of methods and unique dive number
Dive	Unique dive number
Date	dd-mmm-yy
Lat	Decimal degrees
Long	Decimal degrees
Depth_range	Min and max depth range in meters
Depth_m	Actial depth in meters
Phylum	Phylum
Class	Class
Order	Order
Family	Family
Genus species	Genus and species
abundance_num_m^2	Number per meter squared
Common name	Common name
Percent cover	Percent cover for sessile benthos
